# Supplementary material for: Progesterone Inhibits Epithelial-to-Mesenchymal Transition in Endometrial Cancer
Source: PLoS One. 2012 Jan 25;7(1):e30840. doi: 10.1371/journal.pone.0030840 (PMC3266274; doi:10.1371/journal.pone.0030840)
Supplement: Table S2 — List of differentially expressed genes in endometrial carcinoma patient samples. Differentially regulated genes between non-progressive (n = 4) and progressive (n = 4) endometrial cancer samples. Negative values indicate down regulation in progressive disease, positive values indicate up regulation in progressive disease. A fold chance of +/−1.25 was used as a cutoff point. (XLS) [file pone.0030840.s002.xls]

## Sheet: Sheet1
Table S2: List of differentially expressed genes in endometrial carcinoma patient samples
Differentially regulated genes between non-progressive (n = 4) and progressive (n = 4) endometrial cancer samples. Negative values indicate down regulation in progressive disease, positive values indicate up regulation in progressive disease. A fold chance of +/- 1.25 was used as a cutoff point.
Down regulated genes (n=4098):
Gene Title	Gene Symbol	Foldchance
dickkopf homolog 4 (Xenopus laevis)	DKK4	-80.7168
chemokine (C-X-C motif) ligand 14	CXCL14	-32.952
small proline-rich protein 1A	SPRR1A	-30.6509
mucin-like 1	MUCL1	-30.1613
amiloride binding protein 1 (amine oxidase (copper-containing))	ABP1	-20.9179
fibroblast growth factor 20	FGF20	-20.8102
tryptophan hydroxylase 1 (tryptophan 5-monooxygenase)	TPH1	-20.6356
chemokine (C-X-C motif) ligand 14	CXCL14	-20.5107
small proline-rich protein 3	SPRR3	-19.046
orosomucoid 1 /// orosomucoid 2	ORM1 /// ORM2	-15.515
secretoglobin, family 1D, member 1	SCGB1D1	-14.7487
small proline-rich protein 2B	SPRR2B	-12.3529
serpin peptidase inhibitor, clade B (ovalbumin), member 3	SERPINB3	-12.1265
dickkopf homolog 1 (Xenopus laevis)	DKK1	-11.744
cytochrome P450, family 4, subfamily B, polypeptide 1	CYP4B1	-10.7561
serine peptidase inhibitor, Kazal type 6	SPINK6	-10.381
small proline-rich protein 3	SPRR3	-9.98484
serpin peptidase inhibitor, clade B (ovalbumin), member 3	SERPINB3	-9.64644
orosomucoid 1 /// orosomucoid 2	ORM1 /// ORM2	-9.63141
ovostatin 2 /// ovostatin /// similar to hCG38149 /// hypothetical protein LOC100132881	LOC100132881 /// LOC728715 /// OVOS /// OVOS2	-8.83623
EPH receptor A3	EPHA3	-8.78355
crystallin, beta A4	CRYBA4	-8.60639
GDNF family receptor alpha 3	GFRA3	-8.43065
family with sequence similarity 3, member B	FAM3B	-8.4299
notum pectinacetylesterase homolog (Drosophila)	NOTUM	-7.78717
polymeric immunoglobulin receptor	PIGR	-7.21234
ADAM metallopeptidase with thrombospondin type 1 motif, 6	ADAMTS6	-7.20082
ectonucleotide pyrophosphatase/phosphodiesterase 3	ENPP3	-7.09779
uroplakin 1B	UPK1B	-6.94594
KN motif and ankyrin repeat domains 4	KANK4	-6.43381
chemokine (C-X-C motif) ligand 14	CXCL14	-6.3495
phosphatase and actin regulator 2	PHACTR2	-6.29029
leucine rich repeat containing 3B	LRRC3B	-6.19835
thrombospondin 4	THBS4	-6.07712
G protein-coupled receptor 64	GPR64	-6.00284
calneuron 1	CALN1	-5.92982
cystatin SN	CST1	-5.91502
glutamate decarboxylase 1 (brain, 67kDa)	GAD1	-5.74346
flavin containing monooxygenase 6 pseudogene	FMO6P	-5.73006
myosin, heavy chain 7B, cardiac muscle, beta	MYH7B	-5.7198
calneuron 1	CALN1	-5.65503
ectonucleotide pyrophosphatase/phosphodiesterase 3	ENPP3	-5.55754
NDRG family member 2	NDRG2	-5.54004
endothelin 3	EDN3	-5.53433
matrilin 2	MATN2	-5.48319
vitelline membrane outer layer 1 homolog (chicken)	VMO1	-5.29414
orosomucoid 1	ORM1	-5.27142
roundabout, axon guidance receptor, homolog 2 (Drosophila)	ROBO2	-5.22421
mucin 15, cell surface associated	MUC15	-5.16775
lysozyme (renal amyloidosis)	LYZ	-5.16773
myosin, heavy chain 11, smooth muscle	MYH11	-5.12169
RPE-spondin	RPESP	-5.12143
solute carrier family 47, member 1	SLC47A1	-5.02595
prospero homeobox 1	PROX1	-4.83452
chromosome 10 open reading frame 99	C10orf99	-4.82075
cysteine-rich secretory protein 3	CRISP3	-4.77452
BCL2/adenovirus E1B 19kD interacting protein like	BNIPL	-4.76456
peroxisomal D3,D2-enoyl-CoA isomerase	PECI	-4.76234
glutamate decarboxylase 1 (brain, 67kDa)	GAD1	-4.73116
twist homolog 1 (acrocephalosyndactyly 3; Saethre-Chotzen syndrome) (Drosophila)	TWIST1	-4.63561
left-right determination factor 2	LEFTY2	-4.63073
coiled-coil domain containing 144A /// coiled-coil domain containing 144B /// coiled-coil domain containing 144C /// similar to Coiled-coil domain containing 144B	CCDC144A /// CCDC144B /// CCDC144C /// LOC100134159	-4.5648
mohawk homeobox	MKX	-4.54854
transcription factor CP2-like 1	TFCP2L1	-4.54037
DNA-damage-inducible transcript 4-like	DDIT4L	-4.53947
carcinoembryonic antigen-related cell adhesion molecule 5	CEACAM5	-4.52218
collagen, type XXI, alpha 1	COL21A1	-4.49271
prostaglandin-endoperoxide synthase 2 (prostaglandin G/H synthase and cyclooxygenase)	PTGS2	-4.48119
brain-derived neurotrophic factor	BDNF	-4.4645
forkhead box Q1	FOXQ1	-4.46043
BMP and activin membrane-bound inhibitor homolog (Xenopus laevis)	BAMBI	-4.45732
prostaglandin-endoperoxide synthase 2 (prostaglandin G/H synthase and cyclooxygenase)	PTGS2	-4.45403
myosin, heavy chain 7B, cardiac muscle, beta	MYH7B	-4.43812
ATPase, H+ transporting, lysosomal V0 subunit a4	ATP6V0A4	-4.41896
tachykinin, precursor 1	TAC1	-4.3844
axin 2 (conductin, axil)	AXIN2	-4.32105
ADAM metallopeptidase with thrombospondin type 1 motif, 8	ADAMTS8	-4.29914
secretoglobin, family 2A, member 2	SCGB2A2	-4.24826
RAS-like, estrogen-regulated, growth inhibitor	RERG	-4.23017
asporin	ASPN	-4.22458
adrenergic, alpha-2A-, receptor	ADRA2A	-4.21971
phospholamban	PLN	-4.1656
Immunoglobulin lambda joining 3	IGL@	-4.14941
ADAM metallopeptidase with thrombospondin type 1 motif, 6	ADAMTS6	-4.14636
transmembrane protein 178	TMEM178	-4.14073
ADAM metallopeptidase with thrombospondin type 1 motif, 8	ADAMTS8	-4.06792
uroplakin 1B	UPK1B	-4.06657
hydroxyprostaglandin dehydrogenase 15-(NAD)	HPGD	-4.011
WNT inhibitory factor 1	WIF1	-3.97605
Solute carrier family 40 (iron-regulated transporter), member 1	SLC40A1	-3.94282
insulin-like growth factor 1 (somatomedin C)	IGF1	-3.93248
Synaptotagmin XVII	SYT17	-3.89962
defensin, alpha 5, Paneth cell-specific	DEFA5	-3.87781
Zic family member 2 (odd-paired homolog, Drosophila)	ZIC2	-3.86569
hydroxyprostaglandin dehydrogenase 15-(NAD)	HPGD	-3.85957
dachshund homolog 1 (Drosophila)	DACH1	-3.85492
calponin 1, basic, smooth muscle	CNN1	-3.84622
sorbitol dehydrogenase	SORD	-3.81349
Transcription factor CP2-like 1	TFCP2L1	-3.80903
chemokine (C-X3-C motif) receptor 1	CX3CR1	-3.79765
immunoglobulin lambda locus	IGL@	-3.79053
hypothetical protein LOC641518	LOC641518	-3.74058
metallothionein 1M	MT1M	-3.71365
solute carrier family 46, member 2	SLC46A2	-3.70242
ADAM metallopeptidase with thrombospondin type 1 motif, 18	ADAMTS18	-3.69945
DEP domain containing 2	DEPDC2	-3.68546
matrix Gla protein	MGP	-3.65233
adenomatosis polyposis coli down-regulated 1	APCDD1	-3.63846
RAS-like, family 11, member B	RASL11B	-3.62419
phospholamban	PLN	-3.61619
carcinoembryonic antigen-related cell adhesion molecule 7	CEACAM7	-3.61498
keratin 5 (epidermolysis bullosa simplex, Dowling-Meara/Kobner/Weber-Cockayne types)	KRT5	-3.59638
proline/arginine-rich end leucine-rich repeat protein	PRELP	-3.5843
zinc finger protein 300	ZNF300	-3.57751
solute carrier family 35, member F3	SLC35F3	-3.56918
phospholamban	PLN	-3.56099
immunoglobulin lambda locus	IGL@	-3.54426
myosin, heavy chain 11, smooth muscle	MYH11	-3.54121
kallikrein-related peptidase 11	KLK11	-3.53598
oxysterol binding protein-like 6	OSBPL6	-3.53523
RAS-like, estrogen-regulated, growth inhibitor	RERG	-3.53018
glutamate decarboxylase 1 (brain, 67kDa)	GAD1	-3.48523
prospero homeobox 1	PROX1	-3.48002
doublesex and mab-3 related transcription factor 1	DMRT1	-3.47601
inter-alpha (globulin) inhibitor H5	ITIH5	-3.47351
regulator of calcineurin 1	RCAN1	-3.45643
Cyclin-dependent kinase inhibitor 1C (p57, Kip2)	CDKN1C	-3.43339
alcohol dehydrogenase 1B (class I), beta polypeptide	ADH1B	-3.4267
serine peptidase inhibitor, Kazal type 7 (putative)	SPINK7	-3.42604
trichohyalin	TCHH	-3.40583
reticulon 1	RTN1	-3.40479
UDP-N-acetyl-alpha-D-galactosamine:polypeptide N-acetylgalactosaminyltransferase-like 1	GALNTL1	-3.40429
pro-melanin-concentrating hormone	PMCH	-3.38957
hypothetical protein LOC100130468	LOC100130468	-3.37906
proline/arginine-rich end leucine-rich repeat protein	PRELP	-3.37905
gap junction protein, beta 6, 30kDa	GJB6	-3.37628
glutathione S-transferase theta 1	GSTT1	-3.35148
oviductal glycoprotein 1, 120kDa (mucin 9, oviductin)	OVGP1	-3.34969
tumor necrosis factor (ligand) superfamily, member 11	TNFSF11	-3.33024
insulin-like growth factor binding protein 5	IGFBP5	-3.32282
immunoglobulin kappa variable 4-1	IGKV4-1	-3.30523
EPH receptor A4	EPHA4	-3.30356
hydroxyprostaglandin dehydrogenase 15-(NAD)	HPGD	-3.29969
Hypothetical LOC441027	FLJ12993	-3.29903
Phospholamban	PLN	-3.2959
roundabout, axon guidance receptor, homolog 2 (Drosophila)	ROBO2	-3.27678
fatty acid binding protein 5 (psoriasis-associated) /// fatty acid binding protein 5-like 7 /// fatty acid binding protein 5-like 2	FABP5 /// FABP5L2 /// FABP5L7	-3.27613
solute carrier family 14 (urea transporter), member 1 (Kidd blood group)	SLC14A1	-3.27427
mucin 15, cell surface associated	MUC15	-3.26552
hypothetical protein LOC283859	LOC283859	-3.25881
hypothetical protein LOC283588	LOC283588	-3.25765
insulin-like growth factor binding protein 5	IGFBP5	-3.24876
thymocyte selection-associated high mobility group box	TOX	-3.227
v-kit Hardy-Zuckerman 4 feline sarcoma viral oncogene homolog	KIT	-3.22146
phospholipase A2, group IVA (cytosolic, calcium-dependent)	PLA2G4A	-3.21913
BTB (POZ) domain containing 11	BTBD11	-3.21612
hypothetical LOC400120	RP11-16L6.1	-3.20755
family with sequence similarity 107, member A	FAM107A	-3.20226
carcinoembryonic antigen-related cell adhesion molecule 1 (biliary glycoprotein)	CEACAM1	-3.2005
zinc finger protein 589	ZNF589	-3.19528
5-hydroxytryptamine (serotonin) receptor 2B	HTR2B	-3.18965
inter-alpha (globulin) inhibitor H5	ITIH5	-3.18934
hypothetical protein MGC45438	MGC45438	-3.18638
chromosome 5 open reading frame 17	C5orf17	-3.18245
leucine rich repeat and Ig domain containing 1	LINGO1	-3.14993
ring finger protein 182	RNF182	-3.13414
Forkhead box A1	FOXA1	-3.13116
SEC14-like 1 (S. cerevisiae)	SEC14L1	-3.12799
inhibitor of DNA binding 3, dominant negative helix-loop-helix protein	ID3	-3.12365
proline rich 16	PRR16	-3.11916
Kruppel-like factor 4 (gut)	KLF4	-3.11479
solute carrier family 27 (fatty acid transporter), member 2	SLC27A2	-3.11139
insulin-like growth factor binding protein-like 1	IGFBPL1	-3.09766
protocadherin gamma subfamily A, 4	PCDHGA4	-3.09309
UDP-N-acetyl-alpha-D-galactosamine:polypeptide N-acetylgalactosaminyltransferase-like 1	GALNTL1	-3.08877
vasohibin 2	VASH2	-3.07898
fibrillin 2 (congenital contractural arachnodactyly)	FBN2	-3.07808
ring finger protein 175	RNF175	-3.07427
hypothetical LOC387790	LOC387790	-3.06995
neurexin 3	NRXN3	-3.06754
forkhead box F2	FOXF2	-3.06445
solute carrier family 27 (fatty acid transporter), member 2	SLC27A2	-3.05941
alcohol dehydrogenase 1B (class I), beta polypeptide	ADH1B	-3.05685
PDZ domain containing 2	PDZD2	-3.03956
hypothetical protein KIAA1434	RP5-1022P6.2	-3.03898
RPE-spondin	RPESP	-3.03869
insulin-like growth factor 1 (somatomedin C)	IGF1	-3.03295
paired related homeobox 1	PRRX1	-3.0314
chromosome 9 open reading frame 61	C9orf61	-3.02026
BTB (POZ) domain containing 11	BTBD11	-3.00802
glutamate receptor, ionotropic, kainate 2	GRIK2	-3.00355
hairy/enhancer-of-split related with YRPW motif 1	HEY1	-3.00151
GINS complex subunit 4 (Sld5 homolog)	GINS4	-2.99534
RPE-spondin	RPESP	-2.97742
carcinoembryonic antigen-related cell adhesion molecule 1 (biliary glycoprotein)	CEACAM1	-2.96511
polycystic kidney and hepatic disease 1 (autosomal recessive)-like 1	PKHD1L1	-2.96141
tumor necrosis factor receptor superfamily, member 19	TNFRSF19	-2.95964
SIX homeobox 2	SIX2	-2.95895
Solute carrier family 14 (urea transporter), member 1 (Kidd blood group)	SLC14A1	-2.95313
KIAA2022	KIAA2022	-2.94785
src kinase associated phosphoprotein 1	SKAP1	-2.9444
trophoblast-derived noncoding RNA	TncRNA	-2.92975
aldehyde dehydrogenase 3 family, memberA1	ALDH3A1	-2.92487
peroxisome proliferator-activated receptor gamma	PPARG	-2.92434
B-cell CLL/lymphoma 2	BCL2	-2.91004
cyclin-dependent kinase inhibitor 1C (p57, Kip2)	CDKN1C	-2.90884
synaptotagmin XVII	SYT17	-2.90759
glutathione peroxidase 3 (plasma)	GPX3	-2.90699
glutamate receptor, ionotropic, kainate 2	GRIK2	-2.90423
interleukin 17 receptor D	IL17RD	-2.89369
insulin-like growth factor 1 (somatomedin C)	IGF1	-2.89277
SET and MYND domain containing 2	SMYD2	-2.89242
dystonin	DST	-2.88573
chemokine (C-X-C motif) ligand 9	CXCL9	-2.88473
ribosomal protein S6 kinase, 90kDa, polypeptide 5	RPS6KA5	-2.87658
hypothetical protein KIAA1434	RP5-1022P6.2	-2.86206
DIRAS family, GTP-binding RAS-like 2	DIRAS2	-2.85922
asporin	ASPN	-2.85797
sorbitol dehydrogenase	SORD	-2.85691
tyrosylprotein sulfotransferase 2	TPST2	-2.85055
msh homeobox 2	MSX2	-2.8431
adrenergic, beta-2-, receptor, surface	ADRB2	-2.82824
family with sequence similarity 134, member B	FAM134B	-2.81708
EPH receptor A7	EPHA7	-2.79881
nucleotide-binding oligomerization domain containing 2	NOD2	-2.7933
Transmembrane protein 56	TMEM56	-2.79292
major histocompatibility complex, class II, DP alpha 1	HLA-DPA1	-2.78907
collagen, type XIII, alpha 1	COL13A1	-2.77701
adenylate cyclase 1 (brain)	ADCY1	-2.77693
phosphoglucomutase 5	PGM5	-2.77605
myosin, heavy chain 11, smooth muscle	MYH11	-2.77592
synaptotagmin-like 4 (granuphilin-a)	SYTL4	-2.76965
prolactin-induced protein	PIP	-2.76881
carcinoembryonic antigen-related cell adhesion molecule 1 (biliary glycoprotein)	CEACAM1	-2.75092
hypothetical protein KIAA1434	RP5-1022P6.2	-2.74514
GNAS complex locus	GNAS	-2.73209
fibroblast growth factor binding protein 2	FGFBP2	-2.72194
solute carrier family 25, member 35	SLC25A35	-2.72165
dachshund homolog 1 (Drosophila)	DACH1	-2.72158
microtubule-associated protein 1B	MAP1B	-2.71638
metallothionein 1X	MT1X	-2.71552
integrator complex subunit 10	INTS10	-2.71194
inhibitor of DNA binding 1, dominant negative helix-loop-helix protein	ID1	-2.70786
four and a half LIM domains 1	FHL1	-2.70711
hairy and enhancer of split 6 (Drosophila)	HES6	-2.70476
Hypothetical protein LOC100132181	LOC100132181	-2.7013
endoplasmic reticulum aminopeptidase 2	ERAP2	-2.69953
methylcrotonoyl-Coenzyme A carboxylase 2 (beta)	MCCC2	-2.69002
immunoglobulin heavy constant alpha 1 /// immunoglobulin heavy constant gamma 1 (G1m marker) /// immunoglobulin heavy constant gamma 3 (G3m marker) /// immunoglobulin heavy constant mu /// immunoglobulin heavy variable group /// immunoglobulin heavy variable 4-31 /// similar to hCG2038920	IGHA1 /// IGHG1 /// IGHG3 /// IGHM /// IGHV4-31 /// IGHV@ /// LOC100133739	-2.68918
cellular retinoic acid binding protein 1	CRABP1	-2.68221
hydroxyprostaglandin dehydrogenase 15-(NAD)	HPGD	-2.68104
heparan sulfate (glucosamine) 3-O-sulfotransferase 1	HS3ST1	-2.67838
pleckstrin homology-like domain, family A, member 1	PHLDA1	-2.67766
heat shock 60kDa protein 1 (chaperonin)	HSPD1	-2.67705
alkaline phosphatase, placental-like 2	ALPPL2	-2.65829
immunoglobulin lambda locus	IGL@	-2.65125
EPH receptor A7	EPHA7	-2.6468
chloride channel, calcium activated, family member 4	CLCA4	-2.6395
immunoglobulin heavy constant mu	IGHM	-2.63799
progestin and adipoQ receptor family member VIII	PAQR8	-2.63701
fibroblast growth factor receptor 1 (fms-related tyrosine kinase 2, Pfeiffer syndrome)	FGFR1	-2.63375
sushi domain containing 2	SUSD2	-2.62888
cyclin-dependent kinase inhibitor 1C (p57, Kip2)	CDKN1C	-2.62503
chromosome 15 open reading frame 48	C15orf48	-2.62415
immunoglobulin kappa constant /// immunoglobulin kappa locus /// similar to Ig kappa chain V-I region HK101 precursor /// similar to Ig kappa chain V-I region HK102 precursor	IGK@ /// IGKC /// LOC647506 /// LOC650405 /// LOC652493	-2.61658
lactotransferrin	LTF	-2.61455
immunoglobulin heavy locus /// immunoglobulin heavy constant alpha 1 /// immunoglobulin heavy constant alpha 2 (A2m marker) /// immunoglobulin heavy constant delta /// immunoglobulin heavy constant gamma 1 (G1m marker) /// immunoglobulin heavy constant gamma 3 (G3m marker) /// immunoglobulin heavy constant gamma 4 (G4m marker) /// immunoglobulin heavy constant mu /// immunoglobulin heavy variable…	IGH@ /// IGHA1 /// IGHA2 /// IGHD /// IGHG1 /// IGHG3 /// IGHG4 /// IGHM /// IGHV4-31 /// LOC100126583 /// LOC100134331 /// LOC642131 /// LOC652128	-2.60755
solute carrier family 1 (glial high affinity glutamate transporter), member 3	SLC1A3	-2.60482
hairy/enhancer-of-split related with YRPW motif 1	HEY1	-2.60322
reticulon 1	RTN1	-2.60088
sal-like 1 (Drosophila)	SALL1	-2.59331
pleiotrophin (heparin binding growth factor 8, neurite growth-promoting factor 1)	PTN	-2.58683
sex comb on midleg-like 1 (Drosophila)	SCML1	-2.58354
chloride intracellular channel 3	CLIC3	-2.57593
Nuclear factor I/B	NFIB	-2.57535
hypothetical LOC441027	FLJ12993	-2.57324
histone cluster 1, H2bg /// histone cluster 1, H2bf /// histone cluster 1, H2be /// histone cluster 1, H2bi /// histone cluster 1, H2bc	HIST1H2BC /// HIST1H2BE /// HIST1H2BF /// HIST1H2BG /// HIST1H2BI	-2.56471
sperm antigen with calponin homology and coiled-coil domains 1	SPECC1	-2.55956
neurexin 3	NRXN3	-2.55428
lipase A, lysosomal acid, cholesterol esterase (Wolman disease)	LIPA	-2.55327
solute carrier family 18 (vesicular monoamine), member 2	SLC18A2	-2.55285
ribosomal protein S6 kinase, 90kDa, polypeptide 5	RPS6KA5	-2.54824
four and a half LIM domains 1	FHL1	-2.5402
tetraspanin 2	TSPAN2	-2.5382
SMAD family member 9	SMAD9	-2.53533
Immunoglobulin lambda variable group /// Immunoglobulin lambda joining 3	IGL@ /// RPL14	-2.53471
hypothetical protein LOC100130958	LOC100130958	-2.5346
PDZ domain containing 2	PDZD2	-2.53007
major histocompatibility complex, class II, DQ beta 1 /// major histocompatibility complex, class II, DQ beta 2 /// major histocompatibility complex, class II, DR beta 1 /// major histocompatibility complex, class II, DR beta 2 (pseudogene) /// major histocompatibility complex, class II, DR beta 3 /// major histocompatibility complex, class II, DR beta 4 /// major histocompatibility complex, clas…	hCG_1998957 /// HLA-DQB1 /// HLA-DQB2 /// HLA-DRB1 /// HLA-DRB2 /// HLA-DRB3 /// HLA-DRB4 /// HLA-DRB5 /// LOC100133484 /// LOC100133583 /// LOC100133661 /// LOC100133811 /// LOC730415 /// RNASE2 /// ZNF749	-2.52667
epoxide hydrolase 1, microsomal (xenobiotic)	EPHX1	-2.52384
small proline-rich protein 1A	SPRR1A	-2.52047
arachidonate 15-lipoxygenase	ALOX15	-2.51428
family with sequence similarity 69, member B	FAM69B	-2.51316
forkhead box P2	FOXP2	-2.51208
nebulette	NEBL	-2.50451
carnitine acetyltransferase	CRAT	-2.49955
NAD(P)H dehydrogenase, quinone 1	NQO1	-2.49902
phosphodiesterase 8B	PDE8B	-2.4988
immunoglobulin heavy locus /// immunoglobulin heavy constant alpha 1 /// immunoglobulin heavy constant alpha 2 (A2m marker) /// immunoglobulin heavy constant gamma 1 (G1m marker) /// immunoglobulin heavy constant gamma 3 (G3m marker) /// immunoglobulin heavy constant mu /// immunoglobulin heavy variable group /// immunoglobulin heavy variable 4-31 /// similar to hCG2038920	IGH@ /// IGHA1 /// IGHA2 /// IGHG1 /// IGHG3 /// IGHM /// IGHV4-31 /// IGHV@ /// LOC100133739	-2.49269
protocadherin beta 7	PCDHB7	-2.49155
organic solute transporter alpha	OSTalpha	-2.48588
kinesin family member 24	KIF24	-2.48346
tetratricopeptide repeat domain 6	TTC6	-2.48204
hypothetical LOC730101	LOC730101	-2.47911
Sp5 transcription factor	SP5	-2.47798
corin, serine peptidase	CORIN	-2.47722
vasohibin 2	VASH2	-2.47643
myosin, heavy chain 11, smooth muscle	MYH11	-2.47609
cyclin-dependent kinase inhibitor 1C (p57, Kip2)	CDKN1C	-2.47567
hemochromatosis	HFE	-2.47495
Transcription factor CP2-like 1	TFCP2L1	-2.47432
proline-serine-threonine phosphatase interacting protein 2	PSTPIP2	-2.47356
actin, gamma 2, smooth muscle, enteric	ACTG2	-2.47217
fibrinogen-like 2	FGL2	-2.46961
protein kinase, AMP-activated, alpha 2 catalytic subunit	PRKAA2	-2.46921
family with sequence similarity 134, member B	FAM134B	-2.46684
solute carrier family 7 (cationic amino acid transporter, y+ system), member 3	SLC7A3	-2.4596
low density lipoprotein receptor-related protein 4	LRP4	-2.45492
stratifin	SFN	-2.45249
pleiotrophin (heparin binding growth factor 8, neurite growth-promoting factor 1)	PTN	-2.45089
single-minded homolog 2 (Drosophila)	SIM2	-2.44501
polo-like kinase 2 (Drosophila)	PLK2	-2.44286
aldehyde dehydrogenase 3 family, member A2	ALDH3A2	-2.43981
sex comb on midleg-like 1 (Drosophila)	SCML1	-2.43801
family with sequence similarity 150, member B	FAM150B	-2.43732
ATPase, Na+/K+ transporting, alpha 2 (+) polypeptide	ATP1A2	-2.43724
Ras-related GTP binding D	RRAGD	-2.42852
SLIT and NTRK-like family, member 6	SLITRK6	-2.42696
phosphoinositide-3-kinase, regulatory subunit 1 (alpha)	PIK3R1	-2.42687
myocardial infarction associated transcript (non-protein coding)	MIAT	-2.41625
PDZ domain containing RING finger 3	PDZRN3	-2.41353
aldehyde dehydrogenase 3 family, member A2	ALDH3A2	-2.41252
pleckstrin homology domain containing, family G (with RhoGef domain) member 4B	PLEKHG4B	-2.41202
acyl-CoA synthetase medium-chain family member 3	ACSM3	-2.411
cyclin-dependent kinase inhibitor 1C (p57, Kip2)	CDKN1C	-2.41039
rotatin	RTTN	-2.40799
small muscle protein, X-linked	SMPX	-2.40516
immunoglobulin lambda variable 3-19	IGLV3-19	-2.40217
ankyrin repeat domain 29	ANKRD29	-2.40107
regulator of calcineurin 1	RCAN1	-2.40046
Cas-Br-M (murine) ecotropic retroviral transforming sequence b	CBLB	-2.39887
ADAM metallopeptidase with thrombospondin type 1 motif, 6	ADAMTS6	-2.39249
pleckstrin homology domain containing, family G (with RhoGef domain) member 4B	PLEKHG4B	-2.39065
transmembrane protein 35	TMEM35	-2.38986
transforming growth factor, beta 2	TGFB2	-2.38926
Glutathione S-transferase theta 1	GSTT1	-2.38838
Microtubule associated serine/threonine kinase family member 4	MAST4	-2.38682
immunoglobulin kappa constant /// immunoglobulin kappa variable 1-5 /// similar to Ig kappa chain V-I region HK101 precursor /// similar to Ig kappa chain V-I region HK102 precursor	IGKC /// IGKV1-5 /// LOC647506 /// LOC652694	-2.38541
post-GPI attachment to proteins 1	PGAP1	-2.37887
neurofascin homolog (chicken)	NFASC	-2.37821
Immunoglobulin lambda joining 3	IGL@	-2.37178
aldehyde dehydrogenase 3 family, member A2	ALDH3A2	-2.36994
small proline-rich protein 1B (cornifin)	SPRR1B	-2.36972
transmembrane protein 63A	TMEM63A	-2.36596
NLR family, pyrin domain containing 2	NLRP2	-2.36526
SLIT and NTRK-like family, member 6	SLITRK6	-2.36354
ectonucleotide pyrophosphatase/phosphodiesterase 5 (putative function)	ENPP5	-2.35745
stathmin-like 2	STMN2	-2.35667
bone morphogenetic protein receptor, type IB	BMPR1B	-2.35568
transmembrane protein 9	TMEM9	-2.3551
neuron navigator 2	NAV2	-2.35373
betacellulin	BTC	-2.35278
paired-like homeodomain 2	PITX2	-2.35198
major histocompatibility complex, class II, DP alpha 1	HLA-DPA1	-2.35141
CUG triplet repeat, RNA binding protein 2	CUGBP2	-2.34751
abhydrolase domain containing 12	ABHD12	-2.34712
somatostatin receptor 2	SSTR2	-2.34325
fibrinogen-like 2	FGL2	-2.34119
SRY (sex determining region Y)-box 2	SOX2	-2.33937
DEAD (Asp-Glu-Ala-Asp) box polypeptide 17	DDX17	-2.33905
lymphoid enhancer-binding factor 1	LEF1	-2.33835
KIAA1946	KIAA1946	-2.33818
flavin containing monooxygenase 2 (non-functional)	FMO2	-2.33563
fibroblast growth factor receptor 1 (fms-related tyrosine kinase 2, Pfeiffer syndrome)	FGFR1	-2.33387
regulating synaptic membrane exocytosis 2	RIMS2	-2.3312
NAD(P)H dehydrogenase, quinone 1	NQO1	-2.32608
Kallmann syndrome 1 sequence	KAL1	-2.31867
histone cluster 3, H2a	HIST3H2A	-2.31625
nuclear factor I/B	NFIB	-2.31522
F-box and leucine-rich repeat protein 13	FBXL13	-2.31411
serpin peptidase inhibitor, clade B (ovalbumin), member 3 /// serpin peptidase inhibitor, clade B (ovalbumin), member 4	SERPINB3 /// SERPINB4	-2.31286
brain protein 44	BRP44	-2.31001
metallophosphoesterase domain containing 2	MPPED2	-2.30662
zinc finger protein 738	ZNF738	-2.30355
FAT tumor suppressor homolog 2 (Drosophila)	FAT2	-2.30211
peroxisomal membrane protein 4, 24kDa	PXMP4	-2.30191
Down syndrome critical region gene 6	DSCR6	-2.30086
sparc/osteonectin, cwcv and kazal-like domains proteoglycan (testican) 1	SPOCK1	-2.29774
golgi integral membrane protein 4	GOLIM4	-2.29072
R3H domain containing 1	R3HDM1	-2.28729
dual oxidase maturation factor 1	DUOXA1	-2.28633
solute carrier family 7, (cationic amino acid transporter, y+ system) member 11	SLC7A11	-2.28137
Nuclear factor I/B	NFIB	-2.27744
hypothetical gene supported by BC013438	LOC375295	-2.27715
Protease, serine, 23	PRSS23	-2.27423
nuclear factor I/B	NFIB	-2.27203
kringle containing transmembrane protein 1	KREMEN1	-2.26892
interleukin 28 receptor, alpha (interferon, lambda receptor)	IL28RA	-2.26529
Matrin 3	MATR3	-2.26434
adrenergic, beta-1-, receptor	ADRB1	-2.25936
protocadherin 21	PCDH21	-2.25287
ectonucleoside triphosphate diphosphohydrolase 3	ENTPD3	-2.25181
insulin-like growth factor binding protein 5	IGFBP5	-2.25008
ADAM metallopeptidase with thrombospondin type 1 motif, 19	ADAMTS19	-2.24522
major histocompatibility complex, class II, DP alpha 1	HLA-DPA1	-2.24443
B-box and SPRY domain containing	BSPRY	-2.24418
XK, Kell blood group complex subunit-related family, member 4	XKR4	-2.23779
TRAF3 interacting protein 2	TRAF3IP2	-2.23273
hypothetical gene supported by BC072410	LOC440416	-2.23097
chemokine (C-X-C motif) ligand 3	CXCL3	-2.22976
fibrillin 2 (congenital contractural arachnodactyly)	FBN2	-2.2286
major histocompatibility complex, class II, DQ beta 1	HLA-DQB1	-2.22576
ectonucleotide pyrophosphatase/phosphodiesterase 2 (autotaxin)	ENPP2	-2.22535
keratin 6A	KRT6A	-2.22046
TRAF2 and NCK interacting kinase	TNIK	-2.21991
bone morphogenetic protein receptor, type IB	BMPR1B	-2.21868
stathmin-like 2	STMN2	-2.2084
histone cluster 1, H2bg /// histone cluster 1, H2bf /// histone cluster 1, H2be /// histone cluster 1, H2bi /// histone cluster 1, H2bc	HIST1H2BC /// HIST1H2BE /// HIST1H2BF /// HIST1H2BG /// HIST1H2BI	-2.20804
nucleosome assembly protein 1-like 2	NAP1L2	-2.20507
repetin	RPTN	-2.20463
cholinergic receptor, nicotinic, alpha 3	CHRNA3	-2.20332
axin 2 (conductin, axil)	AXIN2	-2.20287
solute carrier family 2 (facilitated glucose transporter), member 12	SLC2A12	-2.19918
paired related homeobox 1	PRRX1	-2.19864
glutathione peroxidase 3 (plasma)	GPX3	-2.19843
cell division cycle associated 7	CDCA7	-2.19818
solute carrier family 7, (cationic amino acid transporter, y+ system) member 11	SLC7A11	-2.19548
EPH receptor A4	EPHA4	-2.19226
small nuclear ribonucleoprotein polypeptide N	SNRPN	-2.19187
somatostatin receptor 2	SSTR2	-2.18849
wingless-type MMTV integration site family, member 16	WNT16	-2.18795
regulator of G-protein signaling 5	RGS5	-2.18668
endoplasmic reticulum aminopeptidase 2	ERAP2	-2.18571
dachshund homolog 1 (Drosophila)	DACH1	-2.1847
pleckstrin homology-like domain, family A, member 1	PHLDA1	-2.18259
cytochrome P450, family 2, subfamily R, polypeptide 1	CYP2R1	-2.18197
hypothetical protein LOC284837	LOC284837	-2.18048
zinc and ring finger 3	ZNRF3	-2.1784
LIM domain only 3 (rhombotin-like 2)	LMO3	-2.17426
chromosome 1 open reading frame 217	C1orf217	-2.17346
nuclear receptor subfamily 2, group E, member 3	NR2E3	-2.17265
glycine-N-acyltransferase-like 2	GLYATL2	-2.17102
chordin-like 1	CHRDL1	-2.17039
KIAA1324	KIAA1324	-2.16995
CDC14 cell division cycle 14 homolog A (S. cerevisiae)	CDC14A	-2.16933
gastrin-releasing peptide	GRP	-2.16931
acyl-CoA synthetase long-chain family member 4	ACSL4	-2.16756
hypothetical protein LOC285535	LOC285535	-2.16692
osteoglycin	OGN	-2.16354
clusterin-like 1 (retinal)	CLUL1	-2.16003
F-box protein 28	FBXO28	-2.15707
G protein-coupled receptor 155	GPR155	-2.15402
synaptopodin 2	SYNPO2	-2.14843
KIAA0888 protein	KIAA0888	-2.1451
nuclear factor I/B	NFIB	-2.1449
solute carrier organic anion transporter family, member 2A1	SLCO2A1	-2.14397
serpin peptidase inhibitor, clade A (alpha-1 antiproteinase, antitrypsin), member 5	SERPINA5	-2.14324
clusterin	CLU	-2.14013
pleiotrophin (heparin binding growth factor 8, neurite growth-promoting factor 1)	PTN	-2.13902
immunoglobulin lambda locus /// immunoglobulin lambda constant 1 (Mcg marker) /// immunoglobulin lambda variable 2-23 /// immunoglobulin lambda variable 2-18 /// immunoglobulin lambda variable 2-11	IGL@ /// IGLC1 /// IGLV2-11 /// IGLV2-18 /// IGLV2-23	-2.1387
ets homologous factor	EHF	-2.13828
iroquois homeobox 3	IRX3	-2.1374
msh homeobox 2	MSX2	-2.13738
PDZ domain containing 2	PDZD2	-2.13733
immunoglobulin heavy constant delta	IGHD	-2.13564
somatostatin receptor 2	SSTR2	-2.13381
transducin-like enhancer of split 2 (E(sp1) homolog, Drosophila)	TLE2	-2.13214
dual specificity phosphatase 10	DUSP10	-2.12703
A kinase (PRKA) anchor protein (yotiao) 9	AKAP9	-2.12685
carboxypeptidase A3 (mast cell)	CPA3	-2.12608
transducin-like enhancer of split 2 (E(sp1) homolog, Drosophila)	TLE2	-2.12435
hypothetical LOC645323	LOC645323	-2.12367
kinesin-associated protein 3	KIFAP3	-2.11951
REC8 homolog (yeast)	REC8	-2.11809
carcinoembryonic antigen-related cell adhesion molecule 1 (biliary glycoprotein)	CEACAM1	-2.11788
calcium/calmodulin-dependent protein kinase ID	CAMK1D	-2.11747
transmembrane protein 132E	TMEM132E	-2.11571
zinc finger protein 608	ZNF608	-2.11568
immunoglobulin lambda locus /// immunoglobulin lambda variable 3-19	IGL@ /// IGLV3-19	-2.11446
sorbitol dehydrogenase	SORD	-2.11392
protein tyrosine phosphatase, receptor type, f polypeptide (PTPRF), interacting protein (liprin), alpha 4	PPFIA4	-2.11317
KIAA1274	KIAA1274	-2.1114
neuron navigator 2	NAV2	-2.11079
major histocompatibility complex, class II, DQ beta 1 /// major histocompatibility complex, class II, DQ beta 2 /// major histocompatibility complex, class II, DR beta 1 /// major histocompatibility complex, class II, DR beta 2 (pseudogene) /// major histocompatibility complex, class II, DR beta 3 /// major histocompatibility complex, class II, DR beta 4 /// major histocompatibility complex, clas…	hCG_1998957 /// HLA-DQB1 /// HLA-DQB2 /// HLA-DRB1 /// HLA-DRB2 /// HLA-DRB3 /// HLA-DRB4 /// HLA-DRB5 /// LOC100133484 /// LOC100133583 /// LOC100133661 /// LOC100133811 /// LOC730415 /// RNASE2 /// ZNF749	-2.10916
insulin-like growth factor 1 (somatomedin C)	IGF1	-2.10753
chromosome 6 open reading frame 170	C6orf170	-2.10671
synaptic vesicle glycoprotein 2A	SV2A	-2.10477
major histocompatibility complex, class II, DR alpha	HLA-DRA	-2.10369
cytochrome P450, family 4, subfamily B, polypeptide 1	CYP4B1	-2.10267
G protein-coupled receptor kinase 4	GRK4	-2.10235
four and a half LIM domains 1	FHL1	-2.10213
SEC14-like 1 (S. cerevisiae)	SEC14L1	-2.10074
centlein, centrosomal protein	CNTLN	-2.09863
solute carrier family 15 (H+/peptide transporter), member 2	SLC15A2	-2.09857
S100 calcium binding protein A7	S100A7	-2.0976
protein kinase, AMP-activated, alpha 2 catalytic subunit	PRKAA2	-2.09461
STEAP family member 3	STEAP3	-2.09243
ectonucleoside triphosphate diphosphohydrolase 3	ENTPD3	-2.09172
Shugoshin-like 1 (S. pombe)	SGOL1	-2.09161
heterogeneous nuclear ribonucleoprotein U (scaffold attachment factor A)	HNRNPU	-2.08933
roundabout, axon guidance receptor, homolog 1 (Drosophila)	ROBO1	-2.08453
transmembrane protein 16A	TMEM16A	-2.08404
KIAA1466 gene	KIAA1466	-2.07955
B-cell CLL/lymphoma 11A (zinc finger protein)	BCL11A	-2.0791
immunoglobulin lambda variable 2-23 /// immunoglobulin lambda variable 2-18 /// immunoglobulin lambda variable 2-11	IGLV2-11 /// IGLV2-18 /// IGLV2-23	-2.07892
Hypothetical protein LOC100132181	LOC100132181	-2.07784
solute carrier family 26, member 7	SLC26A7	-2.07715
sperm antigen with calponin homology and coiled-coil domains 1	SPECC1	-2.07671
EPH receptor A4	EPHA4	-2.07235
Kruppel-like factor 12	KLF12	-2.07102
fibronectin type III domain containing 3A	FNDC3A	-2.07053
phosphoinositide-3-kinase, regulatory subunit 1 (alpha)	PIK3R1	-2.06982
forkhead box P2	FOXP2	-2.06764
zinc finger protein 286A	ZNF286A	-2.06697
Family with sequence similarity 84, member A	FAM84A	-2.06391
chemokine (C motif) ligand 1	XCL1	-2.062
chemokine (C-X-C motif) ligand 10	CXCL10	-2.06026
NAD(P)H dehydrogenase, quinone 1	NQO1	-2.05517
tachykinin 3 (neuromedin K, neurokinin beta)	TAC3	-2.05397
synaptotagmin-like 4 (granuphilin-a)	SYTL4	-2.0537
transcription elongation regulator 1	TCERG1	-2.0525
hypothetical LOC645323	LOC645323	-2.05142
transmembrane protein 163	TMEM163	-2.04844
Chromosome 9 open reading frame 45	STRBP	-2.04415
fibroblast growth factor receptor 2 (bacteria-expressed kinase, keratinocyte growth factor receptor, craniofacial dysostosis 1, Crouzon syndrome, Pfeiffer syndrome, Jackson-Weiss syndrome)	FGFR2	-2.0427
protocadherin alpha 9	PCDHA9	-2.04108
acyl-Coenzyme A dehydrogenase, long chain	ACADL	-2.04058
BMX non-receptor tyrosine kinase	BMX	-2.03937
patatin-like phospholipase domain containing 3	PNPLA3	-2.0383
hypothetical LOC641928	FLJ16734	-2.03779
VAMP (vesicle-associated membrane protein)-associated protein A, 33kDa	VAPA	-2.03774
arsenic (+3 oxidation state) methyltransferase	AS3MT	-2.03734
chromosome X open reading frame 56	CXorf56	-2.03733
DIRAS family, GTP-binding RAS-like 3	DIRAS3	-2.0357
Kruppel-like factor 4 (gut)	KLF4	-2.03478
peroxisomal membrane protein 4, 24kDa	PXMP4	-2.03463
immunoglobulin lambda locus	IGL@	-2.03459
metallothionein 1X	MT1X	-2.03399
naked cuticle homolog 1 (Drosophila)	NKD1	-2.03352
calbindin 1, 28kDa	CALB1	-2.03164
prostaglandin E receptor 2 (subtype EP2), 53kDa	PTGER2	-2.02979
calcium/calmodulin-dependent protein kinase ID	CAMK1D	-2.02871
renin	REN	-2.02824
MAP/microtubule affinity-regulating kinase 1	MARK1	-2.02775
ADP-ribosylation factor-like 4D	ARL4D	-2.0266
folate hydrolase (prostate-specific membrane antigen) 1	FOLH1	-2.02552
adenylate cyclase 1 (brain)	ADCY1	-2.02522
osteoglycin	OGN	-2.02469
ring finger protein 183	RNF183	-2.02301
hydroxysteroid (17-beta) dehydrogenase 3	HSD17B3	-2.02277
ISG15 ubiquitin-like modifier	ISG15	-2.01896
stratifin	SFN	-2.0181
transmembrane protein 63A	TMEM63A	-2.01552
alpha-methylacyl-CoA racemase /// C1q and tumor necrosis factor related protein 3	AMACR /// C1QTNF3	-2.01536
immunoglobulin lambda joining 3	IGLJ3	-2.01476
heterogeneous nuclear ribonucleoprotein U (scaffold attachment factor A)	HNRNPU	-2.01409
protein tyrosine phosphatase, non-receptor type 22 (lymphoid)	PTPN22	-2.01395
dystonin	DST	-2.01259
solute carrier family 9 (sodium/hydrogen exchanger), member 3 regulator 1	SLC9A3R1	-2.01226
trichorhinophalangeal syndrome I	TRPS1	-2.01153
carcinoembryonic antigen-related cell adhesion molecule 7	CEACAM7	-2.0092
catenin (cadherin-associated protein), alpha 2	CTNNA2	-2.00534
hypothetical FLJ13197 /// hypothetical protein LOC100132861	FLJ13197 /// LOC100132861	-2.0051
cathepsin B	CTSB	-2.00193
phenylalanyl-tRNA synthetase, beta subunit	FARSB	-2.00145
kelch domain containing 6	KLHDC6	-1.99942
progestin and adipoQ receptor family member VIII	PAQR8	-1.99506
transmembrane protein 132A	TMEM132A	-1.9927
acyl-Coenzyme A dehydrogenase, long chain	ACADL	-1.99208
GULP, engulfment adaptor PTB domain containing 1	GULP1	-1.99097
protein phosphatase 1, regulatory (inhibitor) subunit 12B	PPP1R12B	-1.99029
NudC domain containing 1	NUDCD1	-1.98903
HRAS-like suppressor	HRASLS	-1.98877
myosin light chain kinase 3	MYLK3	-1.98841
brain protein 44	BRP44	-1.98693
septin 4	SEPT4	-1.98654
spleen tyrosine kinase	SYK	-1.9865
hypothetical protein LOC649305	LOC649305	-1.98609
plexin A4	PLXNA4	-1.98491
homolog of rat pragma of Rnd2	PRAGMIN	-1.98386
prospero homeobox 1	PROX1	-1.98364
ST6 (alpha-N-acetyl-neuraminyl-2,3-beta-galactosyl-1,3)-N-acetylgalactosaminide alpha-2,6-sialyltransferase 3	ST6GALNAC3	-1.98347
KIAA1147	KIAA1147	-1.98227
solute carrier family 18 (vesicular monoamine), member 2	SLC18A2	-1.98141
complement factor H	CFH	-1.98074
Major histocompatibility complex, class II, DR beta 3	HLA-DRB1	-1.98032
NudC domain containing 1	NUDCD1	-1.97932
paired-like homeodomain 1	PITX1	-1.97885
keratin 13	KRT13	-1.9781
major histocompatibility complex, class II, DR alpha	HLA-DRA	-1.97793
IQ motif containing GTPase activating protein 2	IQGAP2	-1.97574
hypothetical protein LOC90246	LOC90246	-1.97383
regulator of G-protein signaling 5	RGS5	-1.97325
myoglobin	MB	-1.96847
collagen, type XIV, alpha 1	COL14A1	-1.968
mex-3 homolog A (C. elegans)	MEX3A	-1.96692
placenta-specific 2 /// similar to placenta-specific 2	LOC100129680 /// PLAC2	-1.96658
phosphoribosyl transferase domain containing 1	PRTFDC1	-1.96556
hypothetical protein MGC32805	MGC32805	-1.96517
myosin, heavy chain 11, smooth muscle	MYH11	-1.96472
KIAA2022	KIAA2022	-1.9646
chemokine (C motif) ligand 1 /// chemokine (C motif) ligand 2	XCL1 /// XCL2	-1.96274
SLIT and NTRK-like family, member 6	SLITRK6	-1.96008
fatty acid binding protein 4, adipocyte	FABP4	-1.9599
ets homologous factor	EHF	-1.95799
transmembrane protease, serine 13	TMPRSS13	-1.95651
T cell receptor beta constant 1	TRBC1	-1.95514
MAP/microtubule affinity-regulating kinase 1	MARK1	-1.95415
rotatin	RTTN	-1.95392
Thyroid adenoma associated	THADA	-1.95227
cytochrome b5 reductase 1	CYB5R1	-1.95173
TL132 protein	LOC220594	-1.95074
signal transducer and activator of transcription 1, 91kDa	STAT1	-1.95073
stratifin	SFN	-1.94894
major histocompatibility complex, class II, DQ beta 1 /// major histocompatibility complex, class II, DQ beta 2 /// major histocompatibility complex, class II, DR beta 1 /// major histocompatibility complex, class II, DR beta 2 (pseudogene) /// major histocompatibility complex, class II, DR beta 3 /// major histocompatibility complex, class II, DR beta 4 /// major histocompatibility complex, clas…	hCG_1998957 /// HLA-DQB1 /// HLA-DQB2 /// HLA-DRB1 /// HLA-DRB2 /// HLA-DRB3 /// HLA-DRB4 /// HLA-DRB5 /// LOC100133484 /// LOC100133583 /// LOC100133661 /// LOC100133811 /// LOC730415 /// RNASE2 /// ZNF749	-1.94887
histone cluster 2, H2be	HIST2H2BE	-1.9486
jagged 1 (Alagille syndrome)	JAG1	-1.94724
aldo-keto reductase family 1, member C3 (3-alpha hydroxysteroid dehydrogenase, type II)	AKR1C3	-1.94564
glutaredoxin (thioltransferase)	GLRX	-1.94504
Hypothetical LOC100131938	PBX1	-1.94407
regulator of G-protein signaling 5	RGS5	-1.94321
hypothetical LOC645566	FLJ45482	-1.94282
major histocompatibility complex, class II, DP beta 1	HLA-DPB1	-1.93915
hypothetical protein LOC644186	LOC644186	-1.93873
Norrie disease (pseudoglioma)	NDP	-1.93831
inositol(myo)-1(or 4)-monophosphatase 2	IMPA2	-1.93802
kelch-like 31 (Drosophila)	KLHL31	-1.93776
acyl-CoA synthetase medium-chain family member 3	ACSM3	-1.93731
uveal autoantigen with coiled-coil domains and ankyrin repeats	UACA	-1.9371
dynein, axonemal, heavy chain 14	DNAH14	-1.93687
sorting and assembly machinery component 50 homolog (S. cerevisiae) /// hypothetical protein LOC100131861	LOC100131861 /// SAMM50	-1.93648
hypothetical protein FLJ14082	FLJ14082	-1.93614
polymerase (DNA directed), theta	POLQ	-1.93597
metallothionein 1G	MT1G	-1.93586
patatin-like phospholipase domain containing 3	PNPLA3	-1.93563
Hypothetical gene supported by AK126569	FLJ44606	-1.93556
BCL2/adenovirus E1B 19kD interacting protein like	BNIPL	-1.93423
hypothetical protein FLJ14712	FLJ14712	-1.93392
dual oxidase 1	DUOX1	-1.93223
Rho-related BTB domain containing 1	RHOBTB1	-1.9298
brain-derived neurotrophic factor	BDNF	-1.92896
homeobox B7	HOXB7	-1.92813
chromosome 2 open reading frame 65	C2orf65	-1.92797
family with sequence similarity 40, member B	FAM40B	-1.92774
Stress-associated endoplasmic reticulum protein family member 2	SERP2	-1.92731
bolA homolog 1 (E. coli)	BOLA1	-1.92656
fibroblast growth factor 14	FGF14	-1.92532
acid phosphatase 6, lysophosphatidic	ACP6	-1.92429
thrombospondin, type I, domain containing 7B	THSD7B	-1.92423
1-acylglycerol-3-phosphate O-acyltransferase 9	AGPAT9	-1.92285
receptor accessory protein 1	REEP1	-1.92142
Mdm2, transformed 3T3 cell double minute 2, p53 binding protein (mouse) binding protein, 104kDa	MTBP	-1.91977
chromosome 20 open reading frame 103	C20orf103	-1.91965
5-hydroxytryptamine (serotonin) receptor 3A	HTR3A	-1.91801
neurotensin	NTS	-1.91769
EF-hand domain family, member A2	EFHA2	-1.91766
sorting and assembly machinery component 50 homolog (S. cerevisiae)	SAMM50	-1.91661
calbindin 1, 28kDa	CALB1	-1.91612
LIM and senescent cell antigen-like domains 3-like	LOC440895	-1.91585
hypothetical protein FLJ13744	FLJ13744	-1.91505
SIX homeobox 2	SIX2	-1.91323
crystallin, beta B1	CRYBB1	-1.91295
hypothetical protein LOC283070	LOC283070	-1.91295
Pelota homolog (Drosophila)	PELO	-1.91174
SH3-binding domain kinase 1	SBK1	-1.91164
tRNA aspartic acid methyltransferase 1	TRDMT1	-1.91161
sal-like 1 (Drosophila)	SALL1	-1.90911
EPH receptor A4	EPHA4	-1.90807
potassium large conductance calcium-activated channel, subfamily M, alpha member 1	KCNMA1	-1.90722
Hypothetical protein LOC441528	LOC389906	-1.90709
thioredoxin interacting protein	TXNIP	-1.90618
CUE domain containing 1	CUEDC1	-1.9053
chromosome 1 open reading frame 186	C1orf186	-1.90497
nuclear receptor binding SET domain protein 1	NSD1	-1.90442
ectonucleotide pyrophosphatase/phosphodiesterase 5 (putative function)	ENPP5	-1.90406
NK2 transcription factor related, locus 5 (Drosophila)	NKX2-5	-1.90387
cell division cycle associated 7	CDCA7	-1.90378
otoancorin	OTOA	-1.9026
Bromodomain containing 7	BRD7	-1.9026
folate hydrolase (prostate-specific membrane antigen) 1	FOLH1	-1.90243
dystonin	DST	-1.9007
NLR family, CARD domain containing 5	NLRC5	-1.90002
tripartite motif-containing 31	TRIM31	-1.89952
schlafen family member 13	SLFN13	-1.89844
sperm antigen with calponin homology and coiled-coil domains 1	SPECC1	-1.89839
four and a half LIM domains 1	FHL1	-1.89825
parathyroid hormone-like hormone	PTHLH	-1.89663
solute carrier family 15 (H+/peptide transporter), member 2	SLC15A2	-1.8965
serine peptidase inhibitor-like, with Kunitz and WAP domains 1 (eppin)	SPINLW1	-1.89648
oxysterol binding protein-like 6	OSBPL6	-1.89611
histone cluster 1, H4j	HIST1H4J	-1.89572
chromosome 9 open reading frame 19	C9orf19	-1.8951
podocalyxin-like 2	PODXL2	-1.89441
myelin protein zero-like 1	MPZL1	-1.89415
Coiled-coil domain containing 91	CCDC91	-1.89329
coiled-coil domain containing 150	CCDC150	-1.89325
protein phosphatase 2 (formerly 2A), regulatory subunit B, gamma isoform	PPP2R2C	-1.89272
forkhead box C1	FOXC1	-1.89137
chromosome 14 open reading frame 145	C14orf145	-1.89055
latrophilin 3	LPHN3	-1.88935
RAB GTPase activating protein 1	RABGAP1	-1.88923
insulin-like growth factor binding protein 3	IGFBP3	-1.88899
HBS1-like (S. cerevisiae)	HBS1L	-1.88894
immunoglobulin superfamily, member 9	IGSF9	-1.88842
cysteine-rich protein 1 (intestinal)	CRIP1	-1.88756
mannan-binding lectin serine peptidase 1 (C4/C2 activating component of Ra-reactive factor)	MASP1	-1.88733
Cas-Br-M (murine) ecotropic retroviral transforming sequence b	CBLB	-1.88579
heat shock 70kDa protein 2	HSPA2	-1.88436
ATPase, Ca++ transporting, type 2C, member 2	ATP2C2	-1.88433
sterile alpha motif and leucine zipper containing kinase AZK	ZAK	-1.88399
adrenergic, beta, receptor kinase 2	ADRBK2	-1.88385
crystallin, lambda 1	CRYL1	-1.88181
growth-inhibiting protein 26	PSMAL	-1.881
tumor-associated calcium signal transducer 2	TACSTD2	-1.88096
TXK tyrosine kinase	TXK	-1.87962
four and a half LIM domains 1	FHL1	-1.8785
low density lipoprotein receptor class A domain containing 3	LDLRAD3	-1.87794
DAZ interacting protein 1	DZIP1	-1.87784
nuclear factor (erythroid-derived 2)-like 3	NFE2L3	-1.87763
phosducin-like 3	PDCL3	-1.87737
Wolfram syndrome 1 (wolframin)	WFS1	-1.87555
chromosome 1 open reading frame 187	C1orf187	-1.87467
Septin 7	SEPT7	-1.87342
zinc finger protein 44	ZNF44	-1.87341
gamma-aminobutyric acid (GABA) A receptor, pi	GABRP	-1.87264
hairy and enhancer of split 4 (Drosophila)	HES4	-1.87261
nephroblastoma overexpressed gene	NOV	-1.87111
reticulon 4 interacting protein 1	RTN4IP1	-1.87074
spleen tyrosine kinase	SYK	-1.8683
Hypothetical LOC728987	LOC728987	-1.86791
cell adhesion molecule 1	CADM1	-1.86748
clusterin	CLU	-1.86703
granzyme A (granzyme 1, cytotoxic T-lymphocyte-associated serine esterase 3)	GZMA	-1.86703
solute carrier organic anion transporter family, member 3A1	SLCO3A1	-1.86465
UDP-N-acetyl-alpha-D-galactosamine:polypeptide N-acetylgalactosaminyltransferase 4 (GalNAc-T4)	GALNT4	-1.86227
lectin, galactoside-binding, soluble, 3 binding protein	LGALS3BP	-1.86199
similar to Ig kappa chain V-I region HK102 precursor	LOC652493	-1.86161
heat shock 27kDa protein 1	HSPB1	-1.86135
MRE11 meiotic recombination 11 homolog A (S. cerevisiae)	MRE11A	-1.86066
jagged 1 (Alagille syndrome)	JAG1	-1.85863
CD74 molecule, major histocompatibility complex, class II invariant chain	CD74	-1.8585
BTG family, member 3	BTG3	-1.85845
exportin 7	XPO7	-1.85739
mitogen-activated protein kinase kinase 6	MAP2K6	-1.85721
zinc finger protein 493	ZNF493	-1.85669
phosphoinositide-3-kinase, regulatory subunit 1 (alpha)	PIK3R1	-1.8555
major histocompatibility complex, class II, DM alpha	HLA-DMA	-1.85543
abhydrolase domain containing 2	ABHD2	-1.8546
Rho family GTPase 2	RND2	-1.85449
Jagged 1 (Alagille syndrome)	JAG1	-1.85444
homeobox B7	HOXB7	-1.85436
schlafen family member 12	SLFN12	-1.85418
Src homology 2 domain containing E	SHE	-1.85246
sarcoglycan, delta (35kDa dystrophin-associated glycoprotein)	SGCD	-1.85233
Pelota homolog (Drosophila)	PELO	-1.85179
gametogenetin binding protein 2	GGNBP2	-1.85115
jagged 1 (Alagille syndrome)	JAG1	-1.85026
tudor domain containing 10	TDRD10	-1.84968
chromosome 9 open reading frame 19	C9orf19	-1.84954
nasal embryonic LHRH factor	NELF	-1.84926
chromosome 9 open reading frame 58	C9orf58	-1.8485
CUG triplet repeat, RNA binding protein 2	CUGBP2	-1.84812
Purkinje cell protein 4 like 1	PCP4L1	-1.84744
glutamate-ammonia ligase (glutamine synthetase)	GLUL	-1.84623
folate hydrolase (prostate-specific membrane antigen) 1	FOLH1	-1.84521
leucine carboxyl methyltransferase 2	LCMT2	-1.84457
glycosyltransferase 8 domain containing 4	GLT8D4	-1.84434
Similar to RIKEN cDNA 4921524J17	LOC388272	-1.84367
CDC14 cell division cycle 14 homolog A (S. cerevisiae)	CDC14A	-1.84274
immunoglobulin lambda locus	IGL@	-1.84269
serine/threonine kinase 33	STK33	-1.8425
glypican 3	GPC3	-1.8425
metallothionein 1E /// metallothionein 1H /// metallothionein 1M /// metallothionein 1 pseudogene 2	MT1E /// MT1H /// MT1M /// MT1P2	-1.84077
gamma-aminobutyric acid (GABA) A receptor, beta 3	GABRB3	-1.8398
heat shock 70kDa protein 12A	HSPA12A	-1.83946
crystallin, beta B2 /// crystallin, beta B2 pseudogene 1	CRYBB2 /// CRYBB2P1	-1.8382
protocadherin beta 10	PCDHB10	-1.83691
IMP2 inner mitochondrial membrane peptidase-like (S. cerevisiae)	IMMP2L	-1.83661
transmembrane protein 67	TMEM67	-1.83632
sterile alpha motif and leucine zipper containing kinase AZK	ZAK	-1.8359
ets homologous factor	EHF	-1.83521
Chromosome 6 open reading frame 204	C6orf204	-1.83497
phosphoribosyl pyrophosphate synthetase 2	PRPS2	-1.83492
spleen tyrosine kinase	SYK	-1.83357
methyl-CpG binding domain protein 2	MBD2	-1.83321
nebulette	NEBL	-1.83029
transducin-like enhancer of split 3 (E(sp1) homolog, Drosophila)	TLE3	-1.82912
zinc finger protein 519	ZNF519	-1.82861
major histocompatibility complex, class I-related	MR1	-1.8279
propionyl Coenzyme A carboxylase, alpha polypeptide	PCCA	-1.82718
glutamate-ammonia ligase (glutamine synthetase)	GLUL	-1.82716
CDC42 effector protein (Rho GTPase binding) 3	CDC42EP3	-1.82687
microtubule associated serine/threonine kinase family member 4 /// hypothetical protein LOC100128443	LOC100128443 /// MAST4	-1.82658
hypothetical locus LOC401237	FLJ22536	-1.82527
G protein-coupled receptor 83	GPR83	-1.82455
hypothetical LOC645460	FLJ44342	-1.82428
hCG1815491	hCG_1815491	-1.82377
neuron navigator 2	NAV2	-1.82256
UDP-Gal:betaGlcNAc beta 1,4- galactosyltransferase, polypeptide 1	B4GALT1	-1.82233
prematurely terminated mRNA decay factor-like	LOC91431	-1.82228
telomeric repeat binding factor (NIMA-interacting) 1	TERF1	-1.82163
neuronal PAS domain protein 3	NPAS3	-1.81971
vimentin	VIM	-1.81948
zinc finger, MYM-type 2	ZMYM2	-1.81799
interleukin 33	IL33	-1.81798
LIM and senescent cell antigen-like domains 1	LIMS1	-1.81732
glutaminyl-peptide cyclotransferase (glutaminyl cyclase)	QPCT	-1.8172
homeobox B6	HOXB6	-1.81638
ankyrin repeat domain 35	ANKRD35	-1.81529
mex-3 homolog A (C. elegans)	MEX3A	-1.81524
protocadherin beta 2	PCDHB2	-1.81335
Transmembrane protein 56	TMEM56	-1.81325
Hypothetical LOC401074	LOC401074	-1.81321
Nance-Horan syndrome (congenital cataracts and dental anomalies)	NHS	-1.81226
NDRG family member 2	NDRG2	-1.81151
zinc finger protein 93	ZNF93	-1.80742
spindlin family, member 3	SPIN3	-1.80675
DEAD (Asp-Glu-Ala-Asp) box polypeptide 52	DDX52	-1.8047
relaxin/insulin-like family peptide receptor 1	RXFP1	-1.80427
protease, serine, 23	PRSS23	-1.80359
syntaxin 19	STX19	-1.80282
torsin family 3, member A	TOR3A	-1.80105
integrator complex subunit 10	INTS10	-1.80033
protor-2	FLJ14213	-1.79975
myelin protein zero-like 1	MPZL1	-1.79753
interleukin 20 receptor, alpha	IL20RA	-1.79746
contactin associated protein-like 2	CNTNAP2	-1.79665
Sorbin and SH3 domain containing 2	SORBS2	-1.79641
zinc finger protein 286A	ZNF286A	-1.79624
ELL associated factor 2	EAF2	-1.79603
HLA complex P5	HCP5	-1.79591
protein phosphatase 2 (formerly 2A), regulatory subunit B, gamma isoform	PPP2R2C	-1.79562
netrin 1	NTN1	-1.79448
potassium large conductance calcium-activated channel, subfamily M, alpha member 1	KCNMA1	-1.79436
CUG triplet repeat, RNA binding protein 2	CUGBP2	-1.79434
SEC14-like 1 (S. cerevisiae)	SEC14L1	-1.79338
Rho guanine nucleotide exchange factor (GEF) 3	ARHGEF3	-1.79328
v-maf musculoaponeurotic fibrosarcoma oncogene homolog (avian)	MAF	-1.79183
cathepsin B	CTSB	-1.79097
Suppression of tumorigenicity 7 like	ST7L	-1.79077
latent transforming growth factor beta binding protein 1	LTBP1	-1.78913
SH3 domain containing ring finger 2	SH3RF2	-1.78772
fibronectin leucine rich transmembrane protein 3	FLRT3	-1.78741
B-cell CLL/lymphoma 11A (zinc finger protein)	BCL11A	-1.78725
telomeric repeat binding factor (NIMA-interacting) 1	TERF1	-1.78631
hypothetical protein LOC641518	LOC641518	-1.7853
endoplasmic reticulum aminopeptidase 2	ERAP2	-1.78482
hypothetical gene supported by BC009385	LOC400043	-1.78465
nuclear factor I/B	NFIB	-1.78455
SMAD family member 1	SMAD1	-1.78414
midkine (neurite growth-promoting factor 2)	MDK	-1.7836
Programmed cell death 6 pseudogene /// Regulator of G-protein signaling 8	LOC728613 /// RGS8	-1.78282
ligand of numb-protein X 1	LNX1	-1.78203
acyl-CoA synthetase short-chain family member 3	ACSS3	-1.78122
phosphatidic acid phosphatase type 2B	PPAP2B	-1.78084
LIM and senescent cell antigen-like domains 3-like	LOC440895	-1.78081
adhesion molecule with Ig-like domain 1	AMIGO1	-1.78068
defensin, beta 1	DEFB1	-1.77932
immediate early response 5	IER5	-1.77888
trichorhinophalangeal syndrome I	TRPS1	-1.77799
Hypothetical protein LOC283070	LOC283070	-1.77729
STEAP family member 3	STEAP3	-1.77596
trichorhinophalangeal syndrome I	TRPS1	-1.77481
phytanoyl-CoA 2-hydroxylase	PHYH	-1.77473
major histocompatibility complex, class II, DQ beta 1 /// major histocompatibility complex, class II, DQ beta 2 /// major histocompatibility complex, class II, DR beta 1 /// major histocompatibility complex, class II, DR beta 2 (pseudogene) /// major histocompatibility complex, class II, DR beta 3 /// major histocompatibility complex, class II, DR beta 4 /// major histocompatibility complex, clas…	hCG_1998957 /// HLA-DQB1 /// HLA-DQB2 /// HLA-DRB1 /// HLA-DRB2 /// HLA-DRB3 /// HLA-DRB4 /// HLA-DRB5 /// LOC100133484 /// LOC100133583 /// LOC100133661 /// LOC100133811 /// LOC730415 /// RNASE2 /// ZNF749	-1.77472
fibroblast growth factor 4 (heparin secretory transforming protein 1, Kaposi sarcoma oncogene)	FGF4	-1.77449
SEC14-like 5 (S. cerevisiae)	SEC14L5	-1.77325
phosphodiesterase 7A	PDE7A	-1.77322
spastic ataxia of Charlevoix-Saguenay (sacsin)	SACS	-1.77296
golgi integral membrane protein 4	GOLIM4	-1.77092
growth differentiation factor 5	GDF5	-1.77085
synaptopodin 2	SYNPO2	-1.77082
UTP20, small subunit (SSU) processome component, homolog (yeast)	UTP20	-1.77009
Teashirt zinc finger homeobox 2	TSHZ2	-1.76947
SEC14-like 4 (S. cerevisiae)	SEC14L4	-1.76905
pre-B-cell leukemia homeobox 1	PBX1	-1.76884
zinc finger protein 423	ZNF423	-1.76858
chromosome 20 open reading frame 56	C20orf56	-1.76852
naked cuticle homolog 2 (Drosophila)	NKD2	-1.76729
proteasome (prosome, macropain) subunit, beta type, 9 (large multifunctional peptidase 2)	PSMB9	-1.76586
tudor and KH domain containing	TDRKH	-1.76541
GULP, engulfment adaptor PTB domain containing 1	GULP1	-1.76522
hypothetical LOC645460	FLJ44342	-1.76484
schlafen family member 13	SLFN13	-1.76436
Zinc finger protein 542 /// CDNA FLJ45377 fis, clone BRHIP3019956	ZNF542	-1.76384
centrosomal protein 152kDa	CEP152	-1.76161
myelin protein zero-like 1	MPZL1	-1.7616
oxoglutarate dehydrogenase-like	OGDHL	-1.7607
Chromodomain helicase DNA binding protein 9	CHD9	-1.76013
peroxisomal membrane protein 4, 24kDa	PXMP4	-1.76009
immunoglobulin heavy locus /// immunoglobulin heavy constant alpha 1 /// immunoglobulin heavy constant alpha 2 (A2m marker) /// immunoglobulin heavy constant gamma 1 (G1m marker) /// immunoglobulin heavy constant gamma 2 (G2m marker) /// immunoglobulin heavy constant gamma 3 (G3m marker) /// immunoglobulin heavy constant mu /// immunoglobulin heavy variable 4-31 /// similar to Ig heavy chain V-II…	IGH@ /// IGHA1 /// IGHA2 /// IGHG1 /// IGHG2 /// IGHG3 /// IGHM /// IGHV4-31 /// LOC100126583 /// LOC100133739 /// LOC652494	-1.75952
beta-site APP-cleaving enzyme 2	BACE2	-1.75859
sterile alpha motif and leucine zipper containing kinase AZK	ZAK	-1.75749
regulator of G-protein signaling 5	RGS5	-1.75666
family with sequence similarity 46, member B	FAM46B	-1.75615
inositol 1,4,5-trisphosphate 3-kinase B	ITPKB	-1.7558
poliovirus receptor-related 4	PVRL4	-1.75506
EPH receptor A7	EPHA7	-1.75397
dapper, antagonist of beta-catenin, homolog 1 (Xenopus laevis)	DACT1	-1.75312
Activating transcription factor 6	ATF6	-1.75249
leucine rich repeat transmembrane neuronal 2	LRRTM2	-1.75237
chromosome 1 open reading frame 43	C1orf43	-1.75233
RAB3A interacting protein (rabin3)	RAB3IP	-1.75115
leucine-rich repeat-containing G protein-coupled receptor 6	LGR6	-1.74948
monooxygenase, DBH-like 1	MOXD1	-1.74855
transmembrane protein 9	TMEM9	-1.74787
TIMP metallopeptidase inhibitor 2	TIMP2	-1.74735
KIAA0999 protein	KIAA0999	-1.7473
ADAM metallopeptidase with thrombospondin type 1 motif, 8	ADAMTS8	-1.74708
major histocompatibility complex, class II, DQ alpha 1	HLA-DQA1	-1.74703
hypothetical protein LOC100131177	LOC100131177	-1.74599
cystatin S	CST4	-1.7455
aldehyde dehydrogenase 8 family, member A1	ALDH8A1	-1.74543
ripply2 homolog (zebrafish) /// chromosome 6 open reading frame 159	C6orf159 /// RIPPLY2	-1.7452
chromosome 1 open reading frame 53	C1orf53	-1.74502
Hypothetical protein LOC100131067	LOC100131067	-1.74424
pleckstrin homology-like domain, family A, member 1	PHLDA1	-1.74417
casein kinase 1, alpha 1	CSNK1A1	-1.74358
dystonin	DST	-1.74258
paternally expressed 3 /// zinc finger, imprinted 2	PEG3 /// ZIM2	-1.74245
aldehyde dehydrogenase 2 family (mitochondrial)	ALDH2	-1.74231
forkhead box P2	FOXP2	-1.74163
corin, serine peptidase	CORIN	-1.74156
lymphoid enhancer-binding factor 1	LEF1	-1.74154
Cdk5 and Abl enzyme substrate 1	CABLES1	-1.74128
chimerin (chimaerin) 2	CHN2	-1.74073
septin 3	SEPT3	-1.73944
KIAA0485 protein	KIAA0485	-1.73869
ropporin, rhophilin associated protein 1 /// ropporin, rhophilin associated protein 1B	ROPN1 /// ROPN1B	-1.73731
complement component 3	C3	-1.73644
multiple PDZ domain protein	MPDZ	-1.73612
DMRT-like family A2	DMRTA2	-1.73372
fibroblast growth factor receptor 1 (fms-related tyrosine kinase 2, Pfeiffer syndrome)	FGFR1	-1.73369
synuclein, alpha interacting protein (synphilin)	SNCAIP	-1.73203
Zinc finger, DHHC-type containing 2	ZDHHC2	-1.73141
sterile alpha motif and leucine zipper containing kinase AZK	ZAK	-1.73121
KIN, antigenic determinant of recA protein homolog (mouse)	KIN	-1.7308
B-cell CLL/lymphoma 11A (zinc finger protein)	BCL11A	-1.72988
cadherin 5, type 2, VE-cadherin (vascular epithelium)	CDH5	-1.72964
secretoglobin, family 2A, member 1	SCGB2A1	-1.72948
cyclin-dependent kinase 5, regulatory subunit 1 (p35)	CDK5R1	-1.72797
S100 calcium binding protein A9	S100A9	-1.72761
G protein-coupled receptor 155	GPR155	-1.72721
myosin X	MYO10	-1.7271
homeobox B3	HOXB3	-1.72658
T cell receptor alpha locus /// T cell receptor delta locus	TRA@ /// TRD@	-1.72633
complement factor B	CFB	-1.7258
chemokine (C-X3-C motif) ligand 1	CX3CL1	-1.72543
actin, alpha 2, smooth muscle, aorta	ACTA2	-1.7251
dual specificity phosphatase 10	DUSP10	-1.72416
DEAD (Asp-Glu-Ala-Asp) box polypeptide 17	DDX17	-1.72319
carcinoembryonic antigen-related cell adhesion molecule 1 (biliary glycoprotein)	CEACAM1	-1.7229
acyl-CoA synthetase short-chain family member 3	ACSS3	-1.72227
leucine zipper transcription factor-like 1	LZTFL1	-1.72195
chromosome 6 open reading frame 170	C6orf170	-1.72129
doublecortin-like kinase 1	DCLK1	-1.72127
enabled homolog (Drosophila)	ENAH	-1.71834
odd-skipped related 1 (Drosophila)	OSR1	-1.71814
sarcoglycan, delta (35kDa dystrophin-associated glycoprotein)	SGCD	-1.71738
tigger transposable element derived 2	TIGD2	-1.71593
ras homolog gene family, member U	RHOU	-1.71587
doublecortin-like kinase 1	DCLK1	-1.71534
nanos homolog 1 (Drosophila)	NANOS1	-1.71426
ras homolog gene family, member B	RHOB	-1.71194
similar to hCG26659	LOC100130100	-1.71168
calcium channel, voltage-dependent, T type, alpha 1I subunit	CACNA1I	-1.71163
SH3 domain binding glutamic acid-rich protein	SH3BGR	-1.71147
phospholipase C, beta 4	PLCB4	-1.71121
phospholipase C, beta 4	PLCB4	-1.71036
APAF1 interacting protein	APIP	-1.71027
neuron navigator 1	NAV1	-1.71019
heparan sulfate 6-O-sulfotransferase 1	HS6ST1	-1.70946
bone morphogenetic protein receptor, type IB	BMPR1B	-1.70927
hypothetical LOC729839	LOC729839	-1.70846
neuropeptide Y receptor Y1	NPY1R	-1.70774
l(3)mbt-like (Drosophila)	L3MBTL	-1.70738
neurotrophic tyrosine kinase, receptor, type 2	NTRK2	-1.7069
Nuclear casein kinase and cyclin-dependent kinase substrate 1	NUCKS1	-1.70634
sema domain, transmembrane domain (TM), and cytoplasmic domain, (semaphorin) 6A	SEMA6A	-1.70554
cytochrome b5 type A (microsomal)	CYB5A	-1.70531
Ras-like without CAAX 1	RIT1	-1.70501
A kinase (PRKA) anchor protein 1	AKAP1	-1.7049
Wolfram syndrome 1 (wolframin)	WFS1	-1.70464
torsin family 3, member A	TOR3A	-1.70441
Zinc finger, DHHC-type containing 13	ZDHHC13	-1.70384
nuclear factor I/B	NFIB	-1.70336
immediate early response 5-like	IER5L	-1.70323
RNA binding motif, single stranded interacting protein	RBMS3	-1.70185
lysophospholipase-like 1	LYPLAL1	-1.70112
synaptopodin 2	SYNPO2	-1.69959
myelin expression factor 2	MYEF2	-1.69917
fibroblast growth factor receptor 1 (fms-related tyrosine kinase 2, Pfeiffer syndrome)	FGFR1	-1.69904
tripartite motif-containing 16-like	TRIM16L	-1.69855
runt-related transcription factor 2	RUNX2	-1.6983
cAMP responsive element binding protein 5	CREB5	-1.69708
tripartite motif-containing 31	TRIM31	-1.69698
Homo sapiens, clone IMAGE:4698842, mRNA /// ATPase, class I, type 8B, member 1	ATP8B1	-1.69629
Meis homeobox 3 pseudogene 1	MEIS3P1	-1.69591
tripartite motif-containing 11	TRIM11	-1.6959
toll-like receptor 4	TLR4	-1.6956
acid phosphatase-like 2	ACPL2	-1.69555
phosphatase, orphan 2	PHOSPHO2	-1.6954
biglycan	BGN	-1.6944
sterile alpha motif and leucine zipper containing kinase AZK	ZAK	-1.69421
chromosome 14 open reading frame 50	C14orf50	-1.69412
kynurenine 3-monooxygenase (kynurenine 3-hydroxylase)	KMO	-1.69409
glutathione S-transferase M4	GSTM4	-1.69389
abhydrolase domain containing 12B	ABHD12B	-1.69362
synuclein, alpha interacting protein (synphilin)	SNCAIP	-1.69328
hypothetical protein KIAA1833	KIAA1833	-1.6929
sulfotransferase family 4A, member 1	SULT4A1	-1.6928
butyrophilin, subfamily 3, member A2	BTN3A2	-1.69096
solute carrier family 4, anion exchanger, member 3	SLC4A3	-1.69063
hepatic leukemia factor	HLF	-1.69017
quiescin Q6 sulfhydryl oxidase 1	QSOX1	-1.68999
glycine-N-acyltransferase-like 1	GLYATL1	-1.68972
F-box protein 28	FBXO28	-1.68961
GULP, engulfment adaptor PTB domain containing 1	GULP1	-1.68752
chromosome 1 open reading frame 57	C1orf57	-1.68624
WAP four-disulfide core domain 8	WFDC8	-1.68596
immunoglobulin lambda locus	IGL@	-1.68578
TRAF2 and NCK interacting kinase	TNIK	-1.68305
chromosome 6 open reading frame 52	C6orf52	-1.68266
septin 9	SEPT9	-1.68225
PH domain and leucine rich repeat protein phosphatase	PHLPP	-1.68174
contactin 4	CNTN4	-1.68135
basigin (Ok blood group)	BSG	-1.6807
protocadherin alpha 9 /// protocadherin alpha subfamily C, 2 /// protocadherin alpha subfamily C, 1 /// protocadherin alpha 13 /// protocadherin alpha 12 /// protocadherin alpha 11 /// protocadherin alpha 10 /// protocadherin alpha 8 /// protocadherin alpha 7 /// protocadherin alpha 6 /// protocadherin alpha 5 /// protocadherin alpha 4 /// protocadherin alpha 3 /// protocadherin alpha 2 /// proto…	PCDHA1 /// PCDHA10 /// PCDHA11 /// PCDHA12 /// PCDHA13 /// PCDHA2 /// PCDHA3 /// PCDHA4 /// PCDHA5 /// PCDHA6 /// PCDHA7 /// PCDHA8 /// PCDHA9 /// PCDHAC1 /// PCDHAC2	-1.67999
hypothetical protein FLJ22184	FLJ22184	-1.67999
OTU domain, ubiquitin aldehyde binding 2	OTUB2	-1.6798
nuclear casein kinase and cyclin-dependent kinase substrate 1	NUCKS1	-1.67975
ectodermal-neural cortex (with BTB-like domain)	ENC1	-1.67941
chromosome 5 open reading frame 23	C5orf23	-1.67868
TAR (HIV-1) RNA binding protein 1	TARBP1	-1.67818
doublecortex; lissencephaly, X-linked (doublecortin)	DCX	-1.67771
protocadherin alpha 9 /// protocadherin alpha subfamily C, 2 /// protocadherin alpha subfamily C, 1 /// protocadherin alpha 13 /// protocadherin alpha 12 /// protocadherin alpha 11 /// protocadherin alpha 10 /// protocadherin alpha 8 /// protocadherin alpha 7 /// protocadherin alpha 6 /// protocadherin alpha 5 /// protocadherin alpha 4 /// protocadherin alpha 3 /// protocadherin alpha 2 /// proto…	PCDHA1 /// PCDHA10 /// PCDHA11 /// PCDHA12 /// PCDHA13 /// PCDHA2 /// PCDHA3 /// PCDHA4 /// PCDHA5 /// PCDHA6 /// PCDHA7 /// PCDHA8 /// PCDHA9 /// PCDHAC1 /// PCDHAC2	-1.6773
parathyroid hormone-like hormone	PTHLH	-1.67676
major histocompatibility complex, class II, DQ alpha 1	HLA-DQA1	-1.67578
aspartylglucosaminidase	AGA	-1.67519
prostaglandin E receptor 3 (subtype EP3)	PTGER3	-1.67511
thymosin-like 8 /// thymosin beta15b	MGC39900 /// TMSL8	-1.67377
hypothetical gene supported by BC017958	LOC347475	-1.67333
postmeiotic segregation increased 2-like 2	PMS2L2	-1.67307
CD44 molecule (Indian blood group)	CD44	-1.67213
guanine nucleotide binding protein (G protein), beta 5	GNB5	-1.67136
solute carrier family 16, member 14 (monocarboxylic acid transporter 14)	SLC16A14	-1.67115
NADH dehydrogenase (ubiquinone) Fe-S protein 2, 49kDa (NADH-coenzyme Q reductase)	NDUFS2	-1.67107
c-fos induced growth factor (vascular endothelial growth factor D)	FIGF	-1.67086
aspartylglucosaminidase	AGA	-1.67064
RAS-like, family 11, member B	RASL11B	-1.67052
acyl-CoA synthetase long-chain family member 5	ACSL5	-1.67012
Boc homolog (mouse)	BOC	-1.66975
histone cluster 1, H4i /// histone cluster 1, H4a /// histone cluster 1, H4d /// histone cluster 1, H4f /// histone cluster 1, H4k /// histone cluster 1, H4j /// histone cluster 1, H4c /// histone cluster 1, H4h /// histone cluster 1, H4b /// histone cluster 1, H4e /// histone cluster 1, H4l /// histone cluster 2, H4a /// histone cluster 4, H4 /// histone cluster 2, H4b	HIST1H4A /// HIST1H4B /// HIST1H4C /// HIST1H4D /// HIST1H4E /// HIST1H4F /// HIST1H4H /// HIST1H4I /// HIST1H4J /// HIST1H4K /// HIST1H4L /// HIST2H4A /// HIST2H4B /// HIST4H4	-1.66965
GINS complex subunit 4 (Sld5 homolog)	GINS4	-1.66848
histone cluster 1, H1c	HIST1H1C	-1.66828
interferon regulatory factor 6	IRF6	-1.66822
fibroblast growth factor 14	FGF14	-1.66766
KIAA0888 protein	KIAA0888	-1.66755
carbohydrate (chondroitin 4) sulfotransferase 11	CHST11	-1.66753
Golgi-localized protein	GOLSYN	-1.66721
pitrilysin metallopeptidase 1	PITRM1	-1.66714
phosphodiesterase 11A	PDE11A	-1.66696
monooxygenase, DBH-like 1	MOXD1	-1.66689
transcobalamin II; macrocytic anemia	TCN2	-1.66594
metallothionein 1H	MT1H	-1.66499
mitochondrial ribosomal protein L43	MRPL43	-1.66491
adrenergic, beta, receptor kinase 2	ADRBK2	-1.66436
transmembrane protein 20	TMEM20	-1.664
hypothetical protein LOC728264	LOC728264	-1.66397
autocrine motility factor receptor	AMFR	-1.66322
Eukaryotic translation initiation factor 2C, 4	EIF2C4	-1.6632
Ras protein-specific guanine nucleotide-releasing factor 1	RASGRF1	-1.6631
tumor suppressor candidate 3	TUSC3	-1.663
NEL-like 2 (chicken)	NELL2	-1.66234
Fanconi anemia, complementation group C	FANCC	-1.66228
pleckstrin homology domain containing, family A member 5	PLEKHA5	-1.66186
prenyl (decaprenyl) diphosphate synthase, subunit 1	PDSS1	-1.66091
carcinoembryonic antigen-related cell adhesion molecule 6 (non-specific cross reacting antigen)	CEACAM6	-1.66004
T cell receptor beta constant 1	TRBC1	-1.65981
transient receptor potential cation channel, subfamily M, member 4	TRPM4	-1.65952
potassium large conductance calcium-activated channel, subfamily M, beta member 1	KCNMB1	-1.65927
F-box protein 28	FBXO28	-1.65794
F-box protein 6	FBXO6	-1.65748
thyroid adenoma associated	THADA	-1.65681
DnaJ (Hsp40) homolog, subfamily A, member 4	DNAJA4	-1.65659
purinergic receptor P2Y, G-protein coupled, 2	P2RY2	-1.65642
prion protein 2 (dublet)	PRND	-1.6557
carboxylesterase 1 (monocyte/macrophage serine esterase 1)	CES1	-1.65526
cytochrome b5 type A (microsomal)	CYB5A	-1.65511
major histocompatibility complex, class I-related	MR1	-1.65445
calmodulin-like 4	CALML4	-1.65372
multiple PDZ domain protein	MPDZ	-1.65364
phosphoinositide-3-kinase, class 2, gamma polypeptide	PIK3C2G	-1.65337
Hypothetical protein LOC100130097	LOC100130097	-1.65328
histone cluster 2, H2aa3 /// histone cluster 2, H2aa4	HIST2H2AA3 /// HIST2H2AA4	-1.65295
microtubule associated serine/threonine kinase family member 4 /// hypothetical protein LOC100128443	LOC100128443 /// MAST4	-1.65286
pre-B-cell leukemia homeobox 1	PBX1	-1.65191
CNKSR family member 3	CNKSR3	-1.6514
metallothionein 1F	MT1F	-1.65093
beta-1,3-N-acetylgalactosaminyltransferase 2	B3GALNT2	-1.65034
nuclear factor I/B	NFIB	-1.65011
selenoprotein M	SELM	-1.64921
KCNQ1 overlapping transcript 1 (non-protein coding)	KCNQ1OT1	-1.64889
prematurely terminated mRNA decay factor-like	LOC91431	-1.64836
exocyst complex component 2	EXOC2	-1.6483
origin recognition complex, subunit 6 like (yeast)	ORC6L	-1.64823
homeobox B6	HOXB6	-1.64718
spleen tyrosine kinase	SYK	-1.64713
telomerase-associated protein 1	TEP1	-1.64712
neuronal PAS domain protein 2	NPAS2	-1.64709
G protein-coupled receptor 34	GPR34	-1.64701
protein tyrosine phosphatase, non-receptor type 22 (lymphoid)	PTPN22	-1.64669
protein kinase, X-linked, pseudogene 1	PRKXP1	-1.64643
programmed cell death 4 (neoplastic transformation inhibitor)	PDCD4	-1.6452
elastin (supravalvular aortic stenosis, Williams-Beuren syndrome)	ELN	-1.64408
family with sequence similarity 111, member B	FAM111B	-1.64357
ermin, ERM-like protein	ERMN	-1.6435
procollagen C-endopeptidase enhancer	PCOLCE	-1.64329
chromosome 11 open reading frame 75	C11orf75	-1.64253
transforming growth factor, beta 2	TGFB2	-1.64234
RAS-like, family 12	RASL12	-1.64189
oxysterol binding protein-like 6	OSBPL6	-1.64175
solute carrier family 15 (oligopeptide transporter), member 1	SLC15A1	-1.64115
Chromosome 9 open reading frame 45	STRBP	-1.63874
immunoglobulin kappa constant /// immunoglobulin kappa variable 1-5 /// immunoglobulin kappa locus /// similar to Ig kappa chain V-I region HK101 precursor /// similar to Ig kappa chain V-I region HK102 precursor	IGK@ /// IGKC /// IGKV1-5 /// LOC647506 /// LOC652694	-1.63834
major histocompatibility complex, class II, DQ beta 1 /// major histocompatibility complex, class II, DQ beta 2 /// major histocompatibility complex, class II, DR beta 1 /// major histocompatibility complex, class II, DR beta 2 (pseudogene) /// major histocompatibility complex, class II, DR beta 3 /// major histocompatibility complex, class II, DR beta 4 /// major histocompatibility complex, clas…	hCG_1998957 /// HLA-DQB1 /// HLA-DQB2 /// HLA-DRB1 /// HLA-DRB2 /// HLA-DRB3 /// HLA-DRB4 /// HLA-DRB5 /// LOC100133484 /// LOC100133583 /// LOC100133661 /// LOC100133811 /// LOC730415 /// RNASE2 /// ZNF749	-1.63825
plasma glutamate carboxypeptidase	PGCP	-1.63783
alpha-methylacyl-CoA racemase /// C1q and tumor necrosis factor related protein 3	AMACR /// C1QTNF3	-1.63753
small nuclear ribonucleoprotein polypeptide N /// SNRPN upstream reading frame	SNRPN /// SNURF	-1.6362
TIP41, TOR signaling pathway regulator-like (S. cerevisiae)	TIPRL	-1.63604
homeobox D10	HOXD10	-1.63596
carbohydrate (N-acetylgalactosamine 4-0) sulfotransferase 9	CHST9	-1.63531
family with sequence similarity 110, member C	FAM110C	-1.63455
family with sequence similarity 107, member A	FAM107A	-1.63383
glucosaminyl (N-acetyl) transferase 1, core 2 (beta-1,6-N-acetylglucosaminyltransferase)	GCNT1	-1.63376
phosphatidylinositol transfer protein, cytoplasmic 1	PITPNC1	-1.63374
SERTA domain containing 4	SERTAD4	-1.6334
kelch-like 18 (Drosophila)	KLHL18	-1.63319
endosulfine alpha	ENSA	-1.63292
piccolo (presynaptic cytomatrix protein)	PCLO	-1.63284
nuclear factor I/B	NFIB	-1.63218
SRY (sex determining region Y)-box 4	SOX4	-1.63214
Chromosome 15 open reading frame 29	C15orf29	-1.63187
zinc finger and BTB domain containing 10	ZBTB10	-1.63183
hexosaminidase B (beta polypeptide)	HEXB	-1.63147
hypothetical protein FLJ11996	FLJ11996	-1.63097
solute carrier family 40 (iron-regulated transporter), member 1	SLC40A1	-1.63068
Nance-Horan syndrome (congenital cataracts and dental anomalies)	NHS	-1.63061
estrogen receptor binding site associated, antigen, 9	EBAG9	-1.63043
solute carrier family 24 (sodium/potassium/calcium exchanger), member 3	SLC24A3	-1.63017
Hypothetical protein MGC11082	MGC11082	-1.63015
autism susceptibility candidate 2	AUTS2	-1.62962
SMAD family member 9	SMAD9	-1.62919
cytochrome P450, family 39, subfamily A, polypeptide 1	CYP39A1	-1.62888
serpin peptidase inhibitor, clade A (alpha-1 antiproteinase, antitrypsin), member 1	SERPINA1	-1.62832
phospholipase D family, member 5	PLD5	-1.6282
nuclear receptor subfamily 5, group A, member 2	NR5A2	-1.62804
claudin 3	CLDN3	-1.62756
seizure related 6 homolog (mouse)-like	SEZ6L	-1.6274
Hydroxysteroid dehydrogenase like 2	HSDL2	-1.62725
zinc finger protein 516	ZNF516	-1.62701
transmembrane protein 200B	TMEM200B	-1.62677
dimethylarginine dimethylaminohydrolase 2	DDAH2	-1.62666
transgelin	TAGLN	-1.62592
fibroblast growth factor 19	FGF19	-1.62583
estrogen receptor binding site associated, antigen, 9	EBAG9	-1.62576
chromosome 20 open reading frame 19	C20orf19	-1.62526
programmed cell death 4 (neoplastic transformation inhibitor)	PDCD4	-1.62482
WD repeat domain 86	WDR86	-1.62361
ring finger protein, transmembrane 1	RNFT1	-1.62259
MLF1 interacting protein	MLF1IP	-1.62245
immunoglobulin lambda joining 3	IGLJ3	-1.62113
secreted frizzled-related protein 4	SFRP4	-1.62058
phosphorylase kinase, beta	PHKB	-1.62006
tumor suppressor candidate 3	TUSC3	-1.61906
chromosome 8 open reading frame 59	C8orf59	-1.61904
napsin B aspartic peptidase pseudogene	NAPSB	-1.61867
Hypothetical LOC730200	LOC730200	-1.61805
chromosome 20 open reading frame 19	C20orf19	-1.61765
Armadillo repeat containing, X-linked 4	ARMCX4	-1.61739
N-acylsphingosine amidohydrolase (acid ceramidase) 1	ASAH1	-1.61674
endosulfine alpha	ENSA	-1.61672
fibroblast growth factor receptor 1 (fms-related tyrosine kinase 2, Pfeiffer syndrome)	FGFR1	-1.61668
PDZ and LIM domain 5	PDLIM5	-1.61657
aconitase 2, mitochondrial	ACO2	-1.61653
metallothionein 3	MT3	-1.61651
kelch-like 29 (Drosophila)	KLHL29	-1.61643
small nuclear ribonucleoprotein polypeptide N	SNRPN	-1.61484
hypothetical gene supported by AK125122	FLJ13137	-1.61474
cathepsin B	CTSB	-1.61412
metallothionein 1F	MT1F	-1.61349
centrosomal protein 152kDa	CEP152	-1.61335
lymphocyte antigen 6 complex, locus G6D	LY6G6D	-1.61313
calpain 6	CAPN6	-1.61299
flavin containing monooxygenase 2 (non-functional)	FMO2	-1.61288
KIAA0040	KIAA0040	-1.61243
mitochondrial ribosomal protein S14	MRPS14	-1.61234
DKFZP564O0823 protein	DKFZP564O0823	-1.61233
zinc finger protein 85	ZNF85	-1.61205
Hypothetical LOC283666	LOC283666	-1.61195
neuron navigator 1	NAV1	-1.61174
Tenascin C (hexabrachion)	TNC	-1.61155
UDP-N-acetyl-alpha-D-galactosamine:polypeptide N-acetylgalactosaminyltransferase 10 (GalNAc-T10)	GALNT10	-1.61145
glutathione S-transferase A4	GSTA4	-1.61127
methionine sulfoxide reductase B2	MSRB2	-1.61111
vang-like 2 (van gogh, Drosophila)	VANGL2	-1.61007
butyrophilin, subfamily 3, member A2	BTN3A2	-1.60965
hypothetical protein LOC728264	LOC728264	-1.60958
LIM and senescent cell antigen-like domains 1	LIMS1	-1.60948
Rap guanine nucleotide exchange factor (GEF) 2	RAPGEF2	-1.60939
IQ motif containing K	IQCK	-1.60928
integrator complex subunit 10	INTS10	-1.6089
major histocompatibility complex, class II, DQ beta 1	HLA-DQB1	-1.6087
programmed cell death 4 (neoplastic transformation inhibitor)	PDCD4	-1.60813
arginine and glutamate rich 1	ARGLU1	-1.60769
solute carrier family 1 (glial high affinity glutamate transporter), member 2	SLC1A2	-1.60742
presenilin 2 (Alzheimer disease 4)	PSEN2	-1.60697
carcinoembryonic antigen-related cell adhesion molecule 7	CEACAM7	-1.60688
phosphodiesterase 7A	PDE7A	-1.60651
iroquois homeobox 5	IRX5	-1.60589
dipeptidyl-peptidase 6	DPP6	-1.60581
serine/threonine protein kinase MST4	RP6-213H19.1	-1.60578
cytochrome b5 type A (microsomal)	CYB5A	-1.60569
protein kinase C and casein kinase substrate in neurons 1	PACSIN1	-1.6056
Usher syndrome 2A (autosomal recessive, mild)	USH2A	-1.6053
creatine kinase, mitochondrial 1B /// creatine kinase, mitochondrial 1A /// similar to Creatine kinase, ubiquitous mitochondrial precursor (U-MtCK) (Mia-CK) (Acidic-type mitochondrial creatine kinase)	CKMT1A /// CKMT1B /// LOC100133623	-1.60514
abhydrolase domain containing 5	ABHD5	-1.60457
suppressor of cytokine signaling 6	SOCS6	-1.604
myocardin	MYOCD	-1.604
solute carrier family 38, member 9	SLC38A9	-1.60375
zinc finger protein 503	ZNF503	-1.60313
UDP-N-acetyl-alpha-D-galactosamine:polypeptide N-acetylgalactosaminyltransferase 10 (GalNAc-T10)	GALNT10	-1.60307
KIAA0506 protein	KIAA0506	-1.60252
neuron navigator 1	NAV1	-1.60252
CUE domain containing 1	CUEDC1	-1.60233
OTU domain, ubiquitin aldehyde binding 2	OTUB2	-1.60208
myotubularin related protein 4	MTMR4	-1.60184
histone cluster 2, H2aa3 /// histone cluster 2, H2aa4	HIST2H2AA3 /// HIST2H2AA4	-1.60184
teashirt zinc finger homeobox 2	TSHZ2	-1.60154
AF4/FMR2 family, member 3	AFF3	-1.60153
F-box protein 16	FBXO16	-1.60127
metallothionein 2A	MT2A	-1.60114
glucosidase, beta; acid (includes glucosylceramidase) /// glucosidase, beta; acid, pseudogene	GBA /// GBAP	-1.60055
calmodulin regulated spectrin-associated protein 1	CAMSAP1	-1.60053
TBC1 (tre-2/USP6, BUB2, cdc16) domain family, member 1	TBC1D1	-1.59877
filamin A interacting protein 1	FILIP1	-1.5987
5-oxoprolinase (ATP-hydrolysing)	OPLAH	-1.59832
enabled homolog (Drosophila)	ENAH	-1.59831
ATPase, Ca++ transporting, plasma membrane 4	ATP2B4	-1.59823
immunoglobulin kappa constant /// immunoglobulin kappa variable 1-5 /// similar to Ig kappa chain V-I region HK101 precursor /// similar to Ig kappa chain V-I region HK102 precursor /// similar to hCG26659	IGKC /// IGKV1-5 /// LOC100130100 /// LOC647506 /// LOC650405 /// LOC652493 /// LOC652694	-1.59793
kelch-like 13 (Drosophila)	KLHL13	-1.59711
ATPase, H+ transporting, lysosomal 50/57kDa, V1 subunit H	ATP6V1H	-1.59711
hairy/enhancer-of-split related with YRPW motif-like	HEYL	-1.5968
biglycan	BGN	-1.59679
fidgetin-like 1	FIGNL1	-1.59671
MORC family CW-type zinc finger 4	MORC4	-1.59654
Tensin 1	TNS1	-1.59645
desmin	DES	-1.59621
transgelin	TAGLN	-1.59607
general transcription factor IIIC, polypeptide 5, 63kDa	GTF3C5	-1.59526
feline leukemia virus subgroup C cellular receptor 1	FLVCR1	-1.5952
KIAA0101	KIAA0101	-1.59499
hypothetical LOC100130502	LOC100130502	-1.59482
TRAF2 and NCK interacting kinase	TNIK	-1.5947
secretory leukocyte peptidase inhibitor	SLPI	-1.59452
family with sequence similarity 130, member A2	FAM130A2	-1.59412
KIAA1324	KIAA1324	-1.59389
ubiquitin specific peptidase 6 (Tre-2 oncogene)	USP6	-1.59383
ATPase, Ca++ transporting, plasma membrane 4	ATP2B4	-1.59369
Golgi autoantigen, golgin subfamily a, 1	GOLGA1	-1.59364
cell division cycle 20 homolog B (S. cerevisiae)	CDC20B	-1.59293
sterile alpha motif and leucine zipper containing kinase AZK	ZAK	-1.5925
FLJ42957 protein	FLJ42957	-1.5925
protein kinase, X-linked /// protein kinase, Y-linked	PRKX /// PRKY	-1.59242
calcium binding protein 39-like	CAB39L	-1.59175
dimethylarginine dimethylaminohydrolase 2	DDAH2	-1.59169
N-acyl phosphatidylethanolamine phospholipase D	NAPEPLD	-1.59165
Similar to programmed cell death 6 interacting protein	LOC731884	-1.59163
prostate collagen triple helix /// hypothetical protein LOC100133696	LOC100133696 /// PCOTH	-1.59122
zinc finger protein 621	ZNF621	-1.59025
SIX homeobox 1	SIX1	-1.59015
ligand of numb-protein X 1	LNX1	-1.58862
protein phosphatase 1, regulatory (inhibitor) subunit 12B	PPP1R12B	-1.588
hypothetical protein LOC284702	LOC284702	-1.58766
major histocompatibility complex, class I, A	HLA-A	-1.58725
Hypothetical protein LOC645030	LOC645030	-1.58716
B-box and SPRY domain containing	BSPRY	-1.58706
frizzled homolog 10 (Drosophila)	FZD10	-1.58704
mesoderm posterior 1 homolog (mouse)	MESP1	-1.58624
benzodiazapine receptor (peripheral) associated protein 1	BZRAP1	-1.58621
Centrosomal protein 152kDa	CEP152	-1.58429
Teashirt zinc finger homeobox 2	TSHZ2	-1.5839
transmembrane anterior posterior transformation 1	TAPT1	-1.58385
myocardial infarction associated transcript (non-protein coding)	MIAT	-1.58372
Hypothetical protein LOC100129502	LOC100129502	-1.58367
calmodulin-like 4	CALML4	-1.58335
HBS1-like (S. cerevisiae)	HBS1L	-1.58309
chromosome 14 open reading frame 101	C14orf101	-1.58217
Transportin 1	TNPO1	-1.582
Negative regulator of ubiquitin-like proteins 1	NUB1	-1.58177
BUB1 budding uninhibited by benzimidazoles 1 homolog (yeast)	BUB1	-1.58164
Fanconi anemia, complementation group A	FANCA	-1.58161
Roundabout, axon guidance receptor, homolog 2 (Drosophila)	ROBO2	-1.58094
hypothetical gene supported by AK126569	FLJ44606	-1.57991
lysophospholipase-like 1	LYPLAL1	-1.57968
immediate early response 5-like	IER5L	-1.57929
solute carrier family 46, member 3	SLC46A3	-1.57922
osteomodulin	OMD	-1.57818
major histocompatibility complex, class I-related	MR1	-1.57807
zinc finger protein 626	ZNF626	-1.57789
KIAA0040	KIAA0040	-1.57782
vitrin	VIT	-1.57773
MLF1 interacting protein	MLF1IP	-1.57729
hydroxysteroid (17-beta) dehydrogenase 6 homolog (mouse)	HSD17B6	-1.57693
polymerase (RNA) III (DNA directed) polypeptide E (80kD)	POLR3E	-1.57677
BCL2-like 11 (apoptosis facilitator)	BCL2L11	-1.57646
G protein-coupled receptor 161	GPR161	-1.57641
tetraspanin 2	TSPAN2	-1.57637
neuron navigator 1	NAV1	-1.57623
v-myb myeloblastosis viral oncogene homolog (avian)-like 1	MYBL1	-1.57613
histone cluster 1, H2bg	HIST1H2BG	-1.57581
dynein, axonemal, heavy chain 5	DNAH5	-1.57539
syntaxin 6	STX6	-1.57525
homeobox B7	HOXB7	-1.57467
sorbin and SH3 domain containing 2	SORBS2	-1.57456
hypothetical LOC731484	LOC731484	-1.57428
serpin peptidase inhibitor, clade B (ovalbumin), member 4	SERPINB4	-1.57411
chromosome 9 open reading frame 84	C9orf84	-1.57295
secreted and transmembrane 1	SECTM1	-1.57295
myosin IB	MYO1B	-1.57261
ubiquinol-cytochrome c reductase hinge protein	UQCRH	-1.5712
solute carrier family 6 (amino acid transporter), member 14	SLC6A14	-1.57119
signal peptide, CUB domain, EGF-like 3	SCUBE3	-1.57111
doublesex and mab-3 related transcription factor 3	DMRT3	-1.57043
aspartate beta-hydroxylase domain containing 2	ASPHD2	-1.57039
glutamyl-prolyl-tRNA synthetase	EPRS	-1.56999
KIAA1147	KIAA1147	-1.5697
ring finger protein 180	RNF180	-1.56936
lectin, galactoside-binding, soluble, 8 (galectin 8)	LGALS8	-1.56925
WD repeat domain 5B	WDR5B	-1.56897
prostaglandin E receptor 4 (subtype EP4)	PTGER4	-1.56888
CDNA FLJ36181 fis, clone TESTI2026794 /// Ring finger protein 157	RNF157	-1.56844
placenta-specific 8	PLAC8	-1.56838
hypothetical LOC100113407	RP11-679B17.1	-1.56833
adenosine deaminase, RNA-specific	ADAR	-1.56826
neuronal PAS domain protein 3	NPAS3	-1.56789
RAB3A interacting protein (rabin3)	RAB3IP	-1.56772
syntrophin, beta 1 (dystrophin-associated protein A1, 59kDa, basic component 1)	SNTB1	-1.56737
tumor suppressor candidate 3	TUSC3	-1.56724
interferon regulatory factor 6	IRF6	-1.56715
KIAA0802	KIAA0802	-1.5671
denticleless homolog (Drosophila)	DTL	-1.56709
transforming, acidic coiled-coil containing protein 1	TACC1	-1.56655
prostaglandin D2 synthase, hematopoietic	PGDS	-1.56654
ras homolog gene family, member U	RHOU	-1.56633
SCY1-like 1 binding protein 1	SCYL1BP1	-1.5661
zinc finger protein 43	ZNF43	-1.56552
disrupted in schizophrenia 1	DISC1	-1.56507
tetratricopeptide repeat domain 6	TTC6	-1.56504
hypothetical protein LOC155006	LOC155006	-1.56454
microtubule-associated protein 1B	MAP1B	-1.56449
tumor necrosis factor receptor superfamily, member 17	TNFRSF17	-1.56436
membrane-spanning 4-domains, subfamily A, member 6A	MS4A6A	-1.56394
PI-3-kinase-related kinase SMG-1 pseudogene	LOC595101	-1.56353
RAS protein activator like 2	RASAL2	-1.56321
chromosome 10 open reading frame 99	C10orf99	-1.56291
trichorhinophalangeal syndrome I	TRPS1	-1.56243
growth arrest-specific 2 like 1	GAS2L1	-1.5622
keratin 6A /// keratin 6B /// keratin 6C	KRT6A /// KRT6B /// KRT6C	-1.56175
transmembrane protein 183A /// transmembrane protein 183B	TMEM183A /// TMEM183B	-1.56169
ATPase, Na+/K+ transporting, alpha 2 (+) polypeptide	ATP1A2	-1.56147
death effector domain containing	DEDD	-1.56142
dimethylarginine dimethylaminohydrolase 2	DDAH2	-1.56097
CCAAT/enhancer binding protein (C/EBP), delta	CEBPD	-1.56077
RNA binding motif protein 34	RBM34	-1.56035
adenosine deaminase-like	ADAL	-1.5602
polymerase (DNA-directed), epsilon 4 (p12 subunit)	POLE4	-1.56013
methyltransferase like 3	METTL3	-1.55937
fatty acid binding protein 6, ileal (gastrotropin)	FABP6	-1.55923
myosin X	MYO10	-1.55886
RAB11 family interacting protein 1 (class I)	RAB11FIP1	-1.55869
transforming, acidic coiled-coil containing protein 1	TACC1	-1.55836
protein kinase, X-linked	PRKX	-1.55807
integrator complex subunit 10	INTS10	-1.557
inositol 1,4,5-trisphosphate 3-kinase B	ITPKB	-1.55626
integrator complex subunit 7	INTS7	-1.55604
RAB25, member RAS oncogene family	RAB25	-1.55599
major histocompatibility complex, class II, DQ alpha 1 /// major histocompatibility complex, class II, DQ alpha 2	HLA-DQA1 /// HLA-DQA2	-1.55585
RPA interacting protein	RPAIN	-1.55555
carbonic anhydrase X	CA10	-1.55536
chemokine (C-X-C motif) ligand 17	CXCL17	-1.55531
Enah/Vasp-like	EVL	-1.55458
Cardiolipin synthase 1	CRLS1	-1.55388
latent transforming growth factor beta binding protein 1	LTBP1	-1.5537
transformer-2 alpha	TRA2A	-1.55342
hypothetical LOC442075	LOC442075	-1.55281
sorbin and SH3 domain containing 2	SORBS2	-1.55263
butyrophilin, subfamily 2, member A2	BTN2A2	-1.55261
solute carrier family 35, member E2 /// similar to solute carrier family 35, member E2	RP11-345P4.4 /// SLC35E2	-1.55256
transcription factor 7 (T-cell specific, HMG-box)	TCF7	-1.55244
single-minded homolog 2 (Drosophila)	SIM2	-1.55215
major histocompatibility complex, class I, B /// major histocompatibility complex, class I, C /// MHC class I polypeptide-related sequence A /// MHC class I polypeptide-related sequence B	HLA-B /// HLA-C /// MICA /// MICB /// XXbac-BPG181B23.1	-1.55207
suppressor of cytokine signaling 6	SOCS6	-1.55192
chromosome 10 open reading frame 58	C10orf58	-1.55159
enhancer of yellow 2 homolog (Drosophila)	ENY2	-1.55139
importin 9	IPO9	-1.55094
RAS protein activator like 2	RASAL2	-1.55059
taurine upregulated gene 1	TUG1	-1.55057
chromosome 17 open reading frame 93	C17orf93	-1.55035
nuclear receptor coactivator 4	NCOA4	-1.54947
KIAA0241	KIAA0241	-1.54939
hypothetical gene supported by BX647608	LOC399959	-1.54926
ribonuclease L (2',5'-oligoisoadenylate synthetase-dependent)	RNASEL	-1.54916
cornifelin	CNFN	-1.54915
potassium channel modulatory factor 1	KCMF1	-1.54867
pre-B-cell leukemia homeobox interacting protein 1	PBXIP1	-1.54862
guanine nucleotide binding protein (G protein), alpha inhibiting activity polypeptide 1	GNAI1	-1.54823
ectonucleotide pyrophosphatase/phosphodiesterase 2 (autotaxin)	ENPP2	-1.5476
hypothetical LOC387763	LOC387763	-1.54738
cytoplasmic FMR1 interacting protein 2	CYFIP2	-1.54705
sodium channel, voltage-gated, type II, alpha subunit	SCN2A	-1.54702
chromosome 8 open reading frame 44	C8orf44	-1.54651
phenylalanyl-tRNA synthetase, beta subunit	FARSB	-1.54638
secretoglobin, family 1D, member 2	SCGB1D2	-1.54615
beta-1,3-N-acetylgalactosaminyltransferase 2	B3GALNT2	-1.54581
cysteinyl leukotriene receptor 1	CYSLTR1	-1.5446
guanine nucleotide binding protein-like 3 (nucleolar)-like	GNL3L	-1.54406
Zinc finger protein 678	ZNF678	-1.54393
apolipoprotein O	APOO	-1.5437
RGM domain family, member A	RGMA	-1.5437
transmembrane protein 119	TMEM119	-1.54324
EF-hand calcium binding domain 3 /// similar to hypoxia-inducible protein 2	EFCAB3 /// LOC100133744	-1.54298
F-box protein 9	FBXO9	-1.54284
exostoses (multiple) 1	EXT1	-1.54271
TNF receptor-associated factor 5	TRAF5	-1.54192
metallothionein 1 pseudogene 2	MT1P2	-1.54171
ankyrin repeat and SOCS box-containing 2	ASB2	-1.54164
immunoglobulin heavy constant alpha 1 /// immunoglobulin heavy constant gamma 1 (G1m marker) /// immunoglobulin heavy variable group	IGHA1 /// IGHG1 /// IGHV@	-1.54156
chromosome 1 open reading frame 156	C1orf156	-1.54155
MAS-related GPR, member F	MRGPRF	-1.54127
Interferon-induced protein 44	IFI44	-1.54124
retinol binding protein 7, cellular	RBP7	-1.54115
transmembrane and coiled-coil domain family 1	TMCC1	-1.54098
transporter 1, ATP-binding cassette, sub-family B (MDR/TAP)	TAP1	-1.54085
olfactomedin-like 2A	OLFML2A	-1.5406
SH3-binding domain kinase 1	SBK1	-1.54034
protease, serine, 23	PRSS23	-1.54027
hCG1806964	hCG_1806964	-1.54025
Hypothetical protein LOC349160	LOC349160	-1.54015
hypothetical LOC731484	LOC731484	-1.53985
catenin (cadherin-associated protein), beta 1, 88kDa	CTNNB1	-1.53946
neuroblastoma breakpoint family, member 14 /// neuroblastoma breakpoint family, member 1 /// KIAA1245 /// neuroblastoma breakpoint family, member 11 /// neuroblastoma breakpoint family, member 15 /// neuroblastoma breakpoint family, member 20 /// neuroblastoma breakpoint family, member 9 /// neuroblastoma breakpoint family, member 10 /// neuroblastoma breakpoint family, member 8 /// CG10522-PA-li…	KIAA1245 /// LOC100132406 /// NBPF1 /// NBPF10 /// NBPF11 /// NBPF14 /// NBPF15 /// NBPF16 /// NBPF20 /// NBPF8 /// NBPF9 /// RP3-377D14.1 /// XXyac-YX155B6.1	-1.53907
dual specificity phosphatase 23	DUSP23	-1.53869
kelch-like 29 (Drosophila)	KLHL29	-1.5386
insulin-like growth factor binding protein 5	IGFBP5	-1.53842
neuronal PAS domain protein 2	NPAS2	-1.53842
Hermansky-Pudlak syndrome 4	HPS4	-1.53832
tripartite motif-containing 33	TRIM33	-1.53807
cysteinyl leukotriene receptor 1	CYSLTR1	-1.53792
virus-induced signaling adapter	VISA	-1.5373
Hermansky-Pudlak syndrome 4	HPS4	-1.53723
EPH receptor A3	EPHA3	-1.53695
COX19 cytochrome c oxidase assembly homolog (S. cerevisiae)	COX19	-1.53653
ganglioside-induced differentiation-associated protein 1	GDAP1	-1.53637
LIM and senescent cell antigen-like domains 3	LIMS3	-1.53598
ATP synthase, H+ transporting, mitochondrial F0 complex, subunit s (factor B)	ATP5S	-1.53591
fructose-1,6-bisphosphatase 1	FBP1	-1.53581
carbohydrate (N-acetylgalactosamine 4-0) sulfotransferase 9	CHST9	-1.53564
MACRO domain containing 1	MACROD1	-1.53554
cholesterol 25-hydroxylase	CH25H	-1.53539
erythrocyte membrane protein band 4.1-like 2	EPB41L2	-1.53525
isocitrate dehydrogenase 2 (NADP+), mitochondrial	IDH2	-1.53466
NUF2, NDC80 kinetochore complex component, homolog (S. cerevisiae)	NUF2	-1.53462
histone cluster 1, H2ai /// histone cluster 1, H2ak /// histone cluster 1, H2aj /// histone cluster 1, H2al /// histone cluster 1, H2am /// histone cluster 1, H2ag	HIST1H2AG /// HIST1H2AI /// HIST1H2AJ /// HIST1H2AK /// HIST1H2AL /// HIST1H2AM	-1.5346
3'(2'), 5'-bisphosphate nucleotidase 1	BPNT1	-1.53424
butyrophilin, subfamily 2, member A2	BTN2A2	-1.53389
thyroid adenoma associated	THADA	-1.53287
glutathione S-transferase A4	GSTA4	-1.53256
N-ethylmaleimide-sensitive factor attachment protein, beta	NAPB	-1.53256
chemokine (C-X3-C motif) ligand 1	CX3CL1	-1.53219
cytochrome P450, family 2, subfamily J, polypeptide 2	CYP2J2	-1.5321
centaurin, delta 1	CENTD1	-1.53168
coiled-coil domain containing 80	CCDC80	-1.53141
ATPase, Ca++ transporting, ubiquitous	ATP2A3	-1.53139
similar to hCG26659	LOC100130100	-1.53096
fibulin 5	FBLN5	-1.53062
Hypothetical gene supported by AK096370	FLJ39051	-1.53046
trafficking protein particle complex 4	TRAPPC4	-1.53044
death associated protein-like 1	DAPL1	-1.53027
Activating transcription factor 6	ATF6	-1.53017
myosin IIIB	MYO3B	-1.53007
spindlin family, member 3	SPIN3	-1.52989
cullin 3	CUL3	-1.5298
centromere protein J	CENPJ	-1.52979
immunoglobulin-like and fibronectin type III domain containing 1	IGFN1	-1.52915
Sp8 transcription factor	SP8	-1.52844
MOCO sulphurase C-terminal domain containing 2	MOSC2	-1.52841
solute carrier family 35, member D2	SLC35D2	-1.52823
ring finger protein 165	RNF165	-1.52823
kelch-like 12 (Drosophila)	KLHL12	-1.52802
6-phosphofructo-2-kinase/fructose-2,6-biphosphatase 3	PFKFB3	-1.52801
post-GPI attachment to proteins 1	PGAP1	-1.52792
Hypothetical protein FLJ35848	FLJ35848	-1.52741
ATPase, Ca++ transporting, type 2C, member 2	ATP2C2	-1.52741
glutathione S-transferase M4	GSTM4	-1.52738
RNA binding motif protein 6	RBM6	-1.52726
zinc finger protein 519	ZNF519	-1.52709
sterol regulatory element binding transcription factor 1	SREBF1	-1.52665
Hermansky-Pudlak syndrome 4	HPS4	-1.52653
coiled-coil domain containing 80	CCDC80	-1.52651
3'(2'), 5'-bisphosphate nucleotidase 1	BPNT1	-1.52607
transmembrane protein 132A	TMEM132A	-1.52591
A kinase (PRKA) anchor protein 1	AKAP1	-1.52496
uveal autoantigen with coiled-coil domains and ankyrin repeats	UACA	-1.52454
lysosomal-associated membrane protein 2	LAMP2	-1.52336
zinc finger protein 589	ZNF589	-1.5233
phosphorylase, glycogen; liver (Hers disease, glycogen storage disease type VI)	PYGL	-1.52322
translocated promoter region (to activated MET oncogene)	TPR	-1.52128
iduronidase, alpha-L-	IDUA	-1.52123
phosphatidic acid phosphatase type 2C	PPAP2C	-1.52012
adaptor-related protein complex 3, sigma 2 subunit	AP3S2	-1.51994
DEAD/H (Asp-Glu-Ala-Asp/His) box polypeptide 11 (CHL1-like helicase homolog, S. cerevisiae)	DDX11	-1.51988
myosin light chain kinase	MYLK	-1.51987
immunoglobulin lambda locus	IGL@	-1.51981
heat shock 27kDa protein family, member 7 (cardiovascular)	HSPB7	-1.5198
replication protein A1, 70kDa	RPA1	-1.51972
sorbin and SH3 domain containing 2	SORBS2	-1.51959
ribosomal RNA processing 15 homolog (S. cerevisiae)	RRP15	-1.51906
matrix metallopeptidase 2 (gelatinase A, 72kDa gelatinase, 72kDa type IV collagenase)	MMP2	-1.51905
Ets homologous factor	EHF	-1.51869
family with sequence similarity 43, member B	FAM43B	-1.51828
glutamate receptor, ionotropic, AMPA 2	GRIA2	-1.51798
glutamate receptor, ionotropic, AMPA 2	GRIA2	-1.51764
hypothetical LOC653602	LOC653602	-1.51711
v-abl Abelson murine leukemia viral oncogene homolog 2 (arg, Abelson-related gene)	ABL2	-1.51696
coiled-coil domain containing 32	CCDC32	-1.51554
SH3 and multiple ankyrin repeat domains 2	SHANK2	-1.51524
collagen, type IV, alpha 5 (Alport syndrome)	COL4A5	-1.51476
dodecenoyl-Coenzyme A delta isomerase (3,2 trans-enoyl-Coenzyme A isomerase)	DCI	-1.51401
myosin regulatory light chain interacting protein	MYLIP	-1.51393
claudin 3	CLDN3	-1.51391
LAG1 homolog, ceramide synthase 4	LASS4	-1.51378
CUB domain containing protein 1	CDCP1	-1.5137
pyruvate dehydrogenase phosphatase regulatory subunit	PDPR	-1.51355
glucosaminyl (N-acetyl) transferase 1, core 2 (beta-1,6-N-acetylglucosaminyltransferase)	GCNT1	-1.5128
histone cluster 1, H4i /// histone cluster 1, H4a /// histone cluster 1, H4d /// histone cluster 1, H4f /// histone cluster 1, H4k /// histone cluster 1, H4j /// histone cluster 1, H4c /// histone cluster 1, H4h /// histone cluster 1, H4b /// histone cluster 1, H4e /// histone cluster 1, H4l /// histone cluster 2, H4a /// histone cluster 4, H4 /// histone cluster 2, H4b	HIST1H4A /// HIST1H4B /// HIST1H4C /// HIST1H4D /// HIST1H4E /// HIST1H4F /// HIST1H4H /// HIST1H4I /// HIST1H4J /// HIST1H4K /// HIST1H4L /// HIST2H4A /// HIST2H4B /// HIST4H4	-1.51226
PRP4 pre-mRNA processing factor 4 homolog (yeast)	PRPF4	-1.5122
paired box 9	PAX9	-1.51205
nuclear factor (erythroid-derived 2), 45kDa	NFE2	-1.51193
ubiquitin-conjugating enzyme E2D 2 (UBC4/5 homolog, yeast)	UBE2D2	-1.51157
immunoglobulin heavy constant mu /// similar to Ig heavy chain V-III region VH26 precursor	IGHM /// LOC652494	-1.51136
KIAA0494	KIAA0494	-1.51112
chromosome 11 open reading frame 21	C11orf21	-1.51099
myosin, heavy chain 11, smooth muscle	MYH11	-1.51069
kinesin family member 21B	KIF21B	-1.5106
retinoblastoma binding protein 5	RBBP5	-1.51034
chromosome 14 open reading frame 156	C14orf156	-1.51031
F11 receptor	F11R	-1.50988
pleckstrin homology-like domain, family A, member 3	PHLDA3	-1.50975
RAB11 family interacting protein 1 (class I)	RAB11FIP1	-1.50931
transmembrane protein 67	TMEM67	-1.50924
mitogen-activated protein-binding protein-interacting protein	RP11-336K24.9	-1.50916
FXYD domain containing ion transport regulator 3	FXYD3	-1.50862
mitochondrial ribosomal protein S14	MRPS14	-1.50858
ADAM metallopeptidase with thrombospondin type 1 motif, 5 (aggrecanase-2)	ADAMTS5	-1.50848
solute carrier family 35, member D2	SLC35D2	-1.50815
neurocalcin delta	NCALD	-1.50812
aquaporin 6, kidney specific	AQP6	-1.50798
zinc finger protein 397 opposite strand	ZNF397OS	-1.50774
glucosaminyl (N-acetyl) transferase 2, I-branching enzyme (I blood group)	GCNT2	-1.50751
connective tissue growth factor	CTGF	-1.50734
serine carboxypeptidase 1	SCPEP1	-1.50708
myelin expression factor 2	MYEF2	-1.50594
chromosome 10 open reading frame 26	C10orf26	-1.50579
tripartite motif-containing 16	TRIM16	-1.50511
GNAS complex locus	GNAS	-1.50499
1-acylglycerol-3-phosphate O-acyltransferase 4 (lysophosphatidic acid acyltransferase, delta)	AGPAT4	-1.50463
myelin expression factor 2	MYEF2	-1.50436
geranylgeranyl diphosphate synthase 1	GGPS1	-1.50429
sterile alpha motif and leucine zipper containing kinase AZK	ZAK	-1.50412
TRAF3 interacting protein 2	TRAF3IP2	-1.50388
Kinase suppressor of ras 1	KSR1	-1.50364
G protein-coupled receptor 146	GPR146	-1.50344
mitochondrial transcription termination factor	MTERF	-1.50331
copine II	CPNE2	-1.50329
peroxisomal biogenesis factor 11B	PEX11B	-1.50289
Collagen, type XII, alpha 1	COL12A1	-1.50287
chemokine (C-C motif) ligand 21	CCL21	-1.50281
calneuron 1	CALN1	-1.50248
thyroid adenoma associated	THADA	-1.50221
relaxin/insulin-like family peptide receptor 1	RXFP1	-1.50198
ankyrin 2, neuronal	ANK2	-1.50196
lipoma HMGIC fusion partner	LHFP	-1.50181
mutated in colorectal cancers	MCC	-1.50169
sperm associated antigen 9	SPAG9	-1.50161
structural maintenance of chromosomes 2	SMC2	-1.50161
LIM domain only 2 (rhombotin-like 1)	LMO2	-1.50135
protocadherin beta 9	PCDHB9	-1.5011
TBC1 (tre-2/USP6, BUB2, cdc16) domain family, member 1	TBC1D1	-1.50097
3-hydroxyisobutyryl-Coenzyme A hydrolase	HIBCH	-1.50082
nicotinate phosphoribosyltransferase domain containing 1	NAPRT1	-1.50071
serine/threonine kinase 3 (STE20 homolog, yeast)	STK3	-1.50061
Hypothetical LOC441242 /// CDNA clone IMAGE:5302136	LOC441242	-1.50055
acyl-CoA synthetase long-chain family member 5	ACSL5	-1.50036
adenylate cyclase 2 (brain) /// similar to adenylate cyclase 2	ADCY2 /// LOC100133953	-1.49971
clusterin	CLU	-1.49905
FAT tumor suppressor homolog 4 (Drosophila)	FAT4	-1.49905
iduronidase, alpha-L-	IDUA	-1.49863
PRP4 pre-mRNA processing factor 4 homolog (yeast)	PRPF4	-1.49833
solute carrier family 24 (sodium/potassium/calcium exchanger), member 3	SLC24A3	-1.49826
DNA segment on chromosome 4 (unique) 234 expressed sequence	D4S234E	-1.49784
histone cluster 1, H4i /// histone cluster 1, H4a /// histone cluster 1, H4d /// histone cluster 1, H4f /// histone cluster 1, H4k /// histone cluster 1, H4j /// histone cluster 1, H4c /// histone cluster 1, H4h /// histone cluster 1, H4b /// histone cluster 1, H4e /// histone cluster 1, H4l /// histone cluster 2, H4a /// histone cluster 4, H4 /// histone cluster 2, H4b	HIST1H4A /// HIST1H4B /// HIST1H4C /// HIST1H4D /// HIST1H4E /// HIST1H4F /// HIST1H4H /// HIST1H4I /// HIST1H4J /// HIST1H4K /// HIST1H4L /// HIST2H4A /// HIST2H4B /// HIST4H4	-1.49781
KIAA0999 protein	KIAA0999	-1.49781
cell division cycle associated 5	CDCA5	-1.49767
Hypothetical protein LOC401577	LOC401577	-1.4971
polymerase (RNA) II (DNA directed) polypeptide J, 13.3kDa pseudogene	POLR2J4	-1.49692
Meis homeobox 1	MEIS1	-1.49688
proteasome (prosome, macropain) 26S subunit, non-ATPase, 11	PSMD11	-1.49657
armadillo repeat containing, X-linked 4	ARMCX4	-1.49649
chemokine (C-X-C motif) receptor 4	CXCR4	-1.4963
chromosome 5 open reading frame 34	C5orf34	-1.4962
aldehyde dehydrogenase 3 family, member B2	ALDH3B2	-1.49615
ADP-ribosylation factor 1	ARF1	-1.49592
sorbin and SH3 domain containing 2	SORBS2	-1.49588
Kazal-type serine peptidase inhibitor domain 1	KAZALD1	-1.49584
ATPase, H+ transporting, lysosomal 56/58kDa, V1 subunit B2	ATP6V1B2	-1.49579
solute carrier family 1 (glial high affinity glutamate transporter), member 3	SLC1A3	-1.49549
olfactomedin-like 3	OLFML3	-1.49534
interferon stimulated exonuclease gene 20kDa-like 2	ISG20L2	-1.49497
B-cell CLL/lymphoma 11A (zinc finger protein)	BCL11A	-1.49469
zinc finger protein 77	ZNF77	-1.49444
paired box 6	PAX6	-1.49428
lectin, galactoside-binding, soluble, 9 (galectin 9)	LGALS9	-1.4939
neurexin 3	NRXN3	-1.49379
carbonyl reductase 4	CBR4	-1.49302
integrator complex subunit 7	INTS7	-1.493
delta/notch-like EGF repeat containing	DNER	-1.49282
erythrocyte membrane protein band 4.1 like 4A	EPB41L4A	-1.49246
Casein kinase 1, alpha 1	CSNK1A1	-1.49239
zinc finger protein 207	ZNF207	-1.49236
cylindromatosis (turban tumor syndrome)	CYLD	-1.49233
pleckstrin homology-like domain, family A, member 1	PHLDA1	-1.49228
X-ray repair complementing defective repair in Chinese hamster cells 5 (double-strand-break rejoining; Ku autoantigen, 80kDa)	XRCC5	-1.49222
cystatin B (stefin B)	CSTB	-1.49203
acyl-CoA thioesterase 4	ACOT4	-1.49196
DEAD/H (Asp-Glu-Ala-Asp/His) box polypeptide 11 (CHL1-like helicase homolog, S. cerevisiae) /// DEAD/H (Asp-Glu-Ala-Asp/His) box polypeptide 12 (CHL1-like helicase homolog, S. cerevisiae) /// DEAD/H (Asp-Glu-Ala-Asp/His) box polypeptide 11-like	DDX11 /// DDX12 /// LOC642846	-1.49188
interferon regulatory factor 6	IRF6	-1.49181
ATP-binding cassette, sub-family A (ABC1), member 5	ABCA5	-1.49178
P450 (cytochrome) oxidoreductase	POR	-1.49169
TNNI3 interacting kinase	TNNI3K	-1.49132
synaptopodin 2	SYNPO2	-1.49098
Ras-related GTP binding D	RRAGD	-1.49094
solute carrier family 25 (mitochondrial carrier; adenine nucleotide translocator), member 4	SLC25A4	-1.49094
mucosa associated lymphoid tissue lymphoma translocation gene 1	MALT1	-1.49004
Ly6/neurotoxin 1	LYNX1	-1.48996
hexamethylene bis-acetamide inducible 1	HEXIM1	-1.48943
interferon-induced protein with tetratricopeptide repeats 5	IFIT5	-1.48941
hypothetical protein LOC284801	LOC284801	-1.48921
serpin peptidase inhibitor, clade I (neuroserpin), member 1	SERPINI1	-1.4892
Similar to hCG1774772	LOC100132798	-1.48895
keratin 16 (focal non-epidermolytic palmoplantar keratoderma)	KRT16	-1.48885
l(3)mbt-like 3 (Drosophila)	L3MBTL3	-1.48853
LIM domain containing preferred translocation partner in lipoma	LPP	-1.48838
neurturin	NRTN	-1.48836
mitogen-activated protein kinase kinase 5	MAP2K5	-1.48814
KIAA1549	KIAA1549	-1.48809
hypothetical gene supported by AK091454	LOC285382	-1.48808
sushi domain containing 2	SUSD2	-1.48743
taste receptor, type 2, member 5	TAS2R5	-1.4873
GNAS complex locus	GNAS	-1.48726
TEA domain family member 2	TEAD2	-1.48721
pyruvate dehydrogenase phosphatase isoenzyme 2	PDP2	-1.48711
GATA zinc finger domain containing 2B	GATAD2B	-1.48703
ATPase, H+ transporting V0 subunit e2	ATP6V0E2	-1.48681
HRAS-like suppressor	HRASLS	-1.48681
sorbin and SH3 domain containing 2	SORBS2	-1.48675
CD74 molecule, major histocompatibility complex, class II invariant chain	CD74	-1.48642
FLJ41603 protein	FLJ41603	-1.48621
paired-like homeodomain 1	PITX1	-1.48577
WD repeat domain 26	WDR26	-1.48551
SET domain containing 6	SETD6	-1.48548
coiled-coil domain containing 125	CCDC125	-1.48536
cysteine dioxygenase, type I	CDO1	-1.48492
family with sequence similarity 155, member A	FAM155A	-1.48478
KIAA1370	KIAA1370	-1.48457
polymerase (RNA) II (DNA directed) polypeptide J, 13.3kDa pseudogene /// DNA directed RNA polymerase II polypeptide J-related /// similar to hCG1989139 /// PMS2 postmeiotic segregation increased 2 (S. cerevisiae)-like /// similar to POLR2J4 protein	LOC100134053 /// LOC392713 /// LOC441259 /// POLR2J2 /// POLR2J4	-1.48436
arginine/serine-rich coiled-coil 1	RSRC1	-1.48435
endosulfine alpha	ENSA	-1.48425
microtubule-actin crosslinking factor 1	MACF1	-1.48421
ankyrin repeat domain 6	ANKRD6	-1.48421
RAN guanine nucleotide release factor	RANGRF	-1.48413
cytoplasmic linker associated protein 2	CLASP2	-1.48411
G protein-coupled receptor kinase 4	GRK4	-1.48357
phosphoglycerate dehydrogenase	PHGDH	-1.48347
T cell receptor alpha locus /// T cell receptor alpha variable 20 /// T cell receptor alpha joining 17 /// T cell receptor alpha constant	TRA@ /// TRAC /// TRAJ17 /// TRAV20	-1.48312
phosphatidylinositol 4-kinase, catalytic, beta	PI4KB	-1.48304
Zinc finger protein 362	ZNF362	-1.48298
structural maintenance of chromosomes 2	SMC2	-1.48271
dapper, antagonist of beta-catenin, homolog 3 (Xenopus laevis)	DACT3	-1.4825
glutamyl-prolyl-tRNA synthetase	EPRS	-1.48237
chromatin modifying protein 4C	CHMP4C	-1.4821
Transcribed locus	chromosome 18 open reading frame 50	-1.4817
urocortin	UCN	-1.48149
thioredoxin 2	TXN2	-1.48138
chromosome 1 open reading frame 218 /// DENN/MADD domain containing 1B	C1orf218 /// DENND1B	-1.48134
dolichyl-phosphate mannosyltransferase polypeptide 3	DPM3	-1.48122
histone cluster 1, H3d	HIST1H3D	-1.4811
serologically defined colon cancer antigen 8	SDCCAG8	-1.48106
nudix (nucleoside diphosphate linked moiety X)-type motif 4 /// nudix (nucleoside diphosphate linked moiety X)-type motif 4 pseudogene 1	NUDT4 /// NUDT4P1	-1.48101
DEAH (Asp-Glu-Ala-Asp/His) box polypeptide 57	DHX57	-1.48083
grainyhead-like 2 (Drosophila)	GRHL2	-1.48075
tripartite motif-containing 31	TRIM31	-1.48062
transcription factor AP-2 gamma (activating enhancer binding protein 2 gamma)	TFAP2C	-1.48061
BCL2-like 11 (apoptosis facilitator)	BCL2L11	-1.48048
Protein tyrosine phosphatase, non-receptor type 9	PTPN9	-1.48019
guanine nucleotide binding protein (G protein), beta 5	GNB5	-1.47959
protein tyrosine phosphatase, receptor type, M	PTPRM	-1.47928
metallothionein 1E	MT1E	-1.47919
sulfatase 2	SULF2	-1.479
chromosome 10 open reading frame 58	C10orf58	-1.47889
methylenetetrahydrofolate dehydrogenase (NADP+ dependent) 2-like	MTHFD2L	-1.47865
chromosome 1 open reading frame 19	C1orf19	-1.47857
raftlin, lipid raft linker 1	RFTN1	-1.47799
mitochondrial ribosomal protein S25	MRPS25	-1.47797
small nuclear RNA activating complex, polypeptide 3, 50kDa	SNAPC3	-1.47787
neuronal PAS domain protein 3	NPAS3	-1.47783
major histocompatibility complex, class I, B /// major histocompatibility complex, class I, C /// MHC class I polypeptide-related sequence A /// MHC class I polypeptide-related sequence B	HLA-B /// HLA-C /// MICA /// MICB /// XXbac-BPG181B23.1	-1.47756
forkhead box A1	FOXA1	-1.47748
chromosome 10 open reading frame 47	C10orf47	-1.47727
transmembrane 7 superfamily member 3	TM7SF3	-1.4772
IQ motif and WD repeats 1	IQWD1	-1.47693
ATG10 autophagy related 10 homolog (S. cerevisiae)	ATG10	-1.47692
importin 9	IPO9	-1.47684
calcium binding tyrosine-(Y)-phosphorylation regulated	CABYR	-1.47659
hypothetical protein MGC39821	MGC39821	-1.47659
delta-like 1 (Drosophila)	DLL1	-1.47648
zinc finger, MYM-type 2	ZMYM2	-1.4762
toll-like receptor 4	TLR4	-1.47619
zinc finger protein 253	ZNF253	-1.47506
methylmalonic aciduria (cobalamin deficiency) cblA type	MMAA	-1.47498
ubiquitin specific peptidase 14 (tRNA-guanine transglycosylase)	USP14	-1.47491
major histocompatibility complex, class I, B	HLA-B	-1.47455
SRY (sex determining region Y)-box 12	SOX12	-1.47454
Protein disulfide isomerase family A, member 3	PDIA3	-1.47445
TGFB-induced factor homeobox 1	TGIF1	-1.47421
telomerase reverse transcriptase	TERT	-1.4742
Kruppel-like factor 12	KLF12	-1.47375
Catalase	CAT	-1.47333
chemokine (C-X-C motif) ligand 11	CXCL11	-1.47288
myelin protein zero-like 1	MPZL1	-1.47285
major histocompatibility complex, class II, DQ beta 1	HLA-DQB1	-1.47263
amyotrophic lateral sclerosis 2 (juvenile) chromosome region, candidate 4	ALS2CR4	-1.47251
prohibitin	PHB	-1.47221
casein kinase 1, epsilon	CSNK1E	-1.4717
coiled-coil domain containing 50	CCDC50	-1.4716
solute carrier family 6 (neurotransmitter transporter, noradrenalin), member 2	SLC6A2	-1.47155
similar to rho guanine nucleotide exchange factor 5	LOC728377	-1.47134
LIM domain kinase 2	LIMK2	-1.47127
dickkopf homolog 2 (Xenopus laevis)	DKK2	-1.47119
POZ (BTB) and AT hook containing zinc finger 1	PATZ1	-1.47118
acyloxyacyl hydrolase (neutrophil)	AOAH	-1.47109
HORMA domain containing 1	HORMAD1	-1.47098
homeobox D11	HOXD11	-1.47065
zinc finger protein 713	ZNF713	-1.47044
Ras-like without CAAX 1	RIT1	-1.47031
obscurin-like 1	OBSL1	-1.46979
receptor (G protein-coupled) activity modifying protein 3	RAMP3	-1.46977
retinoid X receptor, alpha	RXRA	-1.46966
inositol 1,4,5-triphosphate receptor, type 2	ITPR2	-1.46952
kelch-like 20 (Drosophila)	KLHL20	-1.46949
nudix (nucleoside diphosphate linked moiety X)-type motif 4 /// nudix (nucleoside diphosphate linked moiety X)-type motif 4 pseudogene 1	NUDT4 /// NUDT4P1	-1.46919
arginase, type II	ARG2	-1.46913
hypothetical gene supported by AJ002784	LOC440338	-1.46909
hypothetical protein LOC286161	LOC286161	-1.46905
immunoglobulin heavy locus /// immunoglobulin heavy constant alpha 1 /// immunoglobulin heavy constant alpha 2 (A2m marker) /// immunoglobulin heavy constant delta /// immunoglobulin heavy constant gamma 1 (G1m marker) /// immunoglobulin heavy constant gamma 3 (G3m marker) /// immunoglobulin heavy constant gamma 4 (G4m marker) /// immunoglobulin heavy constant mu /// immunoglobulin heavy variable…	IGH@ /// IGHA1 /// IGHA2 /// IGHD /// IGHG1 /// IGHG3 /// IGHG4 /// IGHM /// IGHV4-31 /// LOC100126583 /// LOC100134331 /// LOC642131 /// LOC652128	-1.46902
microtubule associated serine/threonine kinase family member 4 /// hypothetical protein LOC100128443	LOC100128443 /// MAST4	-1.46869
MAM domain containing 2	MAMDC2	-1.46822
sema domain, transmembrane domain (TM), and cytoplasmic domain, (semaphorin) 6A	SEMA6A	-1.46816
TatD DNase domain containing 3	TATDN3	-1.46816
pleckstrin homology domain containing, family O member 1	PLEKHO1	-1.46794
adenylate kinase 2	AK2	-1.46786
myosin light chain kinase	MYLK	-1.4676
flavin containing monooxygenase 4	FMO4	-1.46752
glycoprotein, alpha-galactosyltransferase 1	GGTA1	-1.46739
forkhead box S1	FOXS1	-1.46739
serum deprivation response (phosphatidylserine binding protein)	SDPR	-1.46729
chemokine (C-X3-C motif) receptor 1	CX3CR1	-1.46698
selenophosphate synthetase 1	SEPHS1	-1.46682
ephrin-A4	EFNA4	-1.46679
FAT tumor suppressor homolog 3 (Drosophila)	FAT3	-1.46677
carbonic anhydrase X	CA10	-1.4666
FK506 binding protein 11, 19 kDa	FKBP11	-1.46659
solute carrier family 6 (neurotransmitter transporter, serotonin), member 4	SLC6A4	-1.46629
SH3 and multiple ankyrin repeat domains 2	SHANK2	-1.46628
transmembrane protein 109	TMEM109	-1.46608
DPH4, JJJ3 homolog (S. cerevisiae)	DPH4	-1.46601
DNL-type zinc finger	DNLZ	-1.46598
chromosome 2 open reading frame 65	C2orf65	-1.46564
zinc finger protein 518B	ZNF518B	-1.46549
small inducible cytokine subfamily E, member 1 (endothelial monocyte-activating)	SCYE1	-1.4653
inhibitor of Bruton agammaglobulinemia tyrosine kinase	IBTK	-1.46529
cell adhesion molecule 1	CADM1	-1.46521
protein tyrosine phosphatase, receptor type, M	PTPRM	-1.46506
major histocompatibility complex, class II, DQ alpha 1	HLA-DQA1	-1.465
mutS homolog 5 (E. coli) /// chromosome 6 open reading frame 26	C6orf26 /// MSH5	-1.46461
coiled-coil domain containing 150	CCDC150	-1.46447
sulfatase 2	SULF2	-1.4644
collagen, type XVIII, alpha 1	COL18A1	-1.46429
adenosine deaminase, tRNA-specific 1	ADAT1	-1.46408
NADPH oxidase 4	NOX4	-1.46399
mitogen-activated protein kinase kinase kinase 4	MAP3K4	-1.46372
retinol binding protein 1, cellular	RBP1	-1.46369
major histocompatibility complex, class I, F	HLA-F	-1.46337
TEK tyrosine kinase, endothelial (venous malformations, multiple cutaneous and mucosal)	TEK	-1.46268
DIS3 mitotic control homolog (S. cerevisiae)	DIS3	-1.46251
chromosome 1 open reading frame 97	C1orf97	-1.46249
LUC7-like (S. cerevisiae)	LUC7L	-1.4624
zinc finger protein 585A	ZNF585A	-1.4622
secretory carrier membrane protein 3	SCAMP3	-1.46203
transcription factor 3 (E2A immunoglobulin enhancer binding factors E12/E47)	TCF3	-1.46189
dachsous 2 (Drosophila)	DCHS2	-1.46165
myosin X	MYO10	-1.46154
neurofascin homolog (chicken)	NFASC	-1.46147
forkhead box O3	FOXO3	-1.46139
ankyrin repeat domain 37	ANKRD37	-1.46127
chromosome 9 open reading frame 86	C9orf86	-1.46091
pyruvate dehydrogenase phosphatase regulatory subunit	PDPR	-1.46089
family with sequence similarity 36, member A	FAM36A	-1.46066
forkhead box P2	FOXP2	-1.46045
zinc finger protein 33A	ZNF33A	-1.46012
KIAA1429	KIAA1429	-1.46002
importin 9	IPO9	-1.45977
extracellular matrix protein 2, female organ and adipocyte specific	ECM2	-1.45971
SEC62 homolog (S. cerevisiae)	SEC62	-1.45965
discoidin, CUB and LCCL domain containing 1	DCBLD1	-1.4596
fucosyltransferase 6 (alpha (1,3) fucosyltransferase)	FUT6	-1.45935
nuclear receptor binding SET domain protein 1	NSD1	-1.45903
F-box protein 32	FBXO32	-1.45893
PDZ and LIM domain 5	PDLIM5	-1.45868
fucosyltransferase 5 (alpha (1,3) fucosyltransferase) /// NADH dehydrogenase (ubiquinone) 1 alpha subcomplex, 11, 14.7kDa	FUT5 /// NDUFA11	-1.45862
chromosome 1 open reading frame 176	C1orf176	-1.45862
claudin 23	CLDN23	-1.4586
F-box protein 28	FBXO28	-1.45856
hemochromatosis	HFE	-1.45822
transforming, acidic coiled-coil containing protein 1	TACC1	-1.45735
major histocompatibility complex, class I, B /// major histocompatibility complex, class I, C /// MHC class I polypeptide-related sequence A /// MHC class I polypeptide-related sequence B /// family with sequence similarity 20, member B	FAM20B /// HLA-B /// HLA-C /// MICA /// MICB /// XXbac-BPG181B23.1	-1.45731
protein tyrosine phosphatase, receptor type, R	PTPRR	-1.45697
coiled-coil domain containing 80	CCDC80	-1.45692
chromosome 1 open reading frame 107	C1orf107	-1.45671
serologically defined colon cancer antigen 3 /// similar to serologically defined colon cancer antigen 3	LOC646891 /// SDCCAG3	-1.45617
LAG1 homolog, ceramide synthase 6	LASS6	-1.45613
Stress-associated endoplasmic reticulum protein family member 2	SERP2	-1.45607
similar to cell recognition molecule CASPR3 /// contactin associated protein-like 3B	CNTNAP3B /// LOC643827	-1.45603
polymerase (DNA directed) iota	POLI	-1.45598
chromosome 20 open reading frame 199	C20orf199	-1.45551
Transmembrane protein 63A	TMEM63A	-1.45543
solute carrier family 7, (cationic amino acid transporter, y+ system) member 11	SLC7A11	-1.4553
HCLS1 associated protein X-1	HAX1	-1.45491
CDC42 effector protein (Rho GTPase binding) 3	CDC42EP3	-1.45471
Rho-type GTPase-activating protein RICH2	RICH2	-1.45459
REX2, RNA exonuclease 2 homolog (S. cerevisiae)	REXO2	-1.45415
transmembrane protein 183A	TMEM183A	-1.45414
amyloid beta (A4) precursor protein-binding, family A, member 2 (X11-like)	APBA2	-1.45414
Sp1 transcription factor	SP1	-1.45389
Zinc finger and BTB domain containing 1	ZBTB1	-1.45387
Rho guanine nucleotide exchange factor (GEF) 10	ARHGEF10	-1.45367
RAS p21 protein activator 4 /// hypothetical protein FLJ21767 /// similar to HSPC047 protein /// similar to RAS p21 protein activator 4	FLJ21767 /// LOC100132214 /// LOC100133005 /// LOC100134722 /// RASA4	-1.45339
tropomyosin 3	TPM3	-1.45327
G protein-coupled receptor 173	GPR173	-1.4531
chromosome 1 open reading frame 74	C1orf74	-1.45273
chromosome 10 open reading frame 18	C10orf18	-1.45271
kinesin family member 26B	KIF26B	-1.45264
pleckstrin homology, Sec7 and coiled-coil domains 1(cytohesin 1)	PSCD1	-1.45255
ubiquitin specific peptidase 32	USP32	-1.45243
nicotinamide nucleotide adenylyltransferase 3	NMNAT3	-1.45145
monoamine oxidase B	MAOB	-1.45134
Ras-like without CAAX 1	RIT1	-1.45128
phospholipid transfer protein	PLTP	-1.45096
neurexin 3	NRXN3	-1.45087
tryptase alpha/beta 1 /// tryptase beta 2	TPSAB1 /// TPSB2	-1.45061
heparan sulfate (glucosamine) 3-O-sulfotransferase 3B1	HS3ST3B1	-1.45051
progesterone receptor	PGR	-1.4504
Pleckstrin homology domain containing, family A (phosphoinositide binding specific) member 8	PLEKHA8	-1.44992
serine/threonine kinase 4	STK4	-1.44976
pleiotropic regulator 1 (PRL1 homolog, Arabidopsis)	PLRG1	-1.44952
Boc homolog (mouse)	BOC	-1.44938
microseminoprotein, beta-	MSMB	-1.44934
methylmalonic aciduria (cobalamin deficiency) cblA type	MMAA	-1.44907
serpin peptidase inhibitor, clade A (alpha-1 antiproteinase, antitrypsin), member 1	SERPINA1	-1.44896
heparan sulfate (glucosamine) 3-O-sulfotransferase 1	HS3ST1	-1.4489
chromosome 11 open reading frame 52	C11orf52	-1.44859
stromal antigen 1	STAG1	-1.44842
major histocompatibility complex, class II, DQ beta 1 /// major histocompatibility complex, class II, DQ beta 2 /// major histocompatibility complex, class II, DR beta 1 /// major histocompatibility complex, class II, DR beta 2 (pseudogene) /// major histocompatibility complex, class II, DR beta 3 /// major histocompatibility complex, class II, DR beta 4 /// major histocompatibility complex, clas…	hCG_1998957 /// HLA-DQB1 /// HLA-DQB2 /// HLA-DRB1 /// HLA-DRB2 /// HLA-DRB3 /// HLA-DRB4 /// HLA-DRB5 /// LOC100133484 /// LOC100133583 /// LOC100133661 /// LOC100133811 /// LOC730415 /// RNASE2 /// ZNF749	-1.44814
SERTA domain containing 4	SERTAD4	-1.44807
chromosome 1 open reading frame 9	C1orf9	-1.44807
A kinase (PRKA) anchor protein 11	AKAP11	-1.44763
jumonji domain containing 3, histone lysine demethylase	JMJD3	-1.44756
LSM7 homolog, U6 small nuclear RNA associated (S. cerevisiae)	LSM7	-1.44755
zinc finger protein 207	ZNF207	-1.44741
chemokine (C-X-C motif) ligand 11	CXCL11	-1.44734
enabled homolog (Drosophila)	ENAH	-1.44694
SLIT-ROBO Rho GTPase activating protein 3	SRGAP3	-1.44663
tumor necrosis factor (ligand) superfamily, member 14	TNFSF14	-1.44648
Gasdermin-like	GSDML	-1.44634
MLF1 interacting protein	MLF1IP	-1.44627
chromosome 1 open reading frame 31	C1orf31	-1.44619
myotubularin related protein 4	MTMR4	-1.44608
Inositol 1,4,5-trisphosphate 3-kinase B	ITPKB	-1.44581
trophoblast-derived noncoding RNA	TncRNA	-1.44561
abhydrolase domain containing 2	ABHD2	-1.44557
KIAA1147	KIAA1147	-1.44547
KIAA0999 protein	KIAA0999	-1.4454
apolipoprotein B mRNA editing enzyme, catalytic polypeptide-like 3G /// apolipoprotein B mRNA editing enzyme, catalytic polypeptide-like 3F	APOBEC3F /// APOBEC3G	-1.44501
ribonuclease P/MRP 30kDa subunit	RPP30	-1.445
tripartite motif-containing 9	TRIM9	-1.44491
hypothetical protein MGC33846	MGC33846	-1.44455
cysteine and glycine-rich protein 1	CSRP1	-1.44453
FK506 binding protein 11, 19 kDa	FKBP11	-1.44448
protein phosphatase 1, regulatory (inhibitor) subunit 3B	PPP1R3B	-1.4443
aspartate beta-hydroxylase domain containing 2	ASPHD2	-1.44426
cytokine induced apoptosis inhibitor 1	CIAPIN1	-1.44423
interleukin 1 receptor, type I	IL1R1	-1.44414
lipoprotein lipase	LPL	-1.44395
Zinc finger protein 678	ZNF678	-1.44381
aristaless related homeobox	ARX	-1.44367
leucine rich repeat containing 2	LRRC2	-1.44322
natriuretic peptide receptor C/guanylate cyclase C (atrionatriuretic peptide receptor C)	NPR3	-1.44306
tensin 3	TNS3	-1.44252
hairy/enhancer-of-split related with YRPW motif 2	HEY2	-1.44213
homeobox D10	HOXD10	-1.44212
immunoglobulin superfamily, member 8	IGSF8	-1.442
chromosome 1 open reading frame 97	C1orf97	-1.442
mitochondrial ribosomal protein S28	MRPS28	-1.44185
lines homolog 1 (Drosophila)	LINS1	-1.4416
SMAD family member 4	SMAD4	-1.44151
family with sequence similarity 129, member A	FAM129A	-1.44151
integrin, alpha 4 (antigen CD49D, alpha 4 subunit of VLA-4 receptor)	ITGA4	-1.44131
cell adhesion molecule 1	CADM1	-1.44055
chromosome 10 open reading frame 35	C10orf35	-1.44043
ecotropic viral integration site 1	EVI1	-1.4404
hydroxysteroid (17-beta) dehydrogenase 6 homolog (mouse)	HSD17B6	-1.4402
v-maf musculoaponeurotic fibrosarcoma oncogene homolog (avian)	MAF	-1.43986
claudin 23	CLDN23	-1.43985
hypothetical protein LOC729085	LOC729085	-1.43961
zinc finger protein 658	ZNF658	-1.43892
collagen, type IV, alpha 6	COL4A6	-1.43885
KIAA1632	KIAA1632	-1.43875
zinc finger protein 207	ZNF207	-1.43863
zinc finger, MYM-type 2	ZMYM2	-1.43858
coactosin-like 1 (Dictyostelium)	COTL1	-1.43843
Zinc finger protein 254	ZNF254	-1.43831
tumor protein D52-like 1	TPD52L1	-1.43825
galectin-related protein	HSPC159	-1.43814
coagulation factor VIII, procoagulant component (hemophilia A)	F8	-1.43764
polymerase (DNA directed) kappa	POLK	-1.43753
zinc finger protein 660	ZNF660	-1.43747
transmembrane protein 107	TMEM107	-1.43694
melanocortin 4 receptor	MC4R	-1.43689
fumarate hydratase	FH	-1.43674
serine/threonine kinase 33	STK33	-1.43671
hypothetical LOC401320	LOC401320	-1.43671
Phosphoribosyl pyrophosphate synthetase 2	PRPS2	-1.43671
glycerophosphodiester phosphodiesterase domain containing 3	GDPD3	-1.43644
Doublecortin-like kinase 1	DCLK1	-1.43639
zinc finger protein 36, C3H type-like 1	ZFP36L1	-1.43639
ribosomal protein S6 kinase, 90kDa, polypeptide 5	RPS6KA5	-1.43626
chromosome 4 open reading frame 38	C4orf38	-1.43585
phosphatidic acid phosphatase type 2B	PPAP2B	-1.43583
zinc finger, FYVE domain containing 16	ZFYVE16	-1.43582
keratinocyte associated protein 2	KRTCAP2	-1.4356
microtubule associated serine/threonine kinase family member 4 /// hypothetical protein LOC100128443	LOC100128443 /// MAST4	-1.43556
ubiquitin associated protein 2	UBAP2	-1.4355
Ring finger protein 12	RNF12	-1.43545
zinc finger protein 493	ZNF493	-1.43539
phospholipase D1, phosphatidylcholine-specific	PLD1	-1.43494
SWI/SNF related, matrix associated, actin dependent regulator of chromatin, subfamily c, member 2	SMARCC2	-1.4348
leucine rich repeat containing 37, member A4 (pseudogene)	LRRC37A4	-1.43462
prefoldin subunit 2	PFDN2	-1.43436
ATP-binding cassette, sub-family A (ABC1), member 11 (pseudogene)	ABCA11	-1.43429
hypothetical LOC339541	MGC33556	-1.4342
ubiquitin specific peptidase 42	USP42	-1.43407
UDP-N-acetyl-alpha-D-galactosamine:polypeptide N-acetylgalactosaminyltransferase 10 (GalNAc-T10)	GALNT10	-1.43403
transducin-like enhancer of split 3 (E(sp1) homolog, Drosophila)	TLE3	-1.43373
tumor necrosis factor receptor superfamily, member 25	TNFRSF25	-1.4337
glycoprotein (transmembrane) nmb	GPNMB	-1.43334
endomucin	EMCN	-1.43322
DEAD (Asp-Glu-Ala-Asp) box polypeptide 59	DDX59	-1.43317
SH3-domain binding protein 4	SH3BP4	-1.43308
homeobox B8	HOXB8	-1.43296
leukotriene B4 12-hydroxydehydrogenase	LTB4DH	-1.43292
B cell RAG associated protein	GALNAC4S-6ST	-1.43256
argininosuccinate lyase	ASL	-1.43255
cytochrome P450, family 2, subfamily F, polypeptide 1	CYP2F1	-1.43209
protocadherin gamma subfamily A, 10	PCDHGA10	-1.43206
phospholipase A1 member A	PLA1A	-1.43179
NEDD4 binding protein 2-like 2	N4BP2L2	-1.4317
[truncated: 6,886 more rows]
