# Supplementary material for: Progesterone Inhibits Epithelial-to-Mesenchymal Transition in Endometrial Cancer
Source: PLoS One. 2012 Jan 25;7(1):e30840. doi: 10.1371/journal.pone.0030840 (PMC3266274; doi:10.1371/journal.pone.0030840)
Supplement: Table S3 — List of differentially regulated pathways in progressive versus non-progressive endometrial cancer patients. A list of differentially regulated genes in the progressive group was entered in Ingenuity pathway analysis software. A fold chance of +/−1.25 was used as a cutoff point. P-values were calculated with a Fishers exact test and a p-value<0.05 was considered statistically significant. (XLS) [file pone.0030840.s003.xls]

## Sheet: Sheet1
Table S3: List of differentially regulated pathways in progressive versus non-progressive endometrial cancer patients
A list of differentially regulated genes in the progressive group was entered in Ingenuity pathway analysis software. A fold chance of +/- 1.25 was used as a cutoff point. P-values were calculated with a Fishers exact test and a p-value <0.05 was considered statistically significant.
Ingenuity Canonical Pathways	P-value	Downregulated	No change	Upregulated	No overlap with dataset	Molecules
Integrin Signaling	1.28825e-06	29/205 (14%)	0/205 (0%)	61/205 (30%)	115/205 (56%)	RAP2B, ARHGAP26, MAPK1, PIK3R1, DIRAS3, SOS2, TLN1, LIMS1, PTEN, MYLK, PTK2, PARVB, TSPAN3, PAK1, RHOB, ITGA11, ARF4, GRB7, CAV1, ITGAV, ITGB4, ACTG2 (includes EG:72), ITGB5, ITGA4, RND2, ACTR2, CAPN6, RRAS, CRKL, ITGA6, RAC1, ITGA5, TSPAN2, RHOJ, BCAR3, RAP1A, PIK3R3, ARHGAP5, RHOQ, ITGAM, ARPC2, PPP1R12B, ZYX, CAPN2, PAK7, CAPN7, ITGB6, CAPN3, FYN, PPP1CC, ITGA2B (includes EG:3674), PIK3CA, RAL…
Molecular Mechanisms of Cancer	7.07946e-06	60/375 (16%)	0/375 (0%)	79/375 (21%)	236/375 (63%)	RAP2B, SHH, TGFBR1, BMP4, APH1B, PIK3R1, TAB2, SOS2, CDKN2C, NCSTN, MAPK13, CCND1, RB1, PAK1, GNA15, GNA13, HIPK2, CASP10, TP53, RND2, TFDP1, RRAS, NFKB2, TCF3, RAP1A, RASGRF2, CCND3, IRS1, PAK7, MAP2K3, MAP2K6, FYN, PIK3CA, TCF4, RALA, CDC42, ARHGEF7, LRP6, CTNNA1, BMPR2, PSEN2, JAK2, MAP3K5 (includes EG:4217), GNA14, CASP6, ARHGEF19, SOS1, E2F5, RHOU, ARHGEF3, CTNNB1, CASP8, PRKDC, PAK2, RHOC, …
Oncostatin M Signaling	7.24436e-06	6/35 (17%)	0/35 (0%)	17/35 (49%)	12/35 (34%)	IL6ST, TIMP3, JAK1, NRAS, MAPK1, MMP3, GRB2, RRAS, MMP13, JAK2, SHC1, RRAS2, MT2A, SOS1, OSMR, PLAU, STAT5B, STAT1, CHI3L1, ELK1, JAK3, MAP2K1, MMP1 (includes EG:4312)
Antigen Presentation Pathway	2.34423e-05	21/43 (49%)	0/43 (0%)	4/43 (9%)	18/43 (42%)	HLA-DOA, PDIA3, HLA-DQA1, HLA-DRB1, HLA-DMB, PSMB8, CD74, TAP1, HLA-DPA1, HLA-F, HLA-A, HLA-DRA, HLA-B, HLA-G, HLA-DPB1, HLA-C, PSMB9, CALR, HLA-DMA, NLRC5 (includes EG:84166), CANX, MR1, HLA-DRB4, HLA-E, TAP2
Non-Small Cell Lung Cancer Signaling	2.63027e-05	13/82 (16%)	0/82 (0%)	24/82 (29%)	45/82 (55%)	CDKN2A, PIK3CA, BAD, MAPK1, PA2G4, PIK3R1, SOS2, CCND1, RB1, STK4, CASP9, RARB, FOXO3, SOS1, AKT3, ERBB2, RASSF5, MAP2K1, PRKCA, TP53, FHIT, NRAS, PIK3C2A, TFDP1, ITPR2, GRB2, RRAS, CDK6, RAC1, PIK3C2G, PLCG1, ITPR1, PIK3R3, RRAS2, ITPR3, TGFA, RXRA
IGF-1 Signaling	5.12861e-05	17/100 (17%)	0/100 (0%)	29/100 (29%)	54/100 (54%)	PRKACB, IGFBP4, PIK3CA, CTGF, BAD, MAPK1, YWHAH, PIK3R1, SOS2, IGFBP7, PTK2, SHC1, CASP9, IGF1, FOXO3, SOS1, CSNK2A1, AKT3, IRS2, MAP2K1, RPS6KB1, PXN, NRAS, PIK3C2A, YWHAE, GRB2, RRAS, RAC1, MAPK8, PIK3C2G, IGFBP5, NEDD4, IGFBP2, PIK3R3, FOS, PRKCI, PRKAR2B, RRAS2, NOV, PTPN11, IRS1, IGFBP3, PRKAG2, SFN, ELK1, PRKAR1A
Role of Tissue Factor in Cancer	7.24436e-05	12/116 (10%)	0/116 (0%)	41/116 (35%)	63/116 (54%)	CTGF, MAPK1, PIK3R1, CXCL1, MMP13, LIMK2, MAPK13, PTEN, VEGFA, LCK, PAK1, ITGAV, GNA13, FGR, ITGB5, TP53, PDIA2, IL8, RPS6KB1, RRAS, ITGA6, RAC1, HBEGF, PIK3R3, BCL2L1, RPS6KA6, PTPN11, CFL2, RPS6KA1, FYN, PIK3CA, CDC42, RPS6KA3, GNA14, JAK2, EIF4E, AKT3, STAT5B, MMP1 (includes EG:4312), PRKCA, ITGB1, NRAS, PIK3C2A, EGR1, PIK3C2G, PLAUR, ITGA3, F3, FRK, RRAS2, LYN, IL1B, RPS6KA5
Leukocyte Extravasation Signaling	9.54993e-05	29/199 (15%)	0/199 (0%)	53/199 (27%)	117/199 (59%)	MAPK1, MMP3, PIK3R1, JAM2, MMP13, MAP3K4, MAPK13, CLDN6, PTK2, CTNNA2, TXK, EZR, ACTG2 (includes EG:72), ITGA4, TIMP2, ITK, CRKL, RAC1, RDX, THY1, MMP2, BMX, RAPGEF3, RAP1A, PIK3R3, ARHGAP5, CLDN23, ITGAM, CLDN8, CDH5, PTPN11, JAM3, RAP1GAP (includes EG:5909), NCF2, PECAM1, VAV1, CTTN, CLDN11, MMP7, PIK3CA, ICAM1, CDC42, MMP14, ACTA2, CTNNA1, RAPGEF4, WASL (includes EG:8976), TIMP1, MMP26, MMP11,…
Glioblastoma Multiforme Signaling	0.000141254	27/166 (16%)	0/166 (0%)	39/166 (23%)	100/166 (60%)	CDKN2A, MAPK1, DIRAS3, PIK3R1, SOS2, WNT16, CCND1, PTEN, MYC, RB1, RHOB, FZD2, WNT5B, RND2, TP53, RPS6KB1, ITPR2, RRAS, CDK6, RAC1, RHOJ, ITPR1, TCF3, PIK3R3, IGF2, RHOQ, ITPR3, FZD3, LEF1, FZD5, PDGFD, CDK2, FZD10, PIK3CA, CDC42, PDIA3, E2F3, PDGFC, WNT2, SHC1, WNT7A, IGF1, RHOT1, SOS1, RHOU, E2F5, PDGFRA, AKT3, RHOF, CTNNB1, MAP2K1, NRAS, PIK3C2A, GRB2, RHOC, WNT2B, PIK3C2G, PLCG1, RHOV, PLCB4,…
ERK/MAPK Signaling	0.000154882	25/204 (12%)	0/204 (0%)	54/204 (26%)	125/204 (61%)	PRKACB, YWHAH, MAPK1, BAD, PPP2CA, PIK3R1, SOS2, TLN1, CREB5, MYC, PTK2, PAK1, ITGA4, ETS1, PPP1R14C, RRAS, CRKL, RAC1, MAPKAPK5, ITGA5, PPP1R14A, RAPGEF3, RAP1A, PLA2G4C, ATF2, PIK3R3, ARAF, PPP2R3A, DUSP1, HSPB7, PAK7, DUSP4, RPS6KA1, HSPB1, PPP1CC, FYN, PIK3CA, PLA2G10, DUSP6, RAPGEF4, DUSP2, EIF4E, KSR1, ELF4, SHC1, SOS1, MKNK1, CREB1, PPP2R2C, STAT1, MAP2K1, PRKCA, PPARG, ITGB1, MYCN, PXN, N…
Aryl Hydrocarbon Receptor Signaling	0.000158489	26/155 (17%)	0/155 (0%)	35/155 (23%)	94/155 (61%)	CDKN2A, MAPK1, IL6, CCND1, ARNT, MYC, NR2F1, CTSD, RB1, NCOA7, CCNA1, TFF1, ALDH3A2, ALDH3A1, ALDH7A1, TP53, MGST1, TFDP1, MED1, GSTM3 (includes EG:2947), CDK6, ALDH8A1, NFKB2, NCOA3, ALDH3B2 (includes EG:222), CCND3, ALDH1A2, HSPB7, RXRA, MGST3, CDK2, HSPB1, IL1A, NQO2, SMARCA4, FAS, TGM2, CCNA2, GSTT1, HSP90AB1, SP1, GSTA4, NCOA2, RARB, TGFB2, GSTM4, NFE2L2, GSTA3, NFIC, NQO1, MAPK8, SLC35A2, C…
Colorectal Cancer Metastasis Signaling	0.000158489	45/259 (17%)	0/259 (0%)	54/259 (21%)	160/259 (62%)	TGFBR1, PIK3R1, SOS2, IL6, CCND1, GNB1, VEGFA, GNB4, TLR10, FIGF, WNT5B, TP53, RND2, RRAS, ADRBK2, MMP2, NFKB2, TCF3, PTGER2, PIK3CA, TCF4, LRP6, JAK2, GNG7, WNT7A, SOS1, RHOU, TLR7, TLR3, CTNNB1, MMP1 (includes EG:4312), RHOC, GRB2, PIK3C2G, MAPK8, MMP10, FOS, MSH2, ADCY1, PTGS2, JAK3, TCF7L2, FZD7, PRKACB, TLR1, JAK1, MAPK1, MMP3, BAD, DIRAS3, GNB5, MMP13, WNT16, TCF7, MYC, CASP9, RHOB, FZD2, A…
FGF Signaling	0.00020893	16/92 (17%)	0/92 (0%)	26/92 (28%)	50/92 (54%)	MAP2K6, PIK3CA, MAPK1, FGF2, PIK3R1, SOS2, MAPK13, MAP3K5 (includes EG:4217), CREB5, FGF13, FGFR3, FGF4, FGF18, HGF, FGFR4, SOS1, CREB1, AKT3, FGF3, MAP2K1, FGF19 (includes EG:9965), PRKCA, PIK3C2A, GRB2, FGFR1, CRKL, FGF14, RAC1, MAPK8, PIK3C2G, PLCG1, FGFR2, ITPR1, FGF1, ATF2, MET, PIK3R3, PTPN11, FGF20, MAP2K3, RPS6KA5, FGFRL1
Role of Osteoblasts, Osteoclasts and Chondrocytes in Rheumatoid Arthritis	0.000218776	43/243 (18%)	0/243 (0%)	49/243 (20%)	151/243 (62%)	BMP4, MAPK1, MMP3, BAD, NFATC3, PIK3R1, TAB2, CSNK1A1, WNT16, MMP13, IL6, TCF7, IL18R1, IKBKB, WIF1, CASP9, RUNX2, DKK2, TRAF5, BIRC3, SMAD1, IL1RAP, ADAMTS5, FZD2, WNT5B, TNFRSF11B, SFRP4, SPP1, SMAD9, RAC1, ITGA5, PPP3CC, TCF3, IL7, PIK3R3, IL33, IL18, BMPR1B, IL1RN, FZD3, DKK4, MAP2K3, FZD5, LEF1, MAP2K6, FZD10, TCF4, IL1A, PIK3CA, SFRP2, FRZB, MMP14, BMP2, LRP6, BMPR2, MAP3K5 (includes EG:421…
FAK Signaling	0.000239883	14/104 (13%)	0/104 (0%)	29/104 (28%)	61/104 (59%)	FYN, PIK3CA, ARHGAP26, MAPK1, ARHGEF7, HMMR, PIK3R1, SOS2, ACTA2, TLN1, PTEN, PTK2, PAK1, SOS1, AKT3, ACTG2 (includes EG:72), VCL, MAP2K1, ITGA4, ITGB1, PXN, CAPN6, NRAS, PAK2, PIK3C2A, GRB2, RRAS, ITGA2, RAC1, PIK3C2G, PLCG1, ITGA5, ITGA3, PIK3R3, RRAS2, CAPNS1, PAK3, PAK7, CAPN9, CAPN2, CAPN7, TNS1, CAPN3
Rac Signaling	0.000263027	18/124 (15%)	0/124 (0%)	31/124 (25%)	75/124 (60%)	MAPK1, PIK3R1, PIKFYVE, LIMK2, CDK5R1, ANK1, PTK2, PAK1, CYFIP2 (includes EG:26999), BAIAP2, ITGA4, RPS6KB1, ACTR2, NOX4, TIAM1, RRAS, RAC1, ITGA5, WASF1, NFKB2, PLD1, PIK3R3, PIP5K1A, ARPC2, CFL2, NCF2, PAK7, ABI2, PIK3CA, CDC42, IQGAP2, MAP2K1, PI4KA, NCKAP1, ITGB1, MAP2K7, PAK2, NRAS, PIK3C2A, ITGA2, MAPK8, PIK3C2G, C3ORF10, ITGA3, PRKCI, RRAS2, PAK3, CD44, ELK1
Hepatic Fibrosis / Hepatic Stellate Cell Activation	0.000281838	27/147 (18%)	0/147 (0%)	35/147 (24%)	85/147 (58%)	CTGF, TGFBR1, MMP13, MYH11, IL6, MYH7B (includes EG:57644), VEGFA, CXCL3, CYP2E1, LAMA1, FIGF, IL1RAP, TIMP2, TNFRSF11B, IL8, IL4R, CXCL9, MYH14, FGFR1, FGFR2, BAMBI, MMP2, IGFBP5, NFKB2, MET, CD40, IGFBP3, IFNAR1, AGTR1, COL3A1, IGFBP4, IL1A, FN1, ICAM1, FGF2, LEPR, ACTA2, CCL5, PDGFC, FAS, BCL2, COL1A2, EDN1, IGF1, TIMP1, HGF, TGFB2, PDGFRA, SMAD4, STAT1, MMP1 (includes EG:4312), VCAM1, EDNRB, …
Pancreatic Adenocarcinoma Signaling	0.000295121	18/121 (15%)	0/121 (0%)	32/121 (26%)	71/121 (59%)	CDKN2A, JAK1, TGFBR1, BAD, MAPK1, PIK3R1, CCND1, VEGFA, RB1, CASP9, CYP2E1, FIGF, TP53, PLD3, TFDP1, RAC1, HBEGF, NFKB2, PLD1, PIK3R3, BCL2L1, CDK2, NAPEPLD, PIK3CA, RALA, CDC42, PA2G4, JAK2, E2F3, PDGFC, BCL2, HMOX1, E2F5, TGFB2, SMAD4, AKT3, ERBB2, STAT1, MAP2K1, PIK3C2A, GRB2, MAPK8, PIK3C2G, CCNE1, TGFA, BRCA2, PTGS2, CDKN1B, JAK3, ELK1
Semaphorin Signaling in Neurons	0.00030903	13/52 (25%)	0/52 (0%)	15/52 (29%)	24/52 (46%)	FYN, MAPK1, DPYSL3, DIRAS3, LIMK2, PTK2, PAK1, RHOB, RHOT1, RHOU, RHOF, RND2, ITGB1, ARHGEF12, PAK2, RHOC, RAC1, RHOJ, ROCK1, MET, SEMA3A, RHOV, SEMA4D, RHOQ, PAK3, CFL2, PAK7, NRP1
Glioma Invasiveness Signaling	0.000323594	15/60 (25%)	0/60 (0%)	15/60 (25%)	30/60 (50%)	PIK3CA, MAPK1, PIK3R1, DIRAS3, HMMR, PTK2, RHOB, RHOT1, TIMP1, RHOU, ITGAV, RHOF, ITGB5, TIMP2, RND2, TIMP3, NRAS, PIK3C2A, RHOC, RRAS, PIK3C2G, PLAUR, RHOJ, MMP2, PIK3R3, RHOV, RHOQ, RRAS2, CD44, PLAU
Acute Myeloid Leukemia Signaling	0.000363078	16/85 (19%)	0/85 (0%)	23/85 (27%)	46/85 (54%)	MAP2K6, PIK3CA, TCF4, BAD, MAPK1, PIK3R1, SOS2, FLT3, CCND1, TCF7, MYC, CCNA1, SOS1, KIT, AKT3, STAT5B, MAP2K1, CSF3R, RPS6KB1, MAP2K7, NRAS, PIK3C2A, RRAS, GRB2, RAC1, PIK3C2G, TCF7L1, NFKB2, TCF3, PIK3R3, CSF2RB, RRAS2, ARAF, LEF1, MAP2K3, RUNX1, PML, MAP2K5, TCF7L2
PTEN Signaling	0.000457088	17/123 (14%)	0/123 (0%)	32/123 (26%)	74/123 (60%)	TGFBR1, BAD, MAPK1, YWHAH, PIK3R1, SOS2, CCND1, PTEN, PTK2, FGFR3, IKBKB, CASP9, FGFR4, CSNK2A1, ITGA4, RPS6KB1, RRAS, FGFR1, RAC1, FGFR2, ITGA5, NFKB2, FOXG1, DDR1, PIK3R3, BCL2L1, BMPR1B, FGFRL1, PIK3CA, CDC42, BMPR2, BCL2, SHC1, SOS1, FOXO3, PDGFRA, AKT3, MAP2K1, ITGB1, NRAS, GRB2, ITGA2, CNKSR3, ITGA3, TNFRSF11A, NTRK2, RRAS2, CDKN1B, BCL2L11
Germ Cell-Sertoli Cell Junction Signaling	0.000489779	30/168 (18%)	0/168 (0%)	38/168 (23%)	100/168 (60%)	TGFBR1, MAPK1, DIRAS3, PIK3R1, LIMK2, MAP3K4, TUBB4, PTK2, PAK1, CTNNA2, RHOB, TUBA4B, MTMR2, ACTG2 (includes EG:72), MAP3K2, RND2, PLS1, RRAS, ITGA6, RAC1, RHOJ, LAMC3, PIK3R3, CDH2, RHOQ, ZYX, MAP2K3, PAK7, CLINT1, PVRL2, EPN3, MAP2K6, PIK3CA, CDC42, PVRL3, ACTA2, CTNNA1, MAP3K5 (includes EG:4217), TUBB2B, WASL (includes EG:8976), AGGF1, SORBS1, RHOT1, PPAP2B, TGFB2, RHOU, CTNNB1, RHOF, MAP2K1,…
HMGB1 Signaling	0.000645654	18/101 (18%)	0/101 (0%)	26/101 (26%)	57/101 (56%)	MAP2K6, PIK3CA, IL1A, ICAM1, CDC42, MAPK1, PIK3R1, DIRAS3, RBBP7, MAPK13, SP1, RHOB, RHOT1, RHOU, AKT3, RHOF, SERPINE1, MAP2K1, PLAT, TNFRSF11B, RND2, IL8, VCAM1, MAP2K7, NRAS, PIK3C2A, RRAS, RHOC, MYST4, RAC1, MAPK8, PIK3C2G, RHOJ, IL1R1, NFKB2, PIK3R3, TLR4, FOS, RHOV, RRAS2, RHOQ, MAP2K3, ELK1, MAP2K5
Cholecystokinin/Gastrin-mediated Signaling	0.000776247	19/106 (18%)	0/106 (0%)	27/106 (25%)	60/106 (57%)	MAP2K6, IL1A, CREM, MAPK1, DIRAS3, SOS2, EPHA4, PTK2, SHC1, RHOB, RHOT1, SOS1, RHOU, SST, GNA13, RHOF, MAP2K1, PRKCA, RND2, PXN, NRAS, RHOC, RRAS, GRB2, ITPR2, MAPK8, MEF2A (includes EG:4205), RHOJ, ITPR1, ATF2, ROCK1, IL33, FOS, RHOV, PLCB4, IL18, PRKCI, RRAS2, RHOQ, IL1RN, ITPR3, IL1B, MAP2K3, PTGS2, ELK1, MAP2K5
Endometrial Cancer Signaling	0.00102329	11/60 (18%)	0/60 (0%)	17/60 (28%)	32/60 (53%)	PIK3CA, MAPK1, BAD, PIK3R1, SOS2, CTNNA1, CCND1, PTEN, MYC, CTNNA2, CASP9, FOXO3, SOS1, AKT3, ERBB2, CTNNB1, MAP2K1, TP53, NRAS, PIK3C2A, RRAS, GRB2, RAC1, PIK3C2G, PIK3R3, RRAS2, LEF1, ELK1
Prolactin Signaling	0.00104713	13/80 (16%)	0/80 (0%)	22/80 (28%)	45/80 (56%)	SOCS3, FYN, PIK3CA, MAPK1, PIK3R1, SOCS6, SOS2, SOCS2, JAK2, NR3C1, TCF7, MYC, SHC1, SP1, SOS1, PRLR, STAT1, STAT5B, MAP2K1, PRKCA, NRAS, PIK3C2A, RRAS, GRB2, PIK3C2G, PLCG1, SOCS4, CEBPB, PIK3R3, FOS, RRAS2, PRKCI, PTPN11, IRS1, SOCS7
VEGF Signaling	0.00144544	17/102 (17%)	0/102 (0%)	24/102 (24%)	61/102 (60%)	EIF2S2, PIK3CA, BAD, MAPK1, PIK3R1, SOS2, ACTA2, EIF1, EIF2S1, EIF2B2, PDGFC, ELAVL1, ARNT, BCL2, PTK2, VEGFA, SHC1, EIF1AX, FOXO3, SOS1, FIGF, AKT3, ACTG2 (includes EG:72), VCL, MAP2K1, PRKCA, PXN, NRAS, YWHAE, PIK3C2A, GRB2, RRAS, RAC1, PIK3C2G, EIF2B3, PLCG1, ROCK1, PIK3R3, BCL2L1, RRAS2, SFN
Lysine Biosynthesis	0.00177828	4/66 (6%)	0/66 (0%)	5/66 (8%)	57/66 (86%)	AASDH, AASDHPPT, AADAT, VNN1, VNN2, ALAS1, AGXT2L2 (includes EG:85007), VNN3, TAP2
PI3K/AKT Signaling	0.00186209	17/142 (12%)	0/142 (0%)	35/142 (25%)	90/142 (63%)	GAB2, JAK1, BAD, MAPK1, YWHAH, PPP2CA, PIK3R1, SOS2, LIMS1, CCND1, PTEN, IKBKB, MCL1, ITGA4, TP53, RPS6KB1, YWHAE, RRAS, RAC1, ITGA5, NFKB2, MAPK8IP1, PIK3R3, BCL2L1, PPP2R3A, PIK3CA, MAP3K5 (includes EG:4217), JAK2, EIF4E, BCL2, SHC1, NFKBIA, HSP90AB1, SOS1, FOXO3, HLA-B, AKT3, PPP2R2C, CTNNB1, MAP2K1, ITGB1, NRAS, GRB2, ITGA2, ITGA3, PPP2R5A, RRAS2, PTGS2, CDKN1B, JAK3, SFN, PPP2R1B
Neuregulin Signaling	0.00190546	10/105 (10%)	0/105 (0%)	31/105 (30%)	64/105 (61%)	NRG2, BAD, MAPK1, BTC, PIK3R1, SOS2, CDK5R1, PTEN, MYC, SHC1, HSP90AB1, ERBB4, SOS1, GRB7, AKT3, ERRFI1, ERBB2, STAT5B, MAP2K1, ITGA4, PRKCA, ITGB1, RPS6KB1, NRAS, GRB2, RRAS, CRKL, DCN, ITGA2, RAC1, PLCG1, ITGA5, HBEGF, ITGA3, PIK3R3, PRKCI, RRAS2, PTPN11, TGFA, CDKN1B, ELK1
Neurotrophin/TRK Signaling	0.00204174	12/78 (15%)	0/78 (0%)	21/78 (27%)	45/78 (58%)	MAP2K6, PIK3CA, CDC42, MAPK1, BDNF, PIK3R1, SOS2, MAP3K5 (includes EG:4217), CREB5, SHC1, SOS1, CREB1, MAP2K1, MAP2K7, NRAS, PIK3C2A, SPRY1, RRAS, GRB2, PIK3C2G, MAPK8, PLCG1, ATF2, PIK3R3, FOS, RRAS2, NTRK2, PTPN11, SPRY2, KLK2, MAP2K3, RPS6KA1, MAP2K5
Acute Phase Response Signaling	0.00204174	27/183 (15%)	0/183 (0%)	43/183 (23%)	113/183 (62%)	SOCS3, MAPK1, PIK3R1, SOS2, SOCS6, CP, IL6, MAPK13, RBP1, ORM1, IKBKB, SOD2, ITIH2, OSMR, SERPINE1, IL1RAP, TNFRSF11B, C3, RRAS, RAC1, NFKB2, TCF3, CRABP1, IL33, PIK3R3, IL18, PTPN11, C4BPA, IL1RN, MAP2K3, C2, IL6ST, MAP2K6, TCF4, PIK3CA, SERPING1, IL1A, FN1, APOA1, SOCS2, AMBP, MAP3K5 (includes EG:4217), JAK2, NR3C1, HMOX1, SHC1, NFKBIA, F8, SOS1, CFB, AKT3, SERPINA1, MAP2K1, MAP2K7, NRAS, GRB2,…
Ephrin Receptor Signaling	0.00204174	23/199 (12%)	0/199 (0%)	47/199 (24%)	129/199 (65%)	MAPK1, EPHB2, SOS2, GNB5, LIMK2, CREB5, GNB1, PTK2, VEGFA, GNB4, PAK1, EPHB1, GNA15, FIGF, GNA13, ITGA4, EPHA7, ACTR2, RRAS, CRKL, RAC1, ITGA5, RAP1A, ATF2, PTPN11, CFL2, ARPC2, ACP1, PAK7, PDGFD, EPHA2, FYN, CDC42, PTPN13, EPHA4, GNA14, JAK2, PDGFC, GNG7, EFNB2, SHC1, WASL (includes EG:8976), SORBS1, SDC2, CREB1, SOS1, AKT3, MAP2K1, ITGB1, PXN, NRAS, PAK2, ANGPT1, CXCR4, GRB2, ITGA2, GNAI1, PIK3…
GM-CSF Signaling	0.00218776	10/70 (14%)	0/70 (0%)	21/70 (30%)	39/70 (56%)	PIK3CA, MAPK1, PIK3R1, SOS2, JAK2, CCND1, SHC1, CAMK2D, PPP3CB, SOS1, AKT3, STAT5B, STAT1, MAP2K1, ETS1, NRAS, PIK3C2A, RRAS, GRB2, RAC1, PIK3C2G, PPP3CC, PIK3R3, CSF2RB, BCL2L1, RRAS2, PTPN11, LYN, RUNX1, ELK1, BCL2A1
Bladder Cancer Signaling	0.00223872	9/92 (10%)	0/92 (0%)	31/92 (34%)	52/92 (57%)	CDKN2A, MMP7, MMP3, MAPK1, PA2G4, FGF2, MMP14, MMP13, CCND1, PDGFC, FGF13, VEGFA, MYC, FGFR3, RB1, FGF4, FGF18, MMP26, FIGF, MMP11, ERBB2, FGF3, MAP2K1, MMP1 (includes EG:4312), MMP19, FGF19 (includes EG:9965), TP53, IL8, DAPK1, NRAS, TFDP1, THBS1, RRAS, FGF14, MMP10, MMP2, FGF1, RRAS2, FGF20, RPS6KA5
Agrin Interactions at Neuromuscular Junction	0.00245471	9/69 (13%)	0/69 (0%)	23/69 (33%)	37/69 (54%)	CHRNA1, NRG2, CDC42, MAPK1, ARHGEF7, ACTA2, PTK2, PAK1, ERBB4, UTRN, LAMB1, ACTG2 (includes EG:72), ERBB2, ITGA4, ITGB1, PXN, PAK2, NRAS, RRAS, LAMA2, ITGA2, MAPK8, RAC1, ITGA6, ITGA5, ITGA3, RRAS2, PAK3, GABPA, PAK7, AGRN, CTTN
Apoptosis Signaling	0.00251189	9/90 (10%)	0/90 (0%)	29/90 (32%)	52/90 (58%)	GAS2, BAD, MAPK1, MAP3K5 (includes EG:4217), FAS, BCL2, CASP6, IKBKB, CASP9, NFKBIA, CASP8, BIRC3, MAP2K1, CASP10, AIFM1, PRKCA, TP53, ENDOG, CAPN6, MAP2K7, NRAS, RRAS, MAPK8, PLCG1, NFKB2, ROCK1, BCL2L1, RRAS2, CAPNS1, CASP2, DFFB, CAPN9, CAPN2, CAPN7, RPS6KA1, DIABLO, BCL2A1, CAPN3
Axonal Guidance Signaling	0.0025704	53/410 (13%)	0/410 (0%)	84/410 (20%)	273/410 (67%)	SHH, BMP4, PIK3R1, SOS2, NTN1, ADAM8, VEGFA, GNB1, GNB4, EPHB1, PAK1, GNA15, BAIAP2, FIGF, GNA13, WNT5B, ITGA4, ACTR2, RRAS, SEMA5A, CRKL, ITGA5, L1CAM, RAP1A, SRGAP3, ARPC2, KLK2, RTN4, PAK7, PDGFD, EPHA2, NRP1, FYN, PIK3CA, PLXNA3, UNC5A, CDC42, BDNF, ARHGEF7, SEMA6A, EPHA4, GNA14, GNG7, EIF4E, EFNB2, WNT7A, IGF1, SOS1, ADAM19, RASSF5, ROBO2, UNC5C, GLIS1, ITGB1, PAK2, NRP2, GRB2, ITGA2, PIK3C2…
Neuroprotective Role of THOP1 in Alzheimer's Disease	0.00263027	11/54 (20%)	0/54 (0%)	10/54 (19%)	33/54 (61%)	MME, PRKACB, YWHAE, NTS, TAC1, APP, HLA-F, PRKAR2B, HLA-A, NFYA, HLA-E, CREB1, GNRH1, HLA-B, PRKAG2, SST, PNOC, HLA-G, ACE, PRKAR1A, HLA-C
Thyroid Cancer Signaling	0.00263027	12/47 (26%)	0/47 (0%)	11/47 (23%)	24/47 (51%)	TP53, PPARG, TCF4, NRAS, MAPK1, BDNF, RRAS, CXCL1, TCF7L1, TCF3, CCND1, TCF7, CXCL10, MYC, SHC1, NTRK2, RRAS2, KLK2, LEF1, RXRA, CTNNB1, MAP2K1, TCF7L2
PDGF Signaling	0.00275423	9/79 (11%)	0/79 (0%)	24/79 (30%)	46/79 (58%)	PIK3CA, JAK1, MAPK1, PIK3R1, SOS2, JAK2, PDGFC, MYC, SHC1, SOS1, CAV1, PDGFRA, CSNK2A1, SPHK1, STAT1, MAP2K1, PRKCA, NRAS, PIK3C2A, RRAS, GRB2, CRKL, PIK3C2G, MAPK8, PLCG1, PIK3R3, FOS, RRAS2, ABL2, ACP1, PDGFD, ELK1, JAK3
Type I Diabetes Mellitus Signaling	0.00281838	27/121 (22%)	0/121 (0%)	20/121 (17%)	74/121 (61%)	MAP2K6, SOCS3, HLA-DOA, JAK1, TRD@, MAPK1, SOCS6, SOCS2, HLA-DQA1, HLA-DRB1, HLA-DMB, MAP3K5 (includes EG:4217), JAK2, MAPK13, FAS, HLA-F, BCL2, IKBKB, NFKBIA, CASP9, HLA-A, HLA-DRA, HLA-B, MYO5B, CASP8, HLA-G, STAT1, IL1RAP, HLA-C, TNFRSF11B, HLA-DMA, MAP2K7, MAPK8, SOCS4, IL1R1, NFKB2, HSPD1, HLA-DQB1, FADD, HLA-E, GAD1, IL1B, MAP2K3, SOCS7, CPE, TRA@, GZMB
Atherosclerosis Signaling	0.00295121	13/115 (11%)	0/115 (0%)	31/115 (27%)	71/115 (62%)	IL1A, ICAM1, MMP3, PLA2G10, PLA2R1, MMP13, IL6, PDGFC, WISP2, TNFRSF12A, COL1A2, ILDR1, LPL, COL10A1, COL18A1, MMP1 (includes EG:4312), ITGA4, IL8, ALOX15, VCAM1, PLA2G12A, PNPLA3, CXCR4, CD36, COL2A1, NFKB2, CCL11, F3, TPSAB1, PLA2G4C, IL33, COL1A1, PLA2G4A, COL5A3, IL18, ALOX15B, CD40, IL1RN, CXCL12, IL1B, ALOX5, PDGFD, TNFSF14, COL3A1
Glutamate Metabolism	0.00316228	7/78 (9%)	0/78 (0%)	13/78 (17%)	58/78 (74%)	FMO3, GFPT1, NAGK, SUCLG2, ABAT, GLS, GLUD1, LGSN, GPT2, TGM4, EPRS, GFPT2, GNPNAT1, GAD1, GLUL, MYO5B, GCLM, CPS1, GLUD2, PPAT
Antiproliferative Role of TOB in T Cell Signaling	0.00323594	3/26 (12%)	0/26 (0%)	12/26 (46%)	11/26 (42%)	TGFBR1, MAPK1, TOB1, TWSG1, SKP2, CCNA2, RB1, CCNE1, CCNA1, PABPC4, TGFB2, SMAD4, RPS6KA1, CDKN1B, CDK2
Ovarian Cancer Signaling	0.00338844	20/145 (14%)	0/145 (0%)	36/145 (25%)	89/145 (61%)	CDKN2A, PRKACB, MAPK1, PIK3R1, WNT16, CCND1, TCF7, PTEN, VEGFA, RB1, FIGF, FZD2, WNT5B, TP53, RPS6KB1, TFDP1, RRAS, RAC1, MMP2, TCF3, PIK3R3, FZD3, FZD5, LEF1, FZD10, PIK3CA, MMP7, TCF4, PA2G4, PDGFC, WNT2, BCL2, WNT7A, EDN1, AKT3, CTNNB1, MAP2K1, NRAS, PIK3C2A, WNT2B, PTGS1, PIK3C2G, TCF7L1, FZD4, PRKAR2B, RRAS2, MSH2, WNT10A, MSH6, CD44, PRKAG2, BRCA2, PTGS2, TCF7L2, PRKAR1A, FZD7
Role of BRCA1 in DNA Damage Response	0.00338844	15/61 (25%)	0/61 (0%)	12/61 (20%)	34/61 (56%)	BARD1, FANCF, MRE11A, E2F3, SMARCA4, RB1, GADD45A, FANCD2, E2F5, SLC19A1, BLM, BRIP1, STAT1, TP53, RBL2, ATF1, PLK1, RPA1, FANCC, POU2F1, FANCM, MSH2, SMARCA2, MSH6, BRCA2, FANCA, RFC3
Graft-versus-Host Disease Signaling	0.00371535	16/50 (32%)	0/50 (0%)	7/50 (14%)	27/50 (54%)	HLA-DMA, HLA-DOA, IL1A, TRD@, HLA-DQA1, HLA-DRB1, HLA-DMB, IL6, FAS, HLA-F, IL33, HLA-DQB1, IL18, HLA-A, IL1RN, HLA-E, HLA-DRA, HLA-B, IL1B, HLA-G, TRA@, HLA-C, GZMB
EGF Signaling	0.00371535	9/52 (17%)	0/52 (0%)	14/52 (27%)	29/52 (56%)	PIK3CA, MAP2K7, JAK1, PIK3C2A, MAPK1, ITPR2, GRB2, PIK3R1, SOS2, PIK3C2G, MAPK8, PLCG1, ITPR1, PIK3R3, SHC1, FOS, SOS1, ITPR3, CSNK2A1, STAT1, ELK1, MAP2K1, PRKCA
IL-17 Signaling	0.00389045	11/77 (14%)	0/77 (0%)	23/77 (30%)	43/77 (56%)	MAP2K6, PIK3CA, JAK1, MMP3, MAPK1, PIK3R1, CXCL1, JAK2, MAPK13, CXCL5, IL6, MUC5B, CXCL10, TRAF3IP2, TIMP1, AKT3, MAP2K1, CXCL11, DEFB4A, IL8, NRAS, PIK3C2A, RRAS, RAC1, PIK3C2G, MAPK8, CEBPB, CCL11, ATF2, PIK3R3, RRAS2, MAP2K3, PTGS2, ELK1
Chronic Myeloid Leukemia Signaling	0.00416869	14/108 (13%)	0/108 (0%)	28/108 (26%)	66/108 (61%)	CDKN2A, GAB2, PIK3CA, TGFBR1, BAD, MAPK1, PA2G4, PIK3R1, SOS2, E2F3, CCND1, MYC, RB1, IKBKB, CTBP2, SOS1, TGFB2, E2F5, AKT3, SMAD4, STAT5B, MAP2K1, TP53, RBL2, NRAS, HDAC4, TFDP1, PIK3C2A, GRB2, RRAS, CRKL, HDAC1, RAC1, CDK6, PIK3C2G, NFKB2, MECOM, PIK3R3, BCL2L1, RRAS2, PTPN11, CDKN1B
VDR/RXR Activation	0.0042658	15/81 (19%)	0/81 (0%)	20/81 (25%)	46/81 (57%)	SERPINB1, CYP24A1, KLK6, HES1, CCL5, CXCL10, SP1, NCOA2, GADD45A, RUNX2, MXD1, HOXA10, TGFB2, CSNK2A1, SEMA3B, VDR, CALB1, PRKCA, DEFB4A, WT1, TNFSF11, SPP1, MED1, IGFBP5, CEBPB, KLF4, NCOA3, PRKCI, COL13A1, CYP27B1, IGFBP3, NCOA1, CDKN1B, RXRA, CST6
TR/RXR Activation	0.00436516	16/100 (16%)	0/100 (0%)	23/100 (23%)	61/100 (61%)	PIK3CA, RAB3B, AKR1C3, PIK3R1, RCAN2, ME1, DIO2, NRGN, SLC16A3, ADRB1, SCARB1, NCOA2, PDE3B, FASN, AKT3, NCOA4, TBL1XR1, UCP2, AKR1C1, PIK3C2A, SLC2A1, GPS2, MED1, PIK3C2G, RAC1, BCL3, PFKP, PCK1, AKR1C2, NCOA3, PIK3R3, LDLR, COL6A3, SREBF1, ENO1, NCOA1, STRBP, RXRA, PPARGC1A
B Cell Receptor Signaling	0.00446684	16/157 (10%)	0/157 (0%)	43/157 (27%)	98/157 (62%)	GAB2, FCGR2C, MAPK1, BAD, NFATC3, PIK3R1, SOS2, MAPK13, MAP3K4, CREB5, PTEN, IKBKB, CAMK2D, MAP3K2, ETS1, RPS6KB1, RRAS, RAC1, NFKB2, PPP3CC, MALT1, ATF2, PIK3R3, BCL2L1, PTPN11, SYK, PIK3AP1, VAV1, MAP2K3, BCL2A1, MAP2K6, PIK3CA, CDC42, MAP3K5 (includes EG:4217), FCGR2B, SHC1, NFKBIA, PPP3CB, CARD10, CREB1, SOS1, AKT3, MAP2K1, VAV2, MAP2K7, NRAS, PIK3C2A, GRB2, FCGR2A, EGR1, PIK3C2G, MAPK8, RRAS…
Prostate Cancer Signaling	0.00489779	12/100 (12%)	0/100 (0%)	25/100 (25%)	63/100 (63%)	PIK3CA, BAD, MAPK1, PA2G4, SRD5A1, PIK3R1, SOS2, CREB5, CCND1, BCL2, PTEN, RB1, NFKBIA, AR, CASP9, HSP90AB1, CREB1, SOS1, AKT3, CTNNB1, MAP2K1, TP53, NRAS, PIK3C2A, TFDP1, GRB2, RRAS, PIK3C2G, RAC1, NFKB2, ATF2, PIK3R3, CCNE1, RRAS2, LEF1, CDKN1B, CDK2
Angiopoietin Signaling	0.00524807	12/77 (16%)	0/77 (0%)	19/77 (25%)	46/77 (60%)	ANGPT2, PIK3CA, GRB14, BAD, PIK3R1, PTK2, IKBKB, TNIP1, PAK1, CASP9, NFKBIA, SOS1, GRB7, AKT3, STAT5B, TEK, PAK2, NRAS, PIK3C2A, ANGPT1, RRAS, GRB2, PIK3C2G, RAC1, NFKB2, ANGPTL1, PIK3R3, RRAS2, PTPN11, PAK3, PAK7
Role of NANOG in Mammalian Embryonic Stem Cell Pluripotency	0.00524807	18/117 (15%)	0/117 (0%)	29/117 (25%)	70/117 (60%)	FZD10, PIK3CA, BMP4, JAK1, LIF, MAPK1, PIK3R1, BMP2, SOS2, BMPR2, WNT16, JAK2, WNT2, LIFR, SOX2, SHC1, WNT7A, SOS1, GATA6, AKT3, SMAD4, CTNNB1, FZD2, MAP2K1, SMAD1, WNT5B, TP53, NRAS, SMAD9, PIK3C2A, GRB2, RRAS, WNT2B, RAC1, PIK3C2G, TCF7L1, BMP5, PIK3R3, BMPR1B, RRAS2, FZD4, WNT10A, FZD3, FZD5, JAK3, FZD7, SALL4
HGF Signaling	0.00549541	13/107 (12%)	0/107 (0%)	30/107 (28%)	64/107 (60%)	CDKN2A, PIK3CA, CDC42, MAPK1, PIK3R1, SOS2, MAP3K5 (includes EG:4217), MAP3K4, IL6, CCND1, PTK2, ELF4, PAK1, HGF, SOS1, AKT3, MAP2K1, PRKCA, MAP3K2, ETS1, PXN, MAP2K7, NRAS, PIK3C2A, GRB2, RRAS, CRKL, RAC1, MAPK8, PIK3C2G, PLCG1, RAP1A, ATF2, MET, PIK3R3, FOS, ELF2, PRKCI, RRAS2, PTPN11, PTGS2, ELK1, CDK2
Renin-Angiotensin Signaling	0.00588844	18/124 (15%)	0/124 (0%)	27/124 (22%)	79/124 (64%)	PRKACB, PIK3CA, MAPK1, PIK3R1, SOS2, MAPK13, JAK2, CCL5, PTK2, SHC1, PAK1, SOS1, STAT1, MAP2K1, ACE, PRKCA, ADCY9, PAK2, NRAS, PIK3C2A, RRAS, GRB2, ITPR2, RAC1, REN, PIK3C2G, MAPK8, PLCG1, NFKB2, ITPR1, ATF2, PIK3R3, FOS, PRKCI, PRKAR2B, RRAS2, PAK3, ADCY1, ITPR3, PRKAG2, PAK7, PTGER2, ELK1, AGTR1, PRKAR1A
Small Cell Lung Cancer Signaling	0.0060256	15/92 (16%)	0/92 (0%)	18/92 (20%)	59/92 (64%)	TRAF3, PIK3CA, PA2G4, PIK3R1, CCND1, PTEN, BCL2, PTK2, MYC, RB1, IKBKB, CASP9, NFKBIA, RARB, AKT3, TRAF5, TP53, FHIT, PIK3C2A, TFDP1, RAC1, CDK6, PIK3C2G, NFKB2, SKP2, PIK3R3, PIAS3, BCL2L1, CCNE1, PTGS2, CDKN1B, RXRA, CDK2
IL-8 Signaling	0.00630957	29/193 (15%)	0/193 (0%)	39/193 (20%)	125/193 (65%)	MAPK1, DIRAS3, PIK3R1, GNB5, CXCL1, LIMK2, CCND1, GNB1, PTK2, VEGFA, GNB4, IKBKB, RHOB, FIGF, GNA13, TEK, RND2, RPS6KB1, IL8, NOX4, PLD3, RRAS, RAC1, HBEGF, RHOJ, MMP2, PLD1, PIK3R3, BCL2L1, RHOQ, CCND3, ITGAM, ARAF, NCF2, PIK3CA, NAPEPLD, ANGPT2, ICAM1, PDGFC, GNG7, BCL2, HMOX1, CXCR2, RHOT1, RHOU, AKT3, RHOF, MAP2K1, PRKCA, VCAM1, NRAS, PAK2, ANGPT1, PIK3C2A, RHOC, GNAI1, MAPK8, PIK3C2G, IRAK3,…
TGF-β Signaling	0.00645654	15/83 (18%)	0/83 (0%)	19/83 (23%)	49/83 (59%)	BMP4, TGFBR1, MAPK1, BMP2, SOS2, BMPR2, ACVR2B, TGIF1, RUNX2, SOS1, TGFB2, SMAD4, VDR, SERPINE1, MAP2K1, SMAD1, ACVR1C, NRAS, SMAD9, RRAS, GRB2, HOXC9, HDAC1, SMAD7, MAPK8, PITX2, ZNF423, NKX2-5, FOS, BMPR1B, RRAS2, AMH, SMURF2, ACVR2A
Wnt/β-catenin Signaling	0.00724436	37/175 (21%)	0/175 (0%)	30/175 (17%)	108/175 (62%)	CDKN2A, TGFBR1, PPP2CA, SOX12, CSNK1A1, WNT16, TLE1, SOX13, CCND1, TCF7, MYC, SOX2, WIF1, CSNK2A1, DKK2, FZD2, WNT5B, SOX4, TP53, SFRP4, AXIN2, RAC1, TCF3, CDH2, CDH12, CDH5, PPP2R3A, TLE3, FZD3, DKK4, FZD5, LEF1, FZD10, TCF4, MMP7, SFRP2, FRZB, LRP6, ACVR2B, KREMEN1, WNT2, CSNK1E, SOX17, SOX9, WNT7A, RARB, TGFB2, AKT3, PPP2R2C, CTNNB1, ACVR1C, WNT2B, HDAC1, TCF7L1, SOX11, PPP2R5A, FZD4, WNT10A, …
Nitrogen Metabolism	0.00724436	7/133 (5%)	0/133 (0%)	16/133 (12%)	110/133 (83%)	CA2, CA10, PTPRG, CA4, GLS, CA12, GLUD1, PDPR, TGM4, ADAR, LGSN, VNN3, CA8, CA9, HAL, VNN1, VNN2, GLUL, ALAS1, AGXT2L2 (includes EG:85007), CTH, CPS1, GLUD2
IL-2 Signaling	0.00758578	9/61 (15%)	0/61 (0%)	17/61 (28%)	35/61 (57%)	PIK3CA, JAK1, MAPK1, PIK3R1, SOS2, SHC1, LCK, SOS1, CSNK2A1, AKT3, STAT5B, MAP2K1, NRAS, PIK3C2A, RRAS, GRB2, MAPK8, RAC1, PIK3C2G, PIK3R3, FOS, RRAS2, PTPN11, SYK, JAK3, ELK1
FLT3 Signaling in Hematopoietic Progenitor Cells	0.00776247	10/77 (13%)	0/77 (0%)	23/77 (30%)	44/77 (57%)	GAB2, PIK3CA, BAD, MAPK1, PIK3R1, SOS2, FLT3, RPS6KA3, MAPK13, CREB5, EIF4E, SHC1, CREB1, SOS1, AKT3, STAT1, STAT5B, MAP2K1, RPS6KB1, NRAS, PIK3C2A, RRAS, GRB2, RAC1, PIK3C2G, ATF2, PIK3R3, RPS6KA6, RRAS2, PTPN11, RPS6KA5, RPS6KA1, ELK1
Nicotinate and Nicotinamide Metabolism	0.00794328	17/136 (13%)	0/136 (0%)	25/136 (18%)	94/136 (69%)	MAP2K6, MAPK1, NUDT12, CSNK1A1, LIMK2, VNN3, NNMT, NAPRT1, PRKX, PAK1, CDK8, VNN1, VNN2, ENTPD3, PRKAA1, PRKAA2, ENPP2, NAMPT, MAP2K1, GRK4, DAPK1, PAK2, CDK6, MAPK8, ENPP5, PLK1, NT5C, ENPP3, NNT, ARAF, PAK3, NT5E, DFFB, CILP, CILP2, PAK7, MAP2K3, AOX1, NADK (includes EG:65220), NMNAT3 (includes EG:349565), ACVR2A, CDK2
Myc Mediated Apoptosis Signaling	0.00891251	10/64 (16%)	0/64 (0%)	18/64 (28%)	36/64 (56%)	CDKN2A, PIK3CA, YWHAH, BAD, PIK3R1, SOS2, FAS, BCL2, MYC, SHC1, CASP9, IGF1, SOS1, AKT3, CASP8, TP53, NRAS, PIK3C2A, YWHAE, RRAS, GRB2, RAC1, MAPK8, PIK3C2G, FADD, PIK3R3, RRAS2, SFN
Amyloid Processing	0.00912011	11/59 (19%)	0/59 (0%)	14/59 (24%)	34/59 (58%)	PRKACB, MAPK1, APH1B, CSNK1A1, MARK1, NCSTN, PSEN2, MAPK13, APP, CDK5R1, CSNK1E, CSNK2A1, AKT3, CAPN6, RAC1, BACE1, PRKAR2B, CAPNS1, PRKAG2, CAPN9, CAPN2, BACE2, CAPN7, CAPN3, PRKAR1A
T Cell Receptor Signaling	0.00933254	13/110 (12%)	0/110 (0%)	28/110 (25%)	69/110 (63%)	FYN, PIK3CA, MAPK1, NFATC3, PIK3R1, SOS2, IKBKB, LCK, TXK, NFKBIA, PPP3CB, SOS1, MAP2K1, ITK, VAV2, PTPN7, NRAS, PIK3C2A, RRAS, GRB2, PIK3C2G, MAPK8, RAC1, PLCG1, BMX, PPP3CC, MALT1, NFKB2, PIK3R3, SHB, FOS, PTPRH, RRAS2, BCL10, VAV3, PAG1, RASGRP1, VAV1, ELK1, LCP2, TRA@
Human Embryonic Stem Cell Pluripotency	0.00933254	28/157 (18%)	0/157 (0%)	26/157 (17%)	103/157 (66%)	BMP4, TGFBR1, PIK3R1, WNT16, TCF7, FGFR3, SOX2, FGFR4, SMAD1, FZD2, WNT5B, FGFR1, RAC1, FGFR2, TCF3, PIK3R3, BMPR1B, KLK2, FZD3, FZD5, LEF1, FGFRL1, PDGFD, FZD10, PIK3CA, TCF4, BDNF, FGF2, BMP2, BMPR2, PDGFC, LEFTY2, WNT2, FGF4, WNT7A, TGFB2, PDGFRA, SPHK1, AKT3, SMAD4, CTNNB1, S1PR2, PIK3C2A, WNT2B, SMAD7, PIK3C2G, TCF7L1, BMP5, GNAS, NTRK2, FZD4, WNT10A, TCF7L2, FZD7
JAK/Stat Signaling	0.00954993	10/68 (15%)	0/68 (0%)	19/68 (28%)	39/68 (57%)	SOCS3, PIK3CA, JAK1, PIAS2, MAPK1, PIK3R1, SOS2, SOCS6, SOCS2, JAK2, SHC1, SOS1, AKT3, STAT5B, STAT1, MAP2K1, NRAS, PIK3C2A, RRAS, GRB2, RAC1, PIK3C2G, SOCS4, PIK3R3, PIAS3, RRAS2, PTPN11, SOCS7, JAK3
HER-2 Signaling in Breast Cancer	0.0102329	10/83 (12%)	0/83 (0%)	24/83 (29%)	49/83 (59%)	PIK3CA, BAD, CDC42, PIK3R1, SOS2, PARD6B, PARD6G, MAP3K5 (includes EG:4217), ITGB8, CCND1, CASP9, SOS1, AKT3, ERBB2, ITGB4, ITGB5, PRKCA, TP53, ITGB1, NRAS, PIK3C2A, RRAS, GRB2, CDK6, PIK3C2G, RAC1, PLCG1, MMP2, PIK3R3, CCNE1, RRAS2, PRKCI, CDKN1B, ITGB6
Fcγ Receptor-mediated Phagocytosis in Macrophages and Monocytes	0.0104713	14/102 (14%)	0/102 (0%)	25/102 (25%)	63/102 (62%)	FYN, GAB2, NAPEPLD, CDC42, MAPK1, PIK3R1, ACTA2, TLN1, FCGR1A, PTEN, HMOX1, PAK1, RAB11B, EZR, VAMP3, AKT3, ACTG2 (includes EG:72), FGR, PRKCA, VAV2, ACTR2, RPS6KB1, PXN, PLD3, FCGR2A, RAC1, PIK3C2G, PLCG1, PLD1, PIK3R3, PIP5K1A, PRKCI, SYK, ARPC2, VAV3, LYN, RAB11A, VAV1, LCP2
Renal Cell Carcinoma Signaling	0.0109648	8/75 (11%)	0/75 (0%)	23/75 (31%)	44/75 (59%)	PIK3CA, CDC42, MAPK1, PIK3R1, SOS2, ARNT, VEGFA, PAK1, HGF, SOS1, AKT3, MAP2K1, ETS1, PAK2, NRAS, PIK3C2A, SLC2A1, RRAS, GRB2, RAC1, PIK3C2G, RAP1A, MET, PIK3R3, FOS, RRAS2, PTPN11, PAK3, TGFA, PAK7, FH
IL-4 Signaling	0.0109648	13/76 (17%)	0/76 (0%)	18/76 (24%)	45/76 (59%)	PIK3CA, HLA-DOA, JAK1, NFATC3, PIK3R1, SOS2, HLA-DQA1, HLA-DRB1, HLA-DMB, JAK2, NR3C1, SHC1, HLA-DRA, SOS1, AKT3, HLA-DMA, RPS6KB1, IL4R, NRAS, PIK3C2A, IL13RA1, RRAS, GRB2, PIK3C2G, HMGA1, RAC1, PIK3R3, HLA-DQB1, RRAS2, IRS1, JAK3
Tumoricidal Function of Hepatic Natural Killer Cells	0.0120226	2/24 (8%)	0/24 (0%)	11/24 (46%)	11/24 (46%)	ENDOG, M6PR, ICAM1, FAS, FADD, CASP6, SERPINB9, CASP9, SRGN, DFFB, CASP8, GZMB, AIFM1
Regulation of eIF4 and p70S6K Signaling	0.0123027	15/135 (11%)	0/135 (0%)	29/135 (21%)	91/135 (67%)	EIF2S2, PIK3CA, MAPK1, PPP2CA, PIK3R1, SOS2, EIF1, MAPK13, EIF2S1, EIF2B2, EIF4E, SHC1, EIF2C4, EIF3B, EIF1AX, SOS1, MKNK1, PAIP1, AKT3, PPP2R2C, MAP2K1, ITGA4, ITGB1, RPS6KB1, NRAS, PIK3C2A, EIF3F, RRAS, GRB2, ITGA2, RAC1, PIK3C2G, EIF4G3, ITGA5, EIF2B3, ITGA3, PPP2R5A, PIK3R3, RRAS2, PPP2R3A, EIF4A3 (includes EG:9775), IRS1, EIF4A1, PPP2R1B
Dendritic Cell Maturation	0.0125893	23/191 (12%)	0/191 (0%)	40/191 (21%)	128/191 (67%)	FCGR2C, HLA-DOA, MAPK1, TRD@, PIK3R1, HLA-DRB1, LTB, HLA-DMB, IL6, MAPK13, CREB5, FCGR1A, IKBKB, COL10A1, HLA-C, TNFRSF11B, RAC1, COL2A1, NFKB2, DDR1, ATF2, PIK3R3, HLA-DQB1, IL33, IL18, HLA-DRB4, CD40, IL1RN, FSCN1, IFNAR1, TRA@, COL3A1, FCGR3B, PIK3CA, IL1A, ICAM1, LEPR, HLA-DQA1, IGHG1, JAK2, FCGR2B, COL1A2, NFKBIA, HLA-A, HLA-DRA, CREB1, HLA-B, AKT3, TLR3, STAT1, COL18A1, FCGR1B, HLA-DMA, PIK…
Glucocorticoid Receptor Signaling	0.0125893	38/284 (13%)	0/284 (0%)	56/284 (20%)	190/284 (67%)	PRKACB, TAF4B, TGFBR1, JAK1, YWHAH, MAPK1, HSPA14, NFATC3, PIK3R1, SOS2, PBX1, IL6, MAPK13, CD163, FCGR1A, PGR, HSPA4, IKBKB, CXCL3, BAG1, CDKN1C, SERPINE1, IL8, MED1, RRAS, RAC1, POLR2J2, PPP3CC, PCK1, ERCC2, MED14, NCOA3, TAF9B, PIK3R3, BCL2L1, POU2F1, SMARCA2, IL1RN, DUSP1, NCOA1, TRA@, POLR2K, PIK3CA, ICAM1, POLR2J, GTF2H2, CCL5, JAK2, SLPI, NR3C1, SMARCA4, BCL2, SHC1, TSC22D3, POLR2L (includ…
IL-6 Signaling	0.0128825	11/100 (11%)	0/100 (0%)	28/100 (28%)	61/100 (61%)	MAP2K6, IL6ST, IL1A, MAPK1, SOS2, MAPK13, JAK2, IL6, SHC1, IKBKB, NFKBIA, SOS1, CSNK2A1, MAP2K1, IL1RAP, TNFRSF11B, IL8, MAP2K7, NRAS, RRAS, GRB2, MAPK8, NFKB2, IL1R1, CEBPB, IL33, COL1A1, FOS, IL18, RRAS2, PTPN11, IL1RN, IL1B, HSPB7, MAP2K3, TNFAIP6, ELK1, A2M, HSPB1
BMP signaling pathway	0.0138038	12/80 (15%)	0/80 (0%)	19/80 (24%)	49/80 (61%)	PRKACB, BMP4, MAPK1, BMP2, BMPR2, MAPK13, RUNX2, SOS1, CREB1, SMAD4, SMAD1, MAP2K1, FST, NRAS, SMAD9, HOXC9, RRAS, GRB2, SMAD7, MAPK8, NFKB2, PITX2, BMP5, ATF2, ZNF423, NKX2-5, BMPR1B, RRAS2, PRKAR2B, PRKAG2, PRKAR1A
PAK Signaling	0.0144544	12/107 (11%)	0/107 (0%)	25/107 (23%)	70/107 (65%)	PIK3CA, CDC42, MAPK1, PIK3R1, ARHGEF7, SOS2, LIMK2, PDGFC, PTK2, MYLK, SHC1, PAK1, WASL (includes EG:8976), SOS1, PDGFRA, MAP2K1, ITGA4, ITGB1, PXN, PAK2, NRAS, PIK3C2A, RRAS, GRB2, ITGA2, RAC1, MAPK8, PIK3C2G, ITGA5, EPHA3, ITGA3, PIK3R3, RRAS2, PAK3, CFL2, PAK7, PDGFD
Role of NFAT in Regulation of the Immune Response	0.0147911	29/203 (14%)	0/203 (0%)	38/203 (19%)	136/203 (67%)	FCGR2C, HLA-DOA, MAPK1, TRD@, NFATC3, PIK3R1, SOS2, RCAN2, CSNK1A1, GNB5, FCER1A, HLA-DRB1, HLA-DMB, FCGR1A, GNB1, IKBKB, GNB4, LCK, GNA15, XPO1, GNA13, ITK, ITPR2, RRAS, RAC1, PPP3CC, NFKB2, ITPR1, RCAN1, ATF2, HLA-DQB1, PIK3R3, SYK, ITPR3, RCAN3, TRA@, LCP2, FCGR3B, FYN, PIK3CA, HLA-DQA1, GNA14, FCGR2B, GNG7, CSNK1E, NFKBIA, PPP3CB, HLA-DRA, SOS1, AKT3, MAP2K1, FCGR1B, HLA-DMA, NRAS, PIK3C2A, F…
Riboflavin Metabolism	0.0151356	8/55 (15%)	0/55 (0%)	6/55 (11%)	41/55 (75%)	MINPP1, FLAD1 (includes EG:80308), NUP160, PPIP5K1, ENPP5, PPAPDC2, ENPP3, ACP6, ACP1, CILP, CILP2, ENPP2, SGPP1, ACPP
Factors Promoting Cardiogenesis in Vertebrates	0.0169824	21/95 (22%)	0/95 (0%)	15/95 (16%)	59/95 (62%)	FZD10, TCF4, TGFBR1, BMP4, BMP2, LRP6, BMPR2, ACVR2B, TCF7, TGFB2, SMAD4, CTNNB1, FZD2, SMAD1, ACVR1C, PRKCA, NOX4, SMAD9, CDC6, TCF7L1, TCF3, BMP5, ATF2, NKX2-5, CCNE1, BMPR1B, PRKCI, FZD4, FZD3, FZD5, LEF1, DKK1, ACVR2A, TCF7L2, CDK2, FZD7
Actin Cytoskeleton Signaling	0.0177828	27/238 (11%)	0/238 (0%)	52/238 (22%)	159/238 (67%)	MAPK1, PIK3R1, SOS2, PIKFYVE, LIMK2, MYH11, MYH7B (includes EG:57644), MYLK, PTK2, PAK1, CYFIP2 (includes EG:26999), EZR, BAIAP2, DIAPH2, ACTG2 (includes EG:72), GNA13, ITGA4, FGF19 (includes EG:9965), ACTR2, TIAM1, RRAS, CRKL, MYH14, RAC1, RDX, ITGA5, WASF1, FGD1, PIK3R3, PIP5K1A, TIAM2 (includes EG:26230), CFL2, ARPC2, PPP1R12B, PAK7, VAV1, WASF2, PDGFD, PPP1CC, ABI2, PIK3CA, FN1, CDC42, FGF2, …
IL-10 Signaling	0.0194984	8/78 (10%)	0/78 (0%)	21/78 (27%)	49/78 (63%)	MAP2K6, SOCS3, FCGR2C, IL1A, JAK1, MAPK1, ARG2, MAPK13, IL6, FCGR2B, HMOX1, IKBKB, NFKBIA, SP1, IL1RAP, CCR1, IL4R, FCGR2A, MAPK8, IL1R1, NFKB2, IL33, FOS, IL18, IL1RN, IL10RB, IL1B, MAP2K3, ELK1
Growth Hormone Signaling	0.0194984	13/75 (17%)	0/75 (0%)	16/75 (21%)	46/75 (61%)	SOCS3, PIK3CA, MAPK1, PIK3R1, SOCS6, SOCS2, RPS6KA3, JAK2, IGF1, STAT1, STAT5B, PRKCA, RPS6KB1, PIK3C2A, PIK3C2G, PLCG1, SOCS4, PIK3R3, FOS, RPS6KA6, IGF2, PRKCI, IRS1, IGFBP3, RPS6KA5, RPS6KA1, SOCS7, ELK1, A2M
TREM1 Signaling	0.0199526	10/69 (14%)	0/69 (0%)	15/69 (22%)	44/69 (64%)	TLR1, TREM1, ICAM1, MAPK1, IL6, JAK2, FCGR2B, TLR10, TLR7, CASP1, AKT3, TLR3, STAT5B, ITGB1, IL8, GRB2, RAC1, ITGA5, PLCG1, NFKB2, TLR4, NOD2, IL18, CD40, IL1B
IL-15 Production	0.0218776	3/32 (9%)	0/32 (0%)	11/32 (34%)	18/32 (56%)	JAK1, TWF1, IL15, JAK2, NFKB2, IL6, FRK, PTK2, TXK, PRKCI, PTK6, MST1R, STAT1, JAK3
GNRH Signaling	0.0223872	16/145 (11%)	0/145 (0%)	32/145 (22%)	97/145 (67%)	PRKACB, MAP2K6, CDC42, MAPK1, SOS2, MAPK13, MAP3K5 (includes EG:4217), MAP3K4, CREB5, PTK2, PAK1, CAMK2D, SOS1, CREB1, MAP2K1, PRKCA, MAP3K2, ADCY9, MAP2K7, PAK2, NRAS, ITPR2, RRAS, GRB2, EGR1, RAC1, GNAI1, MAPK8, DNM3, NFKB2, ITPR1, ATF2, GNAS, GNAI3, FOS, PLCB4, PRKCI, PRKAR2B, RRAS2, PAK3, ADCY1, ITPR3, GNRH1, PRKAG2, PAK7, MAP2K3, ELK1, PRKAR1A
CNTF Signaling	0.0223872	6/55 (11%)	0/55 (0%)	17/55 (31%)	32/55 (58%)	IL6ST, RPS6KB1, PIK3CA, JAK1, NRAS, PIK3C2A, MAPK1, GRB2, RRAS, PIK3R1, RPS6KA3, PIK3C2G, JAK2, PIK3R3, LIFR, RPS6KA6, RRAS2, PTPN11, SOS1, RPS6KA5, RPS6KA1, STAT1, MAP2K1
Thrombopoietin Signaling	0.0234423	7/63 (11%)	0/63 (0%)	17/63 (27%)	39/63 (62%)	GAB2, PIK3CA, NRAS, PIK3C2A, MAPK1, GRB2, RRAS, PIK3R1, PIK3C2G, PLCG1, JAK2, MYC, PIK3R3, SHC1, FOS, PRKCI, RRAS2, PTPN11, SOS1, IRS2, STAT5B, STAT1, MAP2K1, PRKCA
Phospholipase C Signaling	0.0245471	37/260 (14%)	0/260 (0%)	47/260 (18%)	176/260 (68%)	FCGR2C, MAPK1, TRD@, NFATC3, DIRAS3, SOS2, GNB5, CREB5, GNB1, GNB4, LCK, RHOB, GNA13, ITGA4, ITK, RND2, ADCY9, PLD3, HDAC4, RRAS, ITPR2, RAC1, ITGA5, PPP1R14A, RAPGEF3, RHOJ, ITPR1, NFKB2, PPP3CC, RAP1A, PLD1, ATF2, PLA2G4C, RHOQ, SYK, ITPR3, PPP1R12B, LCP2, TRA@, PPP1CC, FYN, NAPEPLD, RALA, ARHGEF7, PLA2G10, RPS6KA3, FCGR2B, GNG7, TGM2, HMOX1, ARHGEF19, SHC1, AHNAK, PPP3CB, RHOT1, CREB1, SOS1, R…
NF-κB Signaling	0.0245471	29/176 (16%)	0/176 (0%)	34/176 (19%)	113/176 (64%)	PRKACB, TLR1, TRAF3, BMP4, TGFBR1, TRD@, PIK3R1, TNFRSF17, FGFR3, IKBKB, TLR10, LCK, FGFR4, CSNK2A1, TRAF5, TNFRSF11B, RRAS, FGFR1, RAC1, FGFR2, MALT1, NFKB2, DDR1, PIK3R3, IL33, BMPR1B, IL18, CD40, IL1RN, KLK2, FGFRL1, TRA@, MAP2K6, AZI2, PIK3CA, IL1A, BMP2, TNFAIP3, BMPR2, NFKBIA, CARD10, TLR7, PDGFRA, AKT3, TLR3, TNFSF11, MAP2K7, NRAS, PIK3C2A, RELB, HDAC1, MAPK8, PIK3C2G, IL1R1, IRAK3, TNFRSF…
Pathogenesis of Multiple Sclerosis	0.0263027	4/9 (44%)	0/9 (0%)	2/9 (22%)	3/9 (33%)	CXCL10, CCR1, CXCL9, CCL4, CCL5, CXCL11
Amyotrophic Lateral Sclerosis Signaling	0.0263027	19/118 (16%)	0/118 (0%)	20/118 (17%)	79/118 (67%)	PIK3CA, PIK3R1, GPX1, PDGFC, BCL2, VEGFA, PAK1, CASP9, IGF1, CASP1, AKT3, FIGF, GRIK2, BIRC3, TP53, PRPH, CAPN6, CACNA1D, PIK3C2A, RAB5A, GRIK3, GRIA2, PIK3C2G, RAC1, CACNA1C, NEFH, CACNA1A, PIK3R3, BCL2L1, CAPNS1, CAT, SLC1A2, GLUL, CAPN9, CAPN2, CAPN7, SSR4, CAPN3, GRIA3
mTOR Signaling	0.0275423	23/164 (14%)	0/164 (0%)	32/164 (20%)	109/164 (66%)	PRKAB1, MAPK1, PPP2CA, DIRAS3, PIK3R1, RICTOR, VEGFA, RHOB, EIF3B, PRKAA1, FIGF, RND2, RPS6KB1, PLD3, DDIT4, RRAS, RAC1, EIF4G3, RHOJ, PLD1, PIK3R3, RPS6KA6, RHOQ, PPP2R3A, EIF4A3 (includes EG:9775), IRS1, RPS6KA1, PIK3CA, NAPEPLD, RPS6KA3, FKBP1A, PDGFC, EIF4E, HMOX1, RHOT1, PRKAA2, RHOU, AKT3, PPP2R2C, RHOF, PRKCA, MAPKAP1, NRAS, PIK3C2A, RHOC, EIF3F, PIK3C2G, PPP2R5A, RHOV, RRAS2, PRKCI, EIF4A…
Role of Macrophages, Fibroblasts and Endothelial Cells in Rheumatoid Arthritis	0.0301995	47/368 (13%)	0/368 (0%)	71/368 (19%)	250/368 (68%)	PIK3R1, KLK6, LTB, IL6, CREB5, CCND1, VEGFA, TLR10, FIGF, TRAF5, WNT5B, SFRP4, RRAS, TCF3, IL7, ATF2, KLK7, DKK4, MAP2K3, PDGFD, MAP2K6, PIK3CA, TCF4, FN1, ICAM1, FGF2, PDIA3, LRP6, CCL5, JAK2, IGHG1, KLK11, WNT7A, CREB1, TLR7, TLR3, CTNNB1, KLK10, MMP1 (includes EG:4312), TNFSF11, IL15, PRSS3 (includes EG:5646), PIK3C2G, PLCG1, IRAK3, FOS, SOST, TCF7L2, IRAK2, FZD7, TLR1, SOCS3, TRAF3, MAPK1, MM…
PI3K Signaling in B Lymphocytes	0.030903	17/146 (12%)	0/146 (0%)	34/146 (23%)	95/146 (65%)	MAPK1, NFATC3, PIK3R1, PLEKHA3, PTEN, IKBKB, CAMK2D, IRS2, IL4R, C3, RRAS, ITPR2, RAC1, ITPR1, NFKB2, MALT1, PPP3CC, ATF2, CD40, IRS1, SYK, ITPR3, PIK3AP1, VAV1, FYN, PIK3CA, ATF7, PDIA3, ATF6, FCGR2B, NFKBIA, PPP3CB, CARD10, CREB1, FOXO3, AKT3, MAP2K1, VAV2, NRAS, ATF1, PLCG1, TLR4, FOS, PLCB4, PRKCI, RRAS2, DAPP1, BCL10, VAV3, LYN, ELK1
IL-3 Signaling	0.030903	9/76 (12%)	0/76 (0%)	21/76 (28%)	46/76 (61%)	GAB2, PIK3CA, JAK1, BAD, MAPK1, PIK3R1, JAK2, SHC1, PAK1, PPP3CB, SOS1, AKT3, STAT1, STAT5B, MAP2K1, PRKCA, NRAS, PIK3C2A, RRAS, GRB2, CRKL, RAC1, PIK3C2G, PPP3CC, PIK3R3, CSF2RB, FOS, RRAS2, PRKCI, ELK1
D-glutamine and D-glutamate Metabolism	0.0316228	0/27 (0%)	0/27 (0%)	4/27 (15%)	23/27 (85%)	GLS, GLUD1, TGM4, GLUD2
Role of PKR in Interferon Induction and Antiviral Response	0.0338844	7/46 (15%)	0/46 (0%)	11/46 (24%)	28/46 (61%)	TP53, MAP2K6, TRAF3, TAB2, NFKB2, EIF2S1, RNASEL, FCGR1A, ATF2, FADD, IKBKB, NFKBIA, CASP9, MAP2K3, TRAF5, TLR3, CASP8, STAT1
O-Glycan Biosynthesis	0.0346737	4/47 (9%)	0/47 (0%)	11/47 (23%)	32/47 (68%)	GALNT7, ST6GALNAC1, GLT8D2, GALNT5, GALNTL1, GALNT1, WBSCR17, GCNT1, ST3GAL1, GALNT3, GALNT14, GALNT4, GALNT6, FUT4, GALNT10
NRF2-mediated Oxidative Stress Response	0.0354813	26/192 (14%)	0/192 (0%)	40/192 (21%)	126/192 (66%)	MAPK1, DNAJB4, PIK3R1, DNAJC6, MAF, SOD2, SCARB1, ABCC1, FOSL1, GCLM, TXN, ACTG2 (includes EG:72), DNAJC16, CBR1, MGST1, DNAJC9, RRAS, GSTM3 (includes EG:2947), JUNB, MAFF, BACH1, PIK3R3, MAP2K3, DNAJB6, ENC1, ABCC4, MGST3, MAP2K5, EPHX1, AKR7A2, MAP2K6, PIK3CA, USP14, NQO2, ACTA2, DNAJA4, DNAJC13, MAP3K5 (includes EG:4217), SOD3, DNAJB13, CUL3, HMOX1, GSTT1, GSTA4, GSTM4, FMO1, FKBP5, MAP2K1, NF…
PKCθ Signaling in T Lymphocytes	0.0389045	19/142 (13%)	0/142 (0%)	25/142 (18%)	98/142 (69%)	FYN, PIK3CA, HLA-DOA, TRD@, MAPK1, NFATC3, PIK3R1, SOS2, HLA-DQA1, HLA-DRB1, HLA-DMB, MAP3K5 (includes EG:4217), MAP3K4, IKBKB, LCK, NFKBIA, CAMK2D, PPP3CB, SOS1, HLA-DRA, MAP3K2, VAV2, HLA-DMA, NRAS, PIK3C2A, GRB2, RRAS, RAC1, MAPK8, PIK3C2G, PLCG1, PPP3CC, MALT1, NFKB2, HLA-DQB1, PIK3R3, FOS, POU2F1, RRAS2, BCL10, VAV3, VAV1, TRA@, LCP2
ERK5 Signaling	0.040738	8/69 (12%)	0/69 (0%)	19/69 (28%)	42/69 (61%)	IL6ST, LIF, YWHAH, BAD, RPS6KA3, CREB5, MYC, FOXO3, CREB1, FOSL1, GNA13, MAP3K2, RPS6KB1, NRAS, YWHAE, RRAS, MEF2A (includes EG:4205), ATF2, FOS, RPS6KA6, RRAS2, PTPN11, KLK2, RPS6KA5, RPS6KA1, SFN, MAP2K5
Insulin Receptor Signaling	0.0457088	15/141 (11%)	0/141 (0%)	34/141 (24%)	92/141 (65%)	PRKACB, SOCS3, JAK1, BAD, MAPK1, PIK3R1, SOS2, PTEN, SCNN1A, IRS2, PPP1R14C, RPS6KB1, RRAS, CRKL, RAC1, PPP1R14A, EIF2B3, PIK3R3, RHOQ, SCNN1G, PTPN11, IRS1, PPP1CC, FYN, PIK3CA, JAK2, EIF2B2, PTPRF, EIF4E, SHC1, PDE3B, SOS1, FOXO3, HLA-B, AKT3, STX4, MAP2K1, NRAS, PIK3C2A, GRB2, MAPK8, PIK3C2G, ACLY, PRKCI, PRKAR2B, RRAS2, PRKAG2, SCNN1B, PRKAR1A
Melanocyte Development and Pigmentation Signaling	0.0467735	13/91 (14%)	0/91 (0%)	20/91 (22%)	58/91 (64%)	PRKACB, PIK3CA, MAPK1, PIK3R1, SOS2, RPS6KA3, CREB5, BCL2, SHC1, SOS1, CREB1, KIT, MAP2K1, ADCY9, RPS6KB1, NRAS, PIK3C2A, RRAS, GRB2, PIK3C2G, PLCG1, ATF2, PIK3R3, GNAS, RPS6KA6, RRAS2, PRKAR2B, PTPN11, ADCY1, PRKAG2, RPS6KA5, RPS6KA1, PRKAR1A
CDK5 Signaling	0.047863	12/94 (13%)	0/94 (0%)	22/94 (23%)	60/94 (64%)	PRKACB, PPP1CC, MAPK1, BDNF, PPP2CA, CDK5R1, LAMB1, LAMA1, PPP2R2C, MAP2K1, ADCY9, ITGB1, PPP1R14C, NRAS, RRAS, PPP1R1B, CABLES1, EGR1, ITGA2, ITGA6, PPP1R14A, ITGA3, PPP2R5A, CACNA1A, FOSB, GNAS, PRKAR2B, NTRK2, RRAS2, PPP2R3A, ADCY1, PRKAG2, PPP2R1B, PRKAR1A
EIF2 Signaling	0.047863	11/104 (11%)	0/104 (0%)	23/104 (22%)	70/104 (67%)	PPP1CC, EIF2S2, PIK3CA, MAPK1, PIK3R1, SOS2, EIF1, EIF2S1, EIF2B2, EIF4E, SHC1, EIF2C4, EIF3B, EIF1AX, SOS1, EIF5, PAIP1, AKT3, MAP2K1, EIF2AK1, NRAS, PIK3C2A, EIF3F, RRAS, GRB2, RAC1, PIK3C2G, EIF2B3, EIF4G3, EIF2AK4, PIK3R3, RRAS2, EIF4A3 (includes EG:9775), EIF4A1
Virus Entry via Endocytic Pathways	0.047863	10/100 (10%)	0/100 (0%)	25/100 (25%)	65/100 (65%)	FYN, PIK3CA, CDC42, PIK3R1, CD55, ACTA2, ITGB8, HLA-A, CAV1, HLA-B, ITGB4, ACTG2 (includes EG:72), ITGB5, PRKCA, ITGA4, HLA-C, ITGB1, NRAS, PIK3C2A, RRAS, ITGA2, PIK3C2G, RAC1, ITGA6, PLCG1, ITGA5, ITGA3, FOLR1, PIK3R3, PRKCI, RRAS2, CLTA, TFRC, ITGB6, CXADR
IL-15 Signaling	0.0489779	11/70 (16%)	0/70 (0%)	15/70 (21%)	44/70 (63%)	PIK3CA, JAK1, MAPK1, PIK3R1, JAK2, MAPK13, BCL2, PTK2, SHC1, LCK, AKT3, STAT5B, MAP2K1, NRAS, PIK3C2A, RRAS, IL15, RAC1, PIK3C2G, PLCG1, NFKB2, PIK3R3, BCL2L1, RRAS2, SYK, JAK3
Glioma Signaling	0.0489779	10/116 (9%)	0/116 (0%)	28/116 (24%)	78/116 (67%)	CDKN2A, PIK3CA, CAMK1D, MAPK1, PA2G4, PIK3R1, SOS2, CDKN2C, E2F3, CCND1, PDGFC, PTEN, RB1, SHC1, CAMK2D, IGF1, SOS1, E2F5, PDGFRA, AKT3, MAP2K1, PRKCA, TP53, RBL2, NRAS, TFDP1, PIK3C2A, GRB2, RRAS, RAC1, CDK6, PIK3C2G, PLCG1, PIK3R3, IGF2, PRKCI, RRAS2, PDGFD
© 2000-2011 Ingenuity Systems, Inc. All rights reserved.
