# Supplementary material for: Progesterone Inhibits Epithelial-to-Mesenchymal Transition in Endometrial Cancer
Source: PLoS One. 2012 Jan 25;7(1):e30840. doi: 10.1371/journal.pone.0030840 (PMC3266274; doi:10.1371/journal.pone.0030840)
Supplement: Table S5 — List of MPA regulated pathways in the IKPRAB-36 endometrial cancer cell line. A list of significantly MPA regulated genes was entered in Ingenuity pathway analysis software. A fold change of +/−1.25 was used as cutoff point. Ingenuity uses a Fishers exact test for calculate significance and a p-value of <0.05 was considered statistically significant. (XLS) [file pone.0030840.s005.xls]

## Sheet: Sheet0
Table S5: List of MPA regulated pathways in the IKPRAB-36 endometrial cancer cell line
A list of significantly MPA regulated genes was entered in Ingenuity pathway analysis software. A fold change of +/- 1.25 was used as cut-off point. Ingenuity uses a Fishers exact test for calculate significance and a p-value of <0.05 was considered statistically significant.
Ingenuity Canonical Pathways	P-value	Downregulated	No change	Upregulated	No overlap with dataset	Molecules
IGF-1 Signaling	6.30957e-07	7/100 (7%)	0/100 (0%)	13/100 (13%)	80/100 (80%)	CTGF, YWHAE, RRAS, PIK3R1, SOS2, IGFBP5, IGFBP7, NEDD4, PIK3R3, FOS, NOV, JUN, FOXO1, IRS1, IGFBP3, IGF1R, PRKAG2, IRS2, IGFBP1, SFN
Neuregulin Signaling	0.00042658	5/105 (5%)	0/105 (0%)	10/105 (10%)	90/105 (86%)	ITGB1, RRAS, PIK3R1, NRG1, SOS2, HBEGF, TMEFF2, AREG, PIK3R3, HSP90B1, ERBB4, ERRFI1, ERBB2, PRKCA, ITGA4
TNFR1 Signaling	0.000489779	4/52 (8%)	0/52 (0%)	6/52 (12%)	42/52 (81%)	MAP3K14, FOS, JUN, PAK2, NFKBIA, CRADD, TNFAIP3, BID, CASP8, BIRC3
PI3K Signaling in B Lymphocytes	0.00057544	6/146 (4%)	0/146 (0%)	13/146 (9%)	127/146 (87%)	ATF3, CD79B, RRAS, PIK3R1, ATF6, FOS, PLCB4, NFKBIA, CAMK2D, JUN, PLCE1, CARD10, SYK, IRS1, IRS2, PLEKHA2 (includes EG:59339), PPP3CA, CALM1, CR2
VDR/RXR Activation	0.000912011	6/81 (7%)	0/81 (0%)	7/81 (9%)	68/81 (84%)	WT1, SPP1, PDGFA, IGFBP5, FOXO1, MXD1, NCOA1, IGFBP3, SEMA3B, IGFBP1, VDR, CALB1, PRKCA
Acute Phase Response Signaling	0.000933254	14/183 (8%)	0/183 (0%)	8/183 (4%)	161/183 (88%)	MAP3K14, SOCS3, SOCS1, FN1, RRAS, PIK3R1, C1S, SOS2, AMBP, SERPINF1, C5, IL1R1, TCF3, RBP1, PIK3R3, FOS, IL18, JUN, NFKBIA, F8, RBP2, TNFRSF11B
Hepatic Fibrosis / Hepatic Stellate Cell Activation	0.000977237	7/147 (5%)	0/147 (0%)	12/147 (8%)	128/147 (87%)	MYH10, CTGF, FN1, PDGFA, SMAD3, ACTA2, FGFR2, IFNGR1, IGFBP5, IL1R1, PGF, IL1R2, TGFBR2, MYL9 (includes EG:10398), EDN1, IGFBP3, IGF1R, TNFRSF11B, COL3A1
Molecular Mechanisms of Cancer	0.00169824	14/375 (4%)	0/375 (0%)	21/375 (6%)	340/375 (91%)	JAK1, SMAD3, PIK3R1, SOS2, TGFBR2, CTNNA2, JUN, CAMK2D, NFKBIA, RHOB, ADCY5, RHOU, BID, CASP8, FZD2, BIRC3, PRKCA, PAK2, SMAD9, RRAS, PTCH1, SMAD6, TCF3, NBN, PIK3R3, GNAS, FOS, BMPR1B, PLCB4, CCND2, FOXO1, IRS1, PRKAG2, FZD5, LEF1
TGF-β Signaling	0.0025704	5/83 (6%)	0/83 (0%)	7/83 (8%)	71/83 (86%)	TGFBR2, ZNF423, FOS, BMPR1B, JUN, SMAD9, RRAS, SMAD3, SOS2, SMAD6, VDR, TGIF1
Axonal Guidance Signaling	0.00263027	18/410 (4%)	0/410 (0%)	19/410 (5%)	373/410 (91%)	NTF3, GLI2, RGS3, PDGFA, PIK3R1, SOS2, UNC5B, ABLIM1, PGF, EFNB2, EPHB1, GLI3, ERBB2, SEMA3B, FZD2, SEMA3F, PPP3CA, UNC5C, ITGA4, PRKCA, ITGB1, PAK2, RRAS, CXCR4, SEMA5A, PTCH1, L1CAM, SLIT2, HHIP, PIK3R3, MYL9 (includes EG:10398), GNAS, PLCB4, SRGAP3, PRKAG2, FZD5, ADAM9
Role of Osteoblasts, Osteoclasts and Chondrocytes in Rheumatoid Arthritis	0.00269153	12/243 (5%)	0/243 (0%)	13/243 (5%)	218/243 (90%)	PIK3R1, IL1R2, NFKBIA, JUN, WIF1, SFRP5, FZD2, BIRC3, PPP3CA, TNFRSF11B, CALM1, ITGB1, MAP3K14, SPP1, SMAD9, SMAD6, IL1R1, TCF3, PIK3R3, FOS, BMPR1B, IL18, FOXO1, LEF1, FZD5
PI3K/AKT Signaling	0.00316228	3/142 (2%)	0/142 (0%)	13/142 (9%)	126/142 (89%)	ITGB1, JAK1, YWHAE, RRAS, PIK3R1, GDF15, SOS2, LIMS1, PIK3R3, PPP2CB, HSP90B1, NFKBIA, NANOG, FOXO1, SFN, ITGA4
Aldosterone Signaling in Epithelial Cells	0.00323594	3/172 (2%)	0/172 (0%)	16/172 (9%)	153/172 (89%)	SGK1, DNAJB4, PIK3R1, SOS2, DNAJC3, PIP5K1B, DNAJC15, NEDD4, PIK3R3, SCNN1A, HSPA4, PLCB4, HSP90B1, PLCE1, DUSP1, DNAJC1, NR3C2, PRKCA, HSPB1
PPARα/RXRα Activation	0.00416869	7/187 (4%)	0/187 (0%)	13/187 (7%)	167/187 (89%)	MAP3K14, PRKAB2, RRAS, SMAD3, SOS2, IL1R1, TGFBR2, IL1R2, GNAS, PLCB4, HSP90B1, GHR, PLCE1, NFKBIA, JUN, ADCY5, PRIC285 (includes EG:85441), IRS1, PRKAG2, PRKCA
PPAR Signaling	0.00549541	6/106 (6%)	0/106 (0%)	7/106 (7%)	93/106 (88%)	MAP3K14, RRAS, PDGFA, SOS2, IL1R1, IL1R2, FOS, HSP90B1, IL18, JUN, NFKBIA, NCOA1, TNFRSF11B
Type II Diabetes Mellitus Signaling	0.0060256	7/163 (4%)	0/163 (0%)	8/163 (5%)	148/163 (91%)	SOCS1, SOCS3, MAP3K14, PRKAB2, PIK3R1, SMPD1, PIK3R3, NFKBIA, IRS1, PRKAG2, IRS2, SLC27A3, ACSL1, TNFRSF11B, PRKCA
PTEN Signaling	0.0060256	1/123 (1%)	0/123 (0%)	13/123 (11%)	109/123 (89%)	ITGB1, RRAS, PIK3R1, SOS2, FGFR2, CNKSR3, DDR1, TGFBR2, PIK3R3, BMPR1B, GHR, FOXO1, IGF1R, ITGA4
TNFR2 Signaling	0.00630957	2/33 (6%)	0/33 (0%)	4/33 (12%)	27/33 (82%)	MAP3K14, FOS, JUN, NFKBIA, TNFAIP3, BIRC3
IL-2 Signaling	0.00691831	4/61 (7%)	0/61 (0%)	5/61 (8%)	52/61 (85%)	PIK3R3, SOCS1, FOS, JAK1, JUN, RRAS, SYK, PIK3R1, SOS2
IL-10 Signaling	0.00851138	5/78 (6%)	0/78 (0%)	5/78 (6%)	68/78 (87%)	IL1R2, SOCS3, MAP3K14, FOS, IL18, JAK1, JUN, NFKBIA, IL10RB, IL1R1
Growth Hormone Signaling	0.00851138	6/75 (8%)	0/75 (0%)	4/75 (5%)	65/75 (87%)	PIK3R3, SOCS1, SOCS3, FOS, GHR, IRS1, PIK3R1, IGF1R, IGFBP3, PRKCA
p70S6K Signaling	0.00870964	5/133 (4%)	0/133 (0%)	10/133 (8%)	118/133 (89%)	JAK1, YWHAE, CD79B, RRAS, PIK3R1, SOS2, PIK3R3, PPP2CB, PLCB4, PLCE1, IRS1, SYK, EEF2K, SFN, PRKCA
Human Embryonic Stem Cell Pluripotency	0.00912011	7/157 (4%)	0/157 (0%)	9/157 (6%)	141/157 (90%)	NTF3, PDGFA, PIK3R1, SMAD3, SMAD6, FGFR2, TCF3, TGFBR2, PIK3R3, GNAS, BMPR1B, NANOG, FZD5, LEF1, FZD2, POU5F1
Role of Macrophages, Fibroblasts and Endothelial Cells in Rheumatoid Arthritis	0.0102329	18/368 (5%)	0/368 (0%)	14/368 (4%)	336/368 (91%)	SOCS3, SOCS1, FN1, PDGFA, PIK3R1, PGF, IL1R2, WIF1, JUN, PLCE1, CAMK2D, NFKBIA, SFRP5, FZD2, PPP3CA, TNFRSF11B, PRKCA, CALM1, MAP3K14, RRAS, C1S, IL15, C5, IL1R1, TCF3, PIK3R3, FOS, IL18, PLCB4, CEBPD, FZD5, LEF1
Erythropoietin Signaling	0.0104713	5/81 (6%)	0/81 (0%)	5/81 (6%)	71/81 (88%)	PIK3R3, SOCS1, SOCS3, FOS, JUN, NFKBIA, RRAS, PIK3R1, SOS2, PRKCA
Inositol Phosphate Metabolism	0.0112202	5/181 (3%)	0/181 (0%)	11/181 (6%)	165/181 (91%)	GRK4, CDK18, DAPK1, PAK2, SGK1, PIK3R1, PIP5K1B, SYNJ2, PIK3R3, PLCB4, PRKX, INPP4B, PLCE1, SYNJ1, INPP5F, IMPA2
IL-6 Signaling	0.0128825	6/100 (6%)	0/100 (0%)	6/100 (6%)	88/100 (88%)	IL1R2, SOCS1, MAP3K14, FOS, IL18, JUN, NFKBIA, RRAS, SOS2, IL1R1, HSPB1, TNFRSF11B
Myc Mediated Apoptosis Signaling	0.0134896	4/64 (6%)	0/64 (0%)	5/64 (8%)	55/64 (86%)	PIK3R3, YWHAE, RRAS, PIK3R1, SOS2, IGF1R, BID, CASP8, SFN
Prolactin Signaling	0.0138038	6/80 (8%)	0/80 (0%)	4/80 (5%)	70/80 (88%)	PIK3R3, SOCS1, SOCS3, FOS, JUN, RRAS, IRS1, PIK3R1, SOS2, PRKCA
RAR Activation	0.0151356	11/183 (6%)	0/183 (0%)	7/183 (4%)	165/183 (90%)	SMAD9, PIK3R1, SMAD3, SMAD6, RBP1, PIK3R3, KAT2B, FOS, ALDH1A1, JUN, DUSP1, ADCY5, RARA, IGFBP3, NCOA1, PRKAG2, RBP2, PRKCA
IL-9 Signaling	0.0165959	3/40 (8%)	0/40 (0%)	3/40 (8%)	34/40 (85%)	PIK3R3, SOCS3, JAK1, IRS1, PIK3R1, IRS2
Integrin Signaling	0.0169824	3/205 (1%)	0/205 (0%)	17/205 (8%)	185/205 (90%)	ITGB1, PARVA, ARHGAP26, PAK2, RRAS, PIK3R1, ACTA2, SOS2, PPP1CB, LIMS1, ITGA10, BCAR3, PIK3R3, RHOB, ITGA9, RHOU, CAPN2, VCL, TSPAN6, ITGA4
B Cell Receptor Signaling	0.017378	5/157 (3%)	0/157 (0%)	11/157 (7%)	141/157 (90%)	MAP3K14, CD79B, RRAS, PIK3R1, EGR1, SOS2, BCL6, PIK3R3, NFKBIA, CAMK2D, JUN, CARD10, SYK, PAG1, PPP3CA, CALM1
ILK Signaling	0.018197	5/191 (3%)	0/191 (0%)	14/191 (7%)	172/191 (90%)	MUC1, ITGB1, MYH10, PARVA, FN1, PIK3R1, ACTA2, PGF, MYL9 (includes EG:10398), PIK3R3, FOS, PPP2CB, JUN, RHOB, IRS1, PPAP2B, RHOU, IRS2, LEF1
Propanoate Metabolism	0.0194984	4/130 (3%)	0/130 (0%)	5/130 (4%)	121/130 (93%)	HADHB, ALDH1A1, PCCA, ALDH3A2, SLC27A3, ALDH3A1, ALDH6A1, ACSL1, LDHA
FAK Signaling	0.020893	1/104 (1%)	0/104 (0%)	10/104 (10%)	93/104 (89%)	ITGB1, PIK3R3, ARHGAP26, PAK2, RRAS, PIK3R1, ACTA2, SOS2, CAPN2, VCL, ITGA4
EGF Signaling	0.0218776	3/52 (6%)	0/52 (0%)	4/52 (8%)	45/52 (87%)	PIK3R3, FOS, JAK1, JUN, PIK3R1, SOS2, PRKCA
VEGF Signaling	0.0223872	3/102 (3%)	0/102 (0%)	8/102 (8%)	91/102 (89%)	PIK3R3, FOXO1, YWHAE, RRAS, PIK3R1, ACTA2, SOS2, VCL, SFN, PGF, PRKCA
Lysine Degradation	0.0229087	4/136 (3%)	0/136 (0%)	4/136 (3%)	128/136 (94%)	PLOD2, HADHB, ALDH1A1, ALDH3A2, PIPOX, ELOVL2, PLOD1, ALDH3A1
HER-2 Signaling in Breast Cancer	0.0229087	3/83 (4%)	0/83 (0%)	7/83 (8%)	73/83 (88%)	ITGB1, PIK3R3, FOXO1, RRAS, PIK3R1, SOS2, NRG1, ERBB2, AREG, PRKCA
Pyruvate Metabolism	0.0229087	3/148 (2%)	0/148 (0%)	7/148 (5%)	138/148 (93%)	PDHA1 (includes EG:5160), HADHB, ALDH1A1, PC, ALDH3A2, AKR1B10, ALDH3A1, RWDD2A, ACSL1, LDHA
Agrin Interactions at Neuromuscular Junction	0.0234423	2/69 (3%)	0/69 (0%)	7/69 (10%)	60/69 (87%)	ITGB1, JUN, PAK2, RRAS, ERBB4, ACTA2, NRG1, ERBB2, ITGA4
Induction of Apoptosis by HIV1	0.0275423	4/65 (6%)	0/65 (0%)	4/65 (6%)	57/65 (88%)	MAP3K14, SLC25A4, NFKBIA, CXCR4, BID, CASP8, BIRC3, TNFRSF11B
IL-4 Signaling	0.0301995	4/76 (5%)	0/76 (0%)	5/76 (7%)	67/76 (88%)	PIK3R3, SOCS1, JAK1, RRAS, IRS1, PIK3R1, IGH@, SOS2, NR3C2
Chemokine Signaling	0.0301995	2/75 (3%)	0/75 (0%)	7/75 (9%)	66/75 (88%)	FOS, PLCB4, JUN, CAMK2D, RRAS, CXCR4, PPP1CB, PRKCA, CALM1
PDGF Signaling	0.0301995	4/79 (5%)	0/79 (0%)	5/79 (6%)	70/79 (89%)	PIK3R3, FOS, JAK1, JUN, RRAS, PDGFA, PIK3R1, SOS2, PRKCA
Sonic Hedgehog Signaling	0.030903	3/33 (9%)	0/33 (0%)	2/33 (6%)	28/33 (85%)	GLI2, GLI3, PTCH1, PRKAG2, HHIP
NF-κB Signaling	0.030903	6/176 (3%)	0/176 (0%)	11/176 (6%)	159/176 (90%)	MAP3K14, RRAS, PIK3R1, TNFAIP3, FGFR2, IL1R1, DDR1, TGFBR2, PIK3R3, IL1R2, IL18, BMPR1B, GHR, NFKBIA, CARD10, IGF1R, TNFRSF11B
Insulin Receptor Signaling	0.0316228	3/141 (2%)	0/141 (0%)	11/141 (8%)	127/141 (90%)	PPP1R14C, SOCS3, JAK1, RRAS, SGK1, PIK3R1, SOS2, PPP1CB, SCNN1A, PIK3R3, FOXO1, IRS1, PRKAG2, IRS2
Production of Nitric Oxide and Reactive Oxygen Species in Macrophages	0.0316228	6/189 (3%)	0/189 (0%)	10/189 (5%)	173/189 (92%)	PPP1R14C, MAP3K14, JAK1, PIK3R1, PPP1CB, IFNGR1, PIK3R3, PPP2CB, FOS, JUN, NFKBIA, RHOB, RHOU, SIRPA, TNFRSF11B, PRKCA
14-3-3-mediated Signaling	0.0323594	4/123 (3%)	0/123 (0%)	9/123 (7%)	110/123 (89%)	YWHAE, RRAS, PIK3R1, TUBA3C, PIK3R3, FOS, PLCB4, JUN, PLCE1, FOXO1, TUBA3D, SFN, PRKCA
HMGB1 Signaling	0.0323594	3/101 (3%)	0/101 (0%)	8/101 (8%)	90/101 (89%)	PIK3R3, KAT2B, FOS, JUN, RHOB, RRAS, PIK3R1, RHOU, IFNGR1, IL1R1, TNFRSF11B
IL-3 Signaling	0.0354813	3/76 (4%)	0/76 (0%)	6/76 (8%)	67/76 (88%)	PIK3R3, FOS, JAK1, JUN, FOXO1, RRAS, PIK3R1, PPP3CA, PRKCA
Wnt/β-catenin Signaling	0.0354813	11/175 (6%)	0/175 (0%)	6/175 (3%)	158/175 (90%)	SOX4, GJA1, SOX13, TCF3, TGFBR2, PPP2CB, SOX9, JUN, WIF1, RARA, CD44, TLE4, SFRP5, FZD5, LEF1, FZD2, POU5F1
Role of NFAT in Cardiac Hypertrophy	0.0354813	4/211 (2%)	0/211 (0%)	14/211 (7%)	193/211 (91%)	RRAS, PIK3R1, RCAN2, SOS2, HDAC9 (includes EG:9734), TGFBR2, PIK3R3, GNAS, PLCB4, CAMK2D, PLCE1, ADCY5, IGF1R, PRKAG2, SLC8A1, PPP3CA, CALM1, PRKCA
Butanoate Metabolism	0.0363078	4/132 (3%)	0/132 (0%)	4/132 (3%)	124/132 (94%)	PDHA1 (includes EG:5160), HADHB, OXCT2, ALDH1A1, ALDH3A2, ELOVL2, MYO5B, ALDH3A1
Clathrin-mediated Endocytosis Signaling	0.0371535	7/171 (4%)	0/171 (0%)	9/171 (5%)	155/171 (91%)	ITGB1, SH3BP4, EPS15, PDGFA, FGF9, PIK3R1, ACTA2, SH3GL2, PGF, PIK3R3, SYNJ1, TFRC, DAB2, SH3KBP1, SNAP91, PPP3CA
Cardiac Hypertrophy Signaling	0.0371535	6/246 (2%)	0/246 (0%)	15/246 (6%)	225/246 (91%)	MAP3K14, RRAS, PIK3R1, ATF6, TGFBR2, MYL9 (includes EG:10398), PIK3R3, GNAS, PLCB4, JUN, PLCE1, RHOB, ADCY5, IRS1, IGF1R, RHOU, PRKAG2, ADRA2C, PPP3CA, CALM1, HSPB1
Protein Kinase A Signaling	0.0380189	8/325 (2%)	0/325 (0%)	19/325 (6%)	298/325 (92%)	MYH10, SMAD3, PPP1CB, TGFBR2, NFKBIA, CAMK2D, PLCE1, GLI3, ADCY5, PPP3CA, PRKCA, CALM1, PPP1R14C, YWHAE, PPP1R1B, PTCH1, PYGL, TCF3, MYL9 (includes EG:10398), GNAS, AKAP13, PLCB4, KDELR3, PRKAG2, PDE8B, LEF1, SFN
T Cell Receptor Signaling	0.0389045	3/110 (3%)	0/110 (0%)	8/110 (7%)	99/110 (90%)	PIK3R3, FOS, TXK, JUN, NFKBIA, RRAS, PAG1, PIK3R1, SOS2, PPP3CA, CALM1
Ovarian Cancer Signaling	0.0389045	7/145 (5%)	0/145 (0%)	7/145 (5%)	131/145 (90%)	GJA1, RRAS, PIK3R1, FGF9, PTGS1, TCF3, PGF, PIK3R3, EDN1, PRKAG2, CD44, LEF1, FZD5, FZD2
Glioblastoma Multiforme Signaling	0.0398107	5/166 (3%)	0/166 (0%)	10/166 (6%)	151/166 (91%)	RRAS, PDGFA, PIK3R1, SOS2, TCF3, PIK3R3, PLCB4, PLCE1, RHOB, FOXO1, IGF1R, RHOU, FZD5, LEF1, FZD2
GNRH Signaling	0.040738	4/145 (3%)	0/145 (0%)	9/145 (6%)	132/145 (91%)	MAP3K14, PAK2, RRAS, EGR1, SOS2, GNAS, FOS, PLCB4, JUN, CAMK2D, ADCY5, PRKAG2, PRKCA
CDK5 Signaling	0.0416869	1/94 (1%)	0/94 (0%)	9/94 (10%)	84/94 (89%)	ITGB1, PPP2CB, PPP1R14C, GNAS, PPP1R1B, RRAS, ADCY5, EGR1, PRKAG2, PPP1CB
Role of NANOG in Mammalian Embryonic Stem Cell Pluripotency	0.0436516	2/117 (2%)	0/117 (0%)	10/117 (9%)	105/117 (90%)	PIK3R3, LIFR, BMPR1B, NANOG, JAK1, SMAD9, RRAS, PIK3R1, SOS2, FZD5, FZD2, POU5F1
Glucocorticoid Receptor Signaling	0.0436516	6/284 (2%)	0/284 (0%)	17/284 (6%)	261/284 (92%)	MAP3K14, JAK1, RRAS, SMAD3, PIK3R1, SOS2, SLPI, TGFBR2, PIK3R3, IL1R2, HSPA4, TSC22D3, FOS, KAT2B, HSP90B1, JUN, NFKBIA, DUSP1, NCOA1, NR3C2, CDKN1C, FKBP5, PPP3CA
NF-κB Activation by Viruses	0.0436516	4/85 (5%)	0/85 (0%)	5/85 (6%)	76/85 (89%)	ITGB1, PIK3R3, MAP3K14, NFKBIA, RRAS, PIK3R1, ITGA4, PRKCA, CR2
© 2000-2011 Ingenuity Systems, Inc. All rights reserved.
