# Supplementary material for: Progesterone Inhibits Epithelial-to-Mesenchymal Transition in Endometrial Cancer
Source: PLoS One. 2012 Jan 25;7(1):e30840. doi: 10.1371/journal.pone.0030840 (PMC3266274; doi:10.1371/journal.pone.0030840)
Supplement: Table S6 — Pathways significantly regulated in the IKPRAB-36 cell line and in endometrial cancer patient samples. A p-value of <0.05 was considered to be statistically significant. A grey colored pathway resembles a known EMT associated pathway. (XLS) [file pone.0030840.s006.xls]

## Sheet: match
Table S6: Pathways significantly regulated in the IKPRAB-36 cell line and in endometrial cancer patient samples.
A p-value of < 0.05 was considered to be statistically significant. A grey colored pathway resembles a known EMT associated pathway.
Ingenuity Canonical Pathways	P-value IKPRAB-36	P-value Patient Samples	Molecules in PRAB36	Molecules in Patient samples
Integrin Signaling	0.0169824	1.28825e-06	ITGB1, PARVA, ARHGAP26, PAK2, RRAS, PIK3R1, ACTA2, SOS2, PPP1CB, LIMS1, ITGA10, BCAR3, PIK3R3, RHOB, ITGA9, RHOU, CAPN2, VCL, TSPAN6, ITGA4	RAP2B, ARHGAP26, MAPK1, PIK3R1, DIRAS3, SOS2, TLN1, LIMS1, PTEN, MYLK, PTK2, PARVB, TSPAN3, PAK1, RHOB, ITGA11, ARF4, GRB7, CAV1, ITGAV, ITGB4, ACTG2 (includes EG:72), ITGB5, ITGA4, RND2, ACTR2, CAPN6, RRAS, CRKL, ITGA6, RAC1, ITGA5, TSPAN2, RHOJ, BCAR3, RAP1A, PIK3R3, ARHGAP5, RHOQ, ITGAM, ARPC2, PPP1R12B, ZYX, CAPN2, PAK7, CAPN7, ITGB6, CAPN3, FYN, PPP1CC, ITGA2B (includes EG:3674), PIK3CA, RAL…
Molecular Mechanisms of Cancer	0.00169824	7.07946e-06	JAK1, SMAD3, PIK3R1, SOS2, TGFBR2, CTNNA2, JUN, CAMK2D, NFKBIA, RHOB, ADCY5, RHOU, BID, CASP8, FZD2, BIRC3, PRKCA, PAK2, SMAD9, RRAS, PTCH1, SMAD6, TCF3, NBN, PIK3R3, GNAS, FOS, BMPR1B, PLCB4, CCND2, FOXO1, IRS1, PRKAG2, FZD5, LEF1	RAP2B, SHH, TGFBR1, BMP4, APH1B, PIK3R1, TAB2, SOS2, CDKN2C, NCSTN, MAPK13, CCND1, RB1, PAK1, GNA15, GNA13, HIPK2, CASP10, TP53, RND2, TFDP1, RRAS, NFKB2, TCF3, RAP1A, RASGRF2, CCND3, IRS1, PAK7, MAP2K3, MAP2K6, FYN, PIK3CA, TCF4, RALA, CDC42, ARHGEF7, LRP6, CTNNA1, BMPR2, PSEN2, JAK2, MAP3K5 (includes EG:4217), GNA14, CASP6, ARHGEF19, SOS1, E2F5, RHOU, ARHGEF3, CTNNB1, CASP8, PRKDC, PAK2, RHOC, …
IGF-1 Signaling	6.30957e-07	5.12861e-05	CTGF, YWHAE, RRAS, PIK3R1, SOS2, IGFBP5, IGFBP7, NEDD4, PIK3R3, FOS, NOV, JUN, FOXO1, IRS1, IGFBP3, IGF1R, PRKAG2, IRS2, IGFBP1, SFN	PRKACB, IGFBP4, PIK3CA, CTGF, BAD, MAPK1, YWHAH, PIK3R1, SOS2, IGFBP7, PTK2, SHC1, CASP9, IGF1, FOXO3, SOS1, CSNK2A1, AKT3, IRS2, MAP2K1, RPS6KB1, PXN, NRAS, PIK3C2A, YWHAE, GRB2, RRAS, RAC1, MAPK8, PIK3C2G, IGFBP5, NEDD4, IGFBP2, PIK3R3, FOS, PRKCI, PRKAR2B, RRAS2, NOV, PTPN11, IRS1, IGFBP3, PRKAG2, SFN, ELK1, PRKAR1A
Glioblastoma Multiforme Signaling	0.0398107	0.000141254	RRAS, PDGFA, PIK3R1, SOS2, TCF3, PIK3R3, PLCB4, PLCE1, RHOB, FOXO1, IGF1R, RHOU, FZD5, LEF1, FZD2	CDKN2A, MAPK1, DIRAS3, PIK3R1, SOS2, WNT16, CCND1, PTEN, MYC, RB1, RHOB, FZD2, WNT5B, RND2, TP53, RPS6KB1, ITPR2, RRAS, CDK6, RAC1, RHOJ, ITPR1, TCF3, PIK3R3, IGF2, RHOQ, ITPR3, FZD3, LEF1, FZD5, PDGFD, CDK2, FZD10, PIK3CA, CDC42, PDIA3, E2F3, PDGFC, WNT2, SHC1, WNT7A, IGF1, RHOT1, SOS1, RHOU, E2F5, PDGFRA, AKT3, RHOF, CTNNB1, MAP2K1, NRAS, PIK3C2A, GRB2, RHOC, WNT2B, PIK3C2G, PLCG1, RHOV, PLCB4,…
Role of Osteoblasts, Osteoclasts and Chondrocytes in Rheumatoid Arthritis	0.00269154	0.000218776	PIK3R1, IL1R2, NFKBIA, JUN, WIF1, SFRP5, FZD2, BIRC3, PPP3CA, TNFRSF11B, CALM1, ITGB1, MAP3K14, SPP1, SMAD9, SMAD6, IL1R1, TCF3, PIK3R3, FOS, BMPR1B, IL18, FOXO1, LEF1, FZD5	BMP4, MAPK1, MMP3, BAD, NFATC3, PIK3R1, TAB2, CSNK1A1, WNT16, MMP13, IL6, TCF7, IL18R1, IKBKB, WIF1, CASP9, RUNX2, DKK2, TRAF5, BIRC3, SMAD1, IL1RAP, ADAMTS5, FZD2, WNT5B, TNFRSF11B, SFRP4, SPP1, SMAD9, RAC1, ITGA5, PPP3CC, TCF3, IL7, PIK3R3, IL33, IL18, BMPR1B, IL1RN, FZD3, DKK4, MAP2K3, FZD5, LEF1, MAP2K6, FZD10, TCF4, IL1A, PIK3CA, SFRP2, FRZB, MMP14, BMP2, LRP6, BMPR2, MAP3K5 (includes EG:421…
FAK Signaling	0.020893	0.000239883	ITGB1, PIK3R3, ARHGAP26, PAK2, RRAS, PIK3R1, ACTA2, SOS2, CAPN2, VCL, ITGA4	FYN, PIK3CA, ARHGAP26, MAPK1, ARHGEF7, HMMR, PIK3R1, SOS2, ACTA2, TLN1, PTEN, PTK2, PAK1, SOS1, AKT3, ACTG2 (includes EG:72), VCL, MAP2K1, ITGA4, ITGB1, PXN, CAPN6, NRAS, PAK2, PIK3C2A, GRB2, RRAS, ITGA2, RAC1, PIK3C2G, PLCG1, ITGA5, ITGA3, PIK3R3, RRAS2, CAPNS1, PAK3, PAK7, CAPN9, CAPN2, CAPN7, TNS1, CAPN3
Hepatic Fibrosis / Hepatic Stellate Cell Activation	0.000977237	0.000281838	MYH10, CTGF, FN1, PDGFA, SMAD3, ACTA2, FGFR2, IFNGR1, IGFBP5, IL1R1, PGF, IL1R2, TGFBR2, MYL9 (includes EG:10398), EDN1, IGFBP3, IGF1R, TNFRSF11B, COL3A1	CTGF, TGFBR1, MMP13, MYH11, IL6, MYH7B (includes EG:57644), VEGFA, CXCL3, CYP2E1, LAMA1, FIGF, IL1RAP, TIMP2, TNFRSF11B, IL8, IL4R, CXCL9, MYH14, FGFR1, FGFR2, BAMBI, MMP2, IGFBP5, NFKB2, MET, CD40, IGFBP3, IFNAR1, AGTR1, COL3A1, IGFBP4, IL1A, FN1, ICAM1, FGF2, LEPR, ACTA2, CCL5, PDGFC, FAS, BCL2, COL1A2, EDN1, IGF1, TIMP1, HGF, TGFB2, PDGFRA, SMAD4, STAT1, MMP1 (includes EG:4312), VCAM1, EDNRB, …
PTEN Signaling	0.0060256	0.000457088	ITGB1, RRAS, PIK3R1, SOS2, FGFR2, CNKSR3, DDR1, TGFBR2, PIK3R3, BMPR1B, GHR, FOXO1, IGF1R, ITGA4	TGFBR1, BAD, MAPK1, YWHAH, PIK3R1, SOS2, CCND1, PTEN, PTK2, FGFR3, IKBKB, CASP9, FGFR4, CSNK2A1, ITGA4, RPS6KB1, RRAS, FGFR1, RAC1, FGFR2, ITGA5, NFKB2, FOXG1, DDR1, PIK3R3, BCL2L1, BMPR1B, FGFRL1, PIK3CA, CDC42, BMPR2, BCL2, SHC1, SOS1, FOXO3, PDGFRA, AKT3, MAP2K1, ITGB1, NRAS, GRB2, ITGA2, CNKSR3, ITGA3, TNFRSF11A, NTRK2, RRAS2, CDKN1B, BCL2L11
HMGB1 Signaling	0.0323594	0.000645654	PIK3R3, KAT2B, FOS, JUN, RHOB, RRAS, PIK3R1, RHOU, IFNGR1, IL1R1, TNFRSF11B	MAP2K6, PIK3CA, IL1A, ICAM1, CDC42, MAPK1, PIK3R1, DIRAS3, RBBP7, MAPK13, SP1, RHOB, RHOT1, RHOU, AKT3, RHOF, SERPINE1, MAP2K1, PLAT, TNFRSF11B, RND2, IL8, VCAM1, MAP2K7, NRAS, PIK3C2A, RRAS, RHOC, MYST4, RAC1, MAPK8, PIK3C2G, RHOJ, IL1R1, NFKB2, PIK3R3, TLR4, FOS, RHOV, RRAS2, RHOQ, MAP2K3, ELK1, MAP2K5
Prolactin Signaling	0.0138038	0.00104713	PIK3R3, SOCS1, SOCS3, FOS, JUN, RRAS, IRS1, PIK3R1, SOS2, PRKCA	SOCS3, FYN, PIK3CA, MAPK1, PIK3R1, SOCS6, SOS2, SOCS2, JAK2, NR3C1, TCF7, MYC, SHC1, SP1, SOS1, PRLR, STAT1, STAT5B, MAP2K1, PRKCA, NRAS, PIK3C2A, RRAS, GRB2, PIK3C2G, PLCG1, SOCS4, CEBPB, PIK3R3, FOS, RRAS2, PRKCI, PTPN11, IRS1, SOCS7
VEGF Signaling	0.0223872	0.00144544	PIK3R3, FOXO1, YWHAE, RRAS, PIK3R1, ACTA2, SOS2, VCL, SFN, PGF, PRKCA	EIF2S2, PIK3CA, BAD, MAPK1, PIK3R1, SOS2, ACTA2, EIF1, EIF2S1, EIF2B2, PDGFC, ELAVL1, ARNT, BCL2, PTK2, VEGFA, SHC1, EIF1AX, FOXO3, SOS1, FIGF, AKT3, ACTG2 (includes EG:72), VCL, MAP2K1, PRKCA, PXN, NRAS, YWHAE, PIK3C2A, GRB2, RRAS, RAC1, PIK3C2G, EIF2B3, PLCG1, ROCK1, PIK3R3, BCL2L1, RRAS2, SFN
PI3K/AKT Signaling	0.00316228	0.00186209	ITGB1, JAK1, YWHAE, RRAS, PIK3R1, GDF15, SOS2, LIMS1, PIK3R3, PPP2CB, HSP90B1, NFKBIA, NANOG, FOXO1, SFN, ITGA4	GAB2, JAK1, BAD, MAPK1, YWHAH, PPP2CA, PIK3R1, SOS2, LIMS1, CCND1, PTEN, IKBKB, MCL1, ITGA4, TP53, RPS6KB1, YWHAE, RRAS, RAC1, ITGA5, NFKB2, MAPK8IP1, PIK3R3, BCL2L1, PPP2R3A, PIK3CA, MAP3K5 (includes EG:4217), JAK2, EIF4E, BCL2, SHC1, NFKBIA, HSP90AB1, SOS1, FOXO3, HLA-B, AKT3, PPP2R2C, CTNNB1, MAP2K1, ITGB1, NRAS, GRB2, ITGA2, ITGA3, PPP2R5A, RRAS2, PTGS2, CDKN1B, JAK3, SFN, PPP2R1B
Neuregulin Signaling	0.00042658	0.00190546	ITGB1, RRAS, PIK3R1, NRG1, SOS2, HBEGF, TMEFF2, AREG, PIK3R3, HSP90B1, ERBB4, ERRFI1, ERBB2, PRKCA, ITGA4	NRG2, BAD, MAPK1, BTC, PIK3R1, SOS2, CDK5R1, PTEN, MYC, SHC1, HSP90AB1, ERBB4, SOS1, GRB7, AKT3, ERRFI1, ERBB2, STAT5B, MAP2K1, ITGA4, PRKCA, ITGB1, RPS6KB1, NRAS, GRB2, RRAS, CRKL, DCN, ITGA2, RAC1, PLCG1, ITGA5, HBEGF, ITGA3, PIK3R3, PRKCI, RRAS2, PTPN11, TGFA, CDKN1B, ELK1
Acute Phase Response Signaling	0.000933254	0.00204174	MAP3K14, SOCS3, SOCS1, FN1, RRAS, PIK3R1, C1S, SOS2, AMBP, SERPINF1, C5, IL1R1, TCF3, RBP1, PIK3R3, FOS, IL18, JUN, NFKBIA, F8, RBP2, TNFRSF11B	SOCS3, MAPK1, PIK3R1, SOS2, SOCS6, CP, IL6, MAPK13, RBP1, ORM1, IKBKB, SOD2, ITIH2, OSMR, SERPINE1, IL1RAP, TNFRSF11B, C3, RRAS, RAC1, NFKB2, TCF3, CRABP1, IL33, PIK3R3, IL18, PTPN11, C4BPA, IL1RN, MAP2K3, C2, IL6ST, MAP2K6, TCF4, PIK3CA, SERPING1, IL1A, FN1, APOA1, SOCS2, AMBP, MAP3K5 (includes EG:4217), JAK2, NR3C1, HMOX1, SHC1, NFKBIA, F8, SOS1, CFB, AKT3, SERPINA1, MAP2K1, MAP2K7, NRAS, GRB2,…
Agrin Interactions at Neuromuscular Junction	0.0234423	0.00245471	ITGB1, JUN, PAK2, RRAS, ERBB4, ACTA2, NRG1, ERBB2, ITGA4	CHRNA1, NRG2, CDC42, MAPK1, ARHGEF7, ACTA2, PTK2, PAK1, ERBB4, UTRN, LAMB1, ACTG2 (includes EG:72), ERBB2, ITGA4, ITGB1, PXN, PAK2, NRAS, RRAS, LAMA2, ITGA2, MAPK8, RAC1, ITGA6, ITGA5, ITGA3, RRAS2, PAK3, GABPA, PAK7, AGRN, CTTN
Axonal Guidance Signaling	0.00263027	0.0025704	NTF3, GLI2, RGS3, PDGFA, PIK3R1, SOS2, UNC5B, ABLIM1, PGF, EFNB2, EPHB1, GLI3, ERBB2, SEMA3B, FZD2, SEMA3F, PPP3CA, UNC5C, ITGA4, PRKCA, ITGB1, PAK2, RRAS, CXCR4, SEMA5A, PTCH1, L1CAM, SLIT2, HHIP, PIK3R3, MYL9 (includes EG:10398), GNAS, PLCB4, SRGAP3, PRKAG2, FZD5, ADAM9	SHH, BMP4, PIK3R1, SOS2, NTN1, ADAM8, VEGFA, GNB1, GNB4, EPHB1, PAK1, GNA15, BAIAP2, FIGF, GNA13, WNT5B, ITGA4, ACTR2, RRAS, SEMA5A, CRKL, ITGA5, L1CAM, RAP1A, SRGAP3, ARPC2, KLK2, RTN4, PAK7, PDGFD, EPHA2, NRP1, FYN, PIK3CA, PLXNA3, UNC5A, CDC42, BDNF, ARHGEF7, SEMA6A, EPHA4, GNA14, GNG7, EIF4E, EFNB2, WNT7A, IGF1, SOS1, ADAM19, RASSF5, ROBO2, UNC5C, GLIS1, ITGB1, PAK2, NRP2, GRB2, ITGA2, PIK3C2…
PDGF Signaling	0.0301995	0.00275423	PIK3R3, FOS, JAK1, JUN, RRAS, PDGFA, PIK3R1, SOS2, PRKCA	PIK3CA, JAK1, MAPK1, PIK3R1, SOS2, JAK2, PDGFC, MYC, SHC1, SOS1, CAV1, PDGFRA, CSNK2A1, SPHK1, STAT1, MAP2K1, PRKCA, NRAS, PIK3C2A, RRAS, GRB2, CRKL, PIK3C2G, MAPK8, PLCG1, PIK3R3, FOS, RRAS2, ABL2, ACP1, PDGFD, ELK1, JAK3
Ovarian Cancer Signaling	0.0389045	0.00338844	GJA1, RRAS, PIK3R1, FGF9, PTGS1, TCF3, PGF, PIK3R3, EDN1, PRKAG2, CD44, LEF1, FZD5, FZD2	CDKN2A, PRKACB, MAPK1, PIK3R1, WNT16, CCND1, TCF7, PTEN, VEGFA, RB1, FIGF, FZD2, WNT5B, TP53, RPS6KB1, TFDP1, RRAS, RAC1, MMP2, TCF3, PIK3R3, FZD3, FZD5, LEF1, FZD10, PIK3CA, MMP7, TCF4, PA2G4, PDGFC, WNT2, BCL2, WNT7A, EDN1, AKT3, CTNNB1, MAP2K1, NRAS, PIK3C2A, WNT2B, PTGS1, PIK3C2G, TCF7L1, FZD4, PRKAR2B, RRAS2, MSH2, WNT10A, MSH6, CD44, PRKAG2, BRCA2, PTGS2, TCF7L2, PRKAR1A, FZD7
EGF Signaling	0.0218776	0.00371535	PIK3R3, FOS, JAK1, JUN, PIK3R1, SOS2, PRKCA	PIK3CA, MAP2K7, JAK1, PIK3C2A, MAPK1, ITPR2, GRB2, PIK3R1, SOS2, PIK3C2G, MAPK8, PLCG1, ITPR1, PIK3R3, SHC1, FOS, SOS1, ITPR3, CSNK2A1, STAT1, ELK1, MAP2K1, PRKCA
VDR/RXR Activation	0.000912011	0.0042658	WT1, SPP1, PDGFA, IGFBP5, FOXO1, MXD1, NCOA1, IGFBP3, SEMA3B, IGFBP1, VDR, CALB1, PRKCA	SERPINB1, CYP24A1, KLK6, HES1, CCL5, CXCL10, SP1, NCOA2, GADD45A, RUNX2, MXD1, HOXA10, TGFB2, CSNK2A1, SEMA3B, VDR, CALB1, PRKCA, DEFB4A, WT1, TNFSF11, SPP1, MED1, IGFBP5, CEBPB, KLF4, NCOA3, PRKCI, COL13A1, CYP27B1, IGFBP3, NCOA1, CDKN1B, RXRA, CST6
B Cell Receptor Signaling	0.017378	0.00446684	MAP3K14, CD79B, RRAS, PIK3R1, EGR1, SOS2, BCL6, PIK3R3, NFKBIA, CAMK2D, JUN, CARD10, SYK, PAG1, PPP3CA, CALM1	GAB2, FCGR2C, MAPK1, BAD, NFATC3, PIK3R1, SOS2, MAPK13, MAP3K4, CREB5, PTEN, IKBKB, CAMK2D, MAP3K2, ETS1, RPS6KB1, RRAS, RAC1, NFKB2, PPP3CC, MALT1, ATF2, PIK3R3, BCL2L1, PTPN11, SYK, PIK3AP1, VAV1, MAP2K3, BCL2A1, MAP2K6, PIK3CA, CDC42, MAP3K5 (includes EG:4217), FCGR2B, SHC1, NFKBIA, PPP3CB, CARD10, CREB1, SOS1, AKT3, MAP2K1, VAV2, MAP2K7, NRAS, PIK3C2A, GRB2, FCGR2A, EGR1, PIK3C2G, MAPK8, RRAS…
Role of NANOG in Mammalian Embryonic Stem Cell Pluripotency	0.0436516	0.00524807	PIK3R3, LIFR, BMPR1B, NANOG, JAK1, SMAD9, RRAS, PIK3R1, SOS2, FZD5, FZD2, POU5F1	FZD10, PIK3CA, BMP4, JAK1, LIF, MAPK1, PIK3R1, BMP2, SOS2, BMPR2, WNT16, JAK2, WNT2, LIFR, SOX2, SHC1, WNT7A, SOS1, GATA6, AKT3, SMAD4, CTNNB1, FZD2, MAP2K1, SMAD1, WNT5B, TP53, NRAS, SMAD9, PIK3C2A, GRB2, RRAS, WNT2B, RAC1, PIK3C2G, TCF7L1, BMP5, PIK3R3, BMPR1B, RRAS2, FZD4, WNT10A, FZD3, FZD5, JAK3, FZD7, SALL4
TGF-β Signaling	0.0025704	0.00645654	TGFBR2, ZNF423, FOS, BMPR1B, JUN, SMAD9, RRAS, SMAD3, SOS2, SMAD6, VDR, TGIF1	BMP4, TGFBR1, MAPK1, BMP2, SOS2, BMPR2, ACVR2B, TGIF1, RUNX2, SOS1, TGFB2, SMAD4, VDR, SERPINE1, MAP2K1, SMAD1, ACVR1C, NRAS, SMAD9, RRAS, GRB2, HOXC9, HDAC1, SMAD7, MAPK8, PITX2, ZNF423, NKX2-5, FOS, BMPR1B, RRAS2, AMH, SMURF2, ACVR2A
Wnt/β-catenin Signaling	0.0354813	0.00724436	SOX4, GJA1, SOX13, TCF3, TGFBR2, PPP2CB, SOX9, JUN, WIF1, RARA, CD44, TLE4, SFRP5, FZD5, LEF1, FZD2, POU5F1	CDKN2A, TGFBR1, PPP2CA, SOX12, CSNK1A1, WNT16, TLE1, SOX13, CCND1, TCF7, MYC, SOX2, WIF1, CSNK2A1, DKK2, FZD2, WNT5B, SOX4, TP53, SFRP4, AXIN2, RAC1, TCF3, CDH2, CDH12, CDH5, PPP2R3A, TLE3, FZD3, DKK4, FZD5, LEF1, FZD10, TCF4, MMP7, SFRP2, FRZB, LRP6, ACVR2B, KREMEN1, WNT2, CSNK1E, SOX17, SOX9, WNT7A, RARB, TGFB2, AKT3, PPP2R2C, CTNNB1, ACVR1C, WNT2B, HDAC1, TCF7L1, SOX11, PPP2R5A, FZD4, WNT10A, …
IL-2 Signaling	0.00691831	0.00758578	PIK3R3, SOCS1, FOS, JAK1, JUN, RRAS, SYK, PIK3R1, SOS2	PIK3CA, JAK1, MAPK1, PIK3R1, SOS2, SHC1, LCK, SOS1, CSNK2A1, AKT3, STAT5B, MAP2K1, NRAS, PIK3C2A, RRAS, GRB2, MAPK8, RAC1, PIK3C2G, PIK3R3, FOS, RRAS2, PTPN11, SYK, JAK3, ELK1
Myc Mediated Apoptosis Signaling	0.0134896	0.00891251	PIK3R3, YWHAE, RRAS, PIK3R1, SOS2, IGF1R, BID, CASP8, SFN	CDKN2A, PIK3CA, YWHAH, BAD, PIK3R1, SOS2, FAS, BCL2, MYC, SHC1, CASP9, IGF1, SOS1, AKT3, CASP8, TP53, NRAS, PIK3C2A, YWHAE, RRAS, GRB2, RAC1, MAPK8, PIK3C2G, FADD, PIK3R3, RRAS2, SFN
Human Embryonic Stem Cell Pluripotency	0.00912011	0.00933254	NTF3, PDGFA, PIK3R1, SMAD3, SMAD6, FGFR2, TCF3, TGFBR2, PIK3R3, GNAS, BMPR1B, NANOG, FZD5, LEF1, FZD2, POU5F1	BMP4, TGFBR1, PIK3R1, WNT16, TCF7, FGFR3, SOX2, FGFR4, SMAD1, FZD2, WNT5B, FGFR1, RAC1, FGFR2, TCF3, PIK3R3, BMPR1B, KLK2, FZD3, FZD5, LEF1, FGFRL1, PDGFD, FZD10, PIK3CA, TCF4, BDNF, FGF2, BMP2, BMPR2, PDGFC, LEFTY2, WNT2, FGF4, WNT7A, TGFB2, PDGFRA, SPHK1, AKT3, SMAD4, CTNNB1, S1PR2, PIK3C2A, WNT2B, SMAD7, PIK3C2G, TCF7L1, BMP5, GNAS, NTRK2, FZD4, WNT10A, TCF7L2, FZD7
T Cell Receptor Signaling	0.0389045	0.00933254	PIK3R3, FOS, TXK, JUN, NFKBIA, RRAS, PAG1, PIK3R1, SOS2, PPP3CA, CALM1	FYN, PIK3CA, MAPK1, NFATC3, PIK3R1, SOS2, IKBKB, LCK, TXK, NFKBIA, PPP3CB, SOS1, MAP2K1, ITK, VAV2, PTPN7, NRAS, PIK3C2A, RRAS, GRB2, PIK3C2G, MAPK8, RAC1, PLCG1, BMX, PPP3CC, MALT1, NFKB2, PIK3R3, SHB, FOS, PTPRH, RRAS2, BCL10, VAV3, PAG1, RASGRP1, VAV1, ELK1, LCP2, TRA@
HER-2 Signaling in Breast Cancer	0.0229087	0.0102329	ITGB1, PIK3R3, FOXO1, RRAS, PIK3R1, SOS2, NRG1, ERBB2, AREG, PRKCA	PIK3CA, BAD, CDC42, PIK3R1, SOS2, PARD6B, PARD6G, MAP3K5 (includes EG:4217), ITGB8, CCND1, CASP9, SOS1, AKT3, ERBB2, ITGB4, ITGB5, PRKCA, TP53, ITGB1, NRAS, PIK3C2A, RRAS, GRB2, CDK6, PIK3C2G, RAC1, PLCG1, MMP2, PIK3R3, CCNE1, RRAS2, PRKCI, CDKN1B, ITGB6
IL-4 Signaling	0.0301995	0.0109648	PIK3R3, SOCS1, JAK1, RRAS, IRS1, PIK3R1, IGH@, SOS2, NR3C2	PIK3CA, HLA-DOA, JAK1, NFATC3, PIK3R1, SOS2, HLA-DQA1, HLA-DRB1, HLA-DMB, JAK2, NR3C1, SHC1, HLA-DRA, SOS1, AKT3, HLA-DMA, RPS6KB1, IL4R, NRAS, PIK3C2A, IL13RA1, RRAS, GRB2, PIK3C2G, HMGA1, RAC1, PIK3R3, HLA-DQB1, RRAS2, IRS1, JAK3
Glucocorticoid Receptor Signaling	0.0436516	0.0125893	MAP3K14, JAK1, RRAS, SMAD3, PIK3R1, SOS2, SLPI, TGFBR2, PIK3R3, IL1R2, HSPA4, TSC22D3, FOS, KAT2B, HSP90B1, JUN, NFKBIA, DUSP1, NCOA1, NR3C2, CDKN1C, FKBP5, PPP3CA	PRKACB, TAF4B, TGFBR1, JAK1, YWHAH, MAPK1, HSPA14, NFATC3, PIK3R1, SOS2, PBX1, IL6, MAPK13, CD163, FCGR1A, PGR, HSPA4, IKBKB, CXCL3, BAG1, CDKN1C, SERPINE1, IL8, MED1, RRAS, RAC1, POLR2J2, PPP3CC, PCK1, ERCC2, MED14, NCOA3, TAF9B, PIK3R3, BCL2L1, POU2F1, SMARCA2, IL1RN, DUSP1, NCOA1, TRA@, POLR2K, PIK3CA, ICAM1, POLR2J, GTF2H2, CCL5, JAK2, SLPI, NR3C1, SMARCA4, BCL2, SHC1, TSC22D3, POLR2L (includ…
IL-6 Signaling	0.0128825	0.0128825	IL1R2, SOCS1, MAP3K14, FOS, IL18, JUN, NFKBIA, RRAS, SOS2, IL1R1, HSPB1, TNFRSF11B	MAP2K6, IL6ST, IL1A, MAPK1, SOS2, MAPK13, JAK2, IL6, SHC1, IKBKB, NFKBIA, SOS1, CSNK2A1, MAP2K1, IL1RAP, TNFRSF11B, IL8, MAP2K7, NRAS, RRAS, GRB2, MAPK8, NFKB2, IL1R1, CEBPB, IL33, COL1A1, FOS, IL18, RRAS2, PTPN11, IL1RN, IL1B, HSPB7, MAP2K3, TNFAIP6, ELK1, A2M, HSPB1
Growth Hormone Signaling	0.00851138	0.0194984	PIK3R3, SOCS1, SOCS3, FOS, GHR, IRS1, PIK3R1, IGF1R, IGFBP3, PRKCA	SOCS3, PIK3CA, MAPK1, PIK3R1, SOCS6, SOCS2, RPS6KA3, JAK2, IGF1, STAT1, STAT5B, PRKCA, RPS6KB1, PIK3C2A, PIK3C2G, PLCG1, SOCS4, PIK3R3, FOS, RPS6KA6, IGF2, PRKCI, IRS1, IGFBP3, RPS6KA5, RPS6KA1, SOCS7, ELK1, A2M
IL-10 Signaling	0.00851138	0.0194984	IL1R2, SOCS3, MAP3K14, FOS, IL18, JAK1, JUN, NFKBIA, IL10RB, IL1R1	MAP2K6, SOCS3, FCGR2C, IL1A, JAK1, MAPK1, ARG2, MAPK13, IL6, FCGR2B, HMOX1, IKBKB, NFKBIA, SP1, IL1RAP, CCR1, IL4R, FCGR2A, MAPK8, IL1R1, NFKB2, IL33, FOS, IL18, IL1RN, IL10RB, IL1B, MAP2K3, ELK1
GNRH Signaling	0.040738	0.0223872	MAP3K14, PAK2, RRAS, EGR1, SOS2, GNAS, FOS, PLCB4, JUN, CAMK2D, ADCY5, PRKAG2, PRKCA	PRKACB, MAP2K6, CDC42, MAPK1, SOS2, MAPK13, MAP3K5 (includes EG:4217), MAP3K4, CREB5, PTK2, PAK1, CAMK2D, SOS1, CREB1, MAP2K1, PRKCA, MAP3K2, ADCY9, MAP2K7, PAK2, NRAS, ITPR2, RRAS, GRB2, EGR1, RAC1, GNAI1, MAPK8, DNM3, NFKB2, ITPR1, ATF2, GNAS, GNAI3, FOS, PLCB4, PRKCI, PRKAR2B, RRAS2, PAK3, ADCY1, ITPR3, GNRH1, PRKAG2, PAK7, MAP2K3, ELK1, PRKAR1A
NF-ΚB Signaling	0.030903	0.0245471	MAP3K14, RRAS, PIK3R1, TNFAIP3, FGFR2, IL1R1, DDR1, TGFBR2, PIK3R3, IL1R2, IL18, BMPR1B, GHR, NFKBIA, CARD10, IGF1R, TNFRSF11B	PRKACB, TLR1, TRAF3, BMP4, TGFBR1, TRD@, PIK3R1, TNFRSF17, FGFR3, IKBKB, TLR10, LCK, FGFR4, CSNK2A1, TRAF5, TNFRSF11B, RRAS, FGFR1, RAC1, FGFR2, MALT1, NFKB2, DDR1, PIK3R3, IL33, BMPR1B, IL18, CD40, IL1RN, KLK2, FGFRL1, TRA@, MAP2K6, AZI2, PIK3CA, IL1A, BMP2, TNFAIP3, BMPR2, NFKBIA, CARD10, TLR7, PDGFRA, AKT3, TLR3, TNFSF11, MAP2K7, NRAS, PIK3C2A, RELB, HDAC1, MAPK8, PIK3C2G, IL1R1, IRAK3, TNFRSF…
Role of Macrophages, Fibroblasts and Endothelial Cells in Rheumatoid Arthritis	0.0102329	0.0301995	SOCS3, SOCS1, FN1, PDGFA, PIK3R1, PGF, IL1R2, WIF1, JUN, PLCE1, CAMK2D, NFKBIA, SFRP5, FZD2, PPP3CA, TNFRSF11B, PRKCA, CALM1, MAP3K14, RRAS, C1S, IL15, C5, IL1R1, TCF3, PIK3R3, FOS, IL18, PLCB4, CEBPD, FZD5, LEF1	PIK3R1, KLK6, LTB, IL6, CREB5, CCND1, VEGFA, TLR10, FIGF, TRAF5, WNT5B, SFRP4, RRAS, TCF3, IL7, ATF2, KLK7, DKK4, MAP2K3, PDGFD, MAP2K6, PIK3CA, TCF4, FN1, ICAM1, FGF2, PDIA3, LRP6, CCL5, JAK2, IGHG1, KLK11, WNT7A, CREB1, TLR7, TLR3, CTNNB1, KLK10, MMP1 (includes EG:4312), TNFSF11, IL15, PRSS3 (includes EG:5646), PIK3C2G, PLCG1, IRAK3, FOS, SOST, TCF7L2, IRAK2, FZD7, TLR1, SOCS3, TRAF3, MAPK1, MM…
PI3K Signaling in B Lymphocytes	0.00057544	0.030903	ATF3, CD79B, RRAS, PIK3R1, ATF6, FOS, PLCB4, NFKBIA, CAMK2D, JUN, PLCE1, CARD10, SYK, IRS1, IRS2, PLEKHA2 (includes EG:59339), PPP3CA, CALM1, CR2	MAPK1, NFATC3, PIK3R1, PLEKHA3, PTEN, IKBKB, CAMK2D, IRS2, IL4R, C3, RRAS, ITPR2, RAC1, ITPR1, NFKB2, MALT1, PPP3CC, ATF2, CD40, IRS1, SYK, ITPR3, PIK3AP1, VAV1, FYN, PIK3CA, ATF7, PDIA3, ATF6, FCGR2B, NFKBIA, PPP3CB, CARD10, CREB1, FOXO3, AKT3, MAP2K1, VAV2, NRAS, ATF1, PLCG1, TLR4, FOS, PLCB4, PRKCI, RRAS2, DAPP1, BCL10, VAV3, LYN, ELK1
IL-3 Signaling	0.0354813	0.030903	PIK3R3, FOS, JAK1, JUN, FOXO1, RRAS, PIK3R1, PPP3CA, PRKCA	GAB2, PIK3CA, JAK1, BAD, MAPK1, PIK3R1, JAK2, SHC1, PAK1, PPP3CB, SOS1, AKT3, STAT1, STAT5B, MAP2K1, PRKCA, NRAS, PIK3C2A, RRAS, GRB2, CRKL, RAC1, PIK3C2G, PPP3CC, PIK3R3, CSF2RB, FOS, RRAS2, PRKCI, ELK1
Insulin Receptor Signaling	0.0316228	0.0457088	PPP1R14C, SOCS3, JAK1, RRAS, SGK1, PIK3R1, SOS2, PPP1CB, SCNN1A, PIK3R3, FOXO1, IRS1, PRKAG2, IRS2	PRKACB, SOCS3, JAK1, BAD, MAPK1, PIK3R1, SOS2, PTEN, SCNN1A, IRS2, PPP1R14C, RPS6KB1, RRAS, CRKL, RAC1, PPP1R14A, EIF2B3, PIK3R3, RHOQ, SCNN1G, PTPN11, IRS1, PPP1CC, FYN, PIK3CA, JAK2, EIF2B2, PTPRF, EIF4E, SHC1, PDE3B, SOS1, FOXO3, HLA-B, AKT3, STX4, MAP2K1, NRAS, PIK3C2A, GRB2, MAPK8, PIK3C2G, ACLY, PRKCI, PRKAR2B, RRAS2, PRKAG2, SCNN1B, PRKAR1A
CDK5 Signaling	0.0416869	0.047863	ITGB1, PPP2CB, PPP1R14C, GNAS, PPP1R1B, RRAS, ADCY5, EGR1, PRKAG2, PPP1CB	PRKACB, PPP1CC, MAPK1, BDNF, PPP2CA, CDK5R1, LAMB1, LAMA1, PPP2R2C, MAP2K1, ADCY9, ITGB1, PPP1R14C, NRAS, RRAS, PPP1R1B, CABLES1, EGR1, ITGA2, ITGA6, PPP1R14A, ITGA3, PPP2R5A, CACNA1A, FOSB, GNAS, PRKAR2B, NTRK2, RRAS2, PPP2R3A, ADCY1, PRKAG2, PPP2R1B, PRKAR1A
