# Supplementary material for: Progesterone Inhibits Epithelial-to-Mesenchymal Transition in Endometrial Cancer
Source: PLoS One. 2012 Jan 25;7(1):e30840. doi: 10.1371/journal.pone.0030840 (PMC3266274; doi:10.1371/journal.pone.0030840)
Supplement: Table S7 — List and heat map of genes both regulated in the IKPRAB-36 cell line and in endometrial cancer patient samples. List of genes both regulated by MPA in the Ishikawa IKPRAB-36 cell line (n = 3) and differentially regulated between non-progressive versus progressive disease. Negative values indicate down regulation by MPA in IKPRAB-36 cells and in non-progressive as compared to progressive disease, positive values indicate up regulation by MPA in IKPRAB-36 cells and in non-progressive as compared to progressive disease. A fold chance of +/−1.25 was used as a cutoff point. (XLS) [file pone.0030840.s007.xls]

## Sheet: Heatmap
Table S6: List and heat map of genes both regulated in the IKPRAB-36 cell line and in endometrial cancer patient samples.
List of genes both regulated by MPA in the Ishikawa IKPRAB-36 cell line (n=3) and differentially regulated between non-progressive versus progressive disease. Negative values indicate down regulation by MPA in IKPRAB-36 cells and in non-progressive as compared to progressive disease, positive values indicate up regulation by MPA in IKPRAB-36 cells and in non-progressive as compared to progressive…
Affymetrix(A1)	Symbol	Entrez Gene Name	Fold Change(IKPRAB-36)	Fold Change(Patient)
			In MPA treated cells	In non-progressive patients
202935_s_at	SOX9	SRY (sex determining region Y)-box 9	-4.982	-1.95
220794_at	GREM2	gremlin 2	-4.344	-1.348
204933_s_at	TNFRSF11B	tumor necrosis factor receptor superfamily, member 11b	-3.531	-1.594
205619_s_at	MEOX1	mesenchyme homeobox 1	-3.494	-3.198
228335_at	CLDN11	claudin 11	-3.11	-4.474
209270_at	LAMB3	laminin, beta 3	-3.014	-2.181
222108_at	AMIGO2	adhesion molecule with Ig-like domain 2	-2.928	-1.795
227614_at	HKDC1	hexokinase domain containing 1	-2.897	-1.476
205799_s_at	SLC3A1	solute carrier family 3, member 1	-2.829	-2.854
1552367_a_at	SCIN	scinderin	-2.756	-1.432
222162_s_at	ADAMTS1	ADAM metallopeptidase with thrombospondin type 1 motif, 1	-2.735	-1.965
223218_s_at	NFKBIZ	nuclear factor of kappa light polypeptide gene enhancer in B-cells inhibitor, zeta	-2.553	-2.108
236489_at	GPR110	G protein-coupled receptor 110	-2.552	-1.725
204359_at	FLRT2	fibronectin leucine rich transmembrane protein 2	-2.48	-1.523
231867_at	ODZ2	odz, odd Oz/ten-m homolog 2 (Drosophila)	-2.456	-1.268
205477_s_at	AMBP	alpha-1-microglobulin/bikunin precursor	-2.445	-2.192
233446_at	ONECUT2	one cut homeobox 2	-2.444	-1.465
208025_s_at	HMGA2	high mobility group AT-hook 2	-2.429	-1.959
1553171_x_at	LRRN4	leucine rich repeat neuronal 4	-2.419	-1.345
228367_at	ALPK2	alpha-kinase 2	-2.406	-1.673
211719_x_at	FN1	fibronectin 1	-2.392	-5.255
240633_at	DOK7	docking protein 7	-2.385	-2.324
219836_at	ZBED2	zinc finger, BED-type containing 2	-2.272	-1.887
227647_at	KCNE3	potassium voltage-gated channel, Isk-related family, member 3	-2.251	-2.11
221218_s_at	TPK1	thiamin pyrophosphokinase 1	-2.25	-2.175
204470_at	CXCL1	chemokine (C-X-C motif) ligand 1 (melanoma growth stimulating activity, alpha)	-2.2	-10.387
205992_s_at	IL15	interleukin 15	-2.191	-1.529
209875_s_at	SPP1	secreted phosphoprotein 1	-2.165	-3.024
230425_at	EPHB1	EPH receptor B1	-2.159	-1.776
204304_s_at	PROM1	prominin 1	-2.158	-1.719
1560318_at	ARHGAP29	Rho GTPase activating protein 29	-2.137	-2.548
230323_s_at	TMEM45B	transmembrane protein 45B	-2.103	-1.547
220825_s_at	KIRREL	kin of IRRE like (Drosophila)	-2.069	-1.474
204596_s_at	STC1	stanniocalcin 1	-2.021	-1.955
201302_at	ANXA4	annexin A4	-1.974	-2.118
223422_s_at	ARHGAP24	Rho GTPase activating protein 24	-1.967	-1.513
219863_at	HERC5	hect domain and RLD 5	-1.957	-1.629
216997_x_at	TLE4	transducin-like enhancer of split 4 (E(sp1) homolog, Drosophila)	-1.949	-1.773
207869_s_at	CACNA1G	calcium channel, voltage-dependent, T type, alpha 1G subunit	-1.947	-1.713
209278_s_at	TFPI2	tissue factor pathway inhibitor 2	-1.921	-1.598
242626_at	SAMD5	sterile alpha motif domain containing 5	-1.918	-1.339
212124_at	ZMIZ1	zinc finger, MIZ-type containing 1	-1.908	-1.414
219310_at	TMEM90B	transmembrane protein 90B	-1.904	-1.756
202897_at	SIRPA	signal-regulatory protein alpha	-1.9	-1.374
228790_at	FAM110B	family with sequence similarity 110, member B	-1.899	-1.359
203963_at	CA12	carbonic anhydrase XII	-1.87	-1.962
204584_at	L1CAM	L1 cell adhesion molecule	-1.858	-9.608
221731_x_at	VCAN	versican	-1.856	-2.069
214235_at	CYP3A5	cytochrome P450, family 3, subfamily A, polypeptide 5	-1.855	-9.093
222996_s_at	CXXC5	CXXC finger protein 5	-1.85	-1.639
227697_at	SOCS3	suppressor of cytokine signaling 3	-1.824	-1.51
202510_s_at	TNFAIP2	tumor necrosis factor, alpha-induced protein 2	-1.822	-1.657
205534_at	PCDH7	protocadherin 7	-1.801	-1.698
201998_at	ST6GAL1	ST6 beta-galactosamide alpha-2,6-sialyltranferase 1	-1.798	-1.826
227145_at	LOXL4	lysyl oxidase-like 4	-1.793	-1.385
201280_s_at	DAB2	disabled homolog 2, mitogen-responsive phosphoprotein (Drosophila)	-1.784	-1.993
206067_s_at	WT1	Wilms tumor 1	-1.769	-6.027
202668_at	EFNB2	ephrin-B2	-1.748	-1.643
203911_at	RAP1GAP	RAP1 GTPase activating protein	-1.746	-1.983
201163_s_at	IGFBP7	insulin-like growth factor binding protein 7	-1.704	-1.322
203139_at	DAPK1	death-associated protein kinase 1	-1.7	-1.472
204032_at	BCAR3	breast cancer anti-estrogen resistance 3	-1.695	-1.37
216623_x_at	TOX3	TOX high mobility group box family member 3	-1.681	-1.548
228153_at	RNF144B	ring finger protein 144B	-1.668	-2.098
214844_s_at	DOK5	docking protein 5	-1.661	-1.711
203186_s_at	S100A4	S100 calcium binding protein A4	-1.656	-1.721
213917_at	PAX8	paired box 8	-1.648	-2.043
1556381_at	NAA15	N(alpha)-acetyltransferase 15, NatA auxiliary subunit	-1.638	-1.47
203939_at	NT5E	5'-nucleotidase, ecto (CD73)	-1.637	-2.18
202206_at	ARL4C	ADP-ribosylation factor-like 4C	-1.626	-1.59
204836_at	GLDC	glycine dehydrogenase (decarboxylating)	-1.623	-1.48
223159_s_at	NEK6	NIMA (never in mitosis gene a)-related kinase 6	-1.62	-1.257
204072_s_at	FRY	furry homolog (Drosophila)	-1.619	-1.712
204114_at	NID2	nidogen 2 (osteonidogen)	-1.615	-1.273
210026_s_at	CARD10	caspase recruitment domain family, member 10	-1.61	-1.255
214636_at	CALCB	calcitonin-related polypeptide beta	-1.606	-2.106
204446_s_at	ALOX5	arachidonate 5-lipoxygenase	-1.605	-1.74
222496_s_at	RBM47	RNA binding motif protein 47	-1.601	-1.32
210136_at	MBP	myelin basic protein	-1.6	-1.814
40093_at	BCAM	basal cell adhesion molecule (Lutheran blood group)	-1.594	-2.459
225806_at	JUB	jub, ajuba homolog (Xenopus laevis)	-1.587	-1.638
220994_s_at	STXBP6	syntaxin binding protein 6 (amisyn)	-1.576	-2.08
206295_at	IL18	interleukin 18 (interferon-gamma-inducing factor)	-1.566	-1.39
205848_at	GAS2	growth arrest-specific 2	-1.547	-2.02
215887_at	ZNF277	zinc finger protein 277	-1.533	-1.739
225478_at	MFHAS1	malignant fibrous histiocytoma amplified sequence 1	-1.528	-1.468
222664_at	KCTD15	potassium channel tetramerisation domain containing 15	-1.522	-2.638
203071_at	SEMA3B	sema domain, immunoglobulin domain (Ig), short basic domain, secreted, (semaphorin) 3B	-1.521	-1.729
219508_at	GCNT3	glucosaminyl (N-acetyl) transferase 3, mucin type	-1.519	-1.621
218574_s_at	LMCD1	LIM and cysteine-rich domains 1	-1.513	-1.327
226120_at	TTC8	tetratricopeptide repeat domain 8	-1.508	-1.332
224657_at	ERRFI1	ERBB receptor feedback inhibitor 1	-1.506	-2.219
213093_at	PRKCA	protein kinase C, alpha	-1.498	-1.512
232631_at	CDH6	cadherin 6, type 2, K-cadherin (fetal kidney)	-1.495	-2.304
203498_at	RCAN2	regulator of calcineurin 2	-1.483	-1.66
226245_at	KCTD1	potassium channel tetramerisation domain containing 1	-1.472	-1.707
204420_at	FOSL1	FOS-like antigen 1	-1.458	-1.281
218468_s_at	GREM1	gremlin 1	-1.456	-2.151
220011_at	C1orf135	chromosome 1 open reading frame 135	-1.449	-1.424
235457_at	MAML2	mastermind-like 2 (Drosophila)	-1.447	-1.434
235521_at	HOXA3	homeobox A3	-1.447	-4.17
235683_at	SESN3	sestrin 3	-1.446	-4.476
215076_s_at	COL3A1	collagen, type III, alpha 1	-1.444	-1.696
238621_at	FMN1	--	-1.44	-1.298
209238_at	STX3	syntaxin 3	-1.415	-1.488
226086_at	SYT13	synaptotagmin XIII	-1.41	-4.268
214586_at	GPR37	G protein-coupled receptor 37 (endothelin receptor type B-like)	-1.409	-1.316
218815_s_at	TMEM51	transmembrane protein 51	-1.391	-1.394
227174_at	WDR72	WD repeat domain 72	-1.383	-4.14
225293_at	COL27A1	collagen, type XXVII, alpha 1	-1.372	-2.103
225520_at	MTHFD1L	methylenetetrahydrofolate dehydrogenase (NADP+ dependent) 1-like	-1.36	-1.703
228992_at	MED28	mediator complex subunit 28	-1.358	-1.446
227828_s_at	FAM176A	family with sequence similarity 176, member A	-1.353	-1.319
213373_s_at	CASP8	caspase 8, apoptosis-related cysteine peptidase	-1.307	-1.448
227812_at	TNFRSF19	tumor necrosis factor receptor superfamily, member 19	-5.797	2.96
214761_at	ZNF423	zinc finger protein 423	-5.572	1.769
205014_at	FGFBP1	fibroblast growth factor binding protein 1	-5.057	1.281
205623_at	ALDH3A1	aldehyde dehydrogenase 3 family, member A1	-3.663	2.925
203423_at	RBP1	retinol binding protein 1, cellular	-3.317	1.464
212143_s_at	IGFBP3	insulin-like growth factor binding protein 3	-3.208	1.889
217997_at	PHLDA1	pleckstrin homology-like domain, family A, member 1	-3.184	2.678
212977_at	CXCR7	chemokine (C-X-C motif) receptor 7	-2.921	1.292
223895_s_at	EPN3	epsin 3	-2.908	1.282
201645_at	TNC	tenascin C	-2.883	1.612
222891_s_at	BCL11A	B-cell CLL/lymphoma 11A (zinc finger protein)	-2.776	2.079
219619_at	DIRAS2	DIRAS family, GTP-binding RAS-like 2	-2.662	2.859
205381_at	LRRC17	leucine rich repeat containing 17	-2.61	1.419
201416_at	SOX4	SRY (sex determining region Y)-box 4	-2.592	1.632
200923_at	LGALS3BP	lectin, galactoside-binding, soluble, 3 binding protein	-2.451	1.862
823_at	CX3CL1	chemokine (C-X3-C motif) ligand 1	-2.305	1.725
213358_at	KIAA0802	KIAA0802	-2.254	1.567
201340_s_at	ENC1	ectodermal-neural cortex 1 (with BTB-like domain)	-2.228	1.679
224480_s_at	AGPAT9	1-acylglycerol-3-phosphate O-acyltransferase 9	-2.153	1.923
204439_at	IFI44L	interferon-induced protein 44-like	-2.135	1.28
201939_at	PLK2	polo-like kinase 2	-2.118	2.443
35666_at	SEMA3F	sema domain, immunoglobulin domain (Ig), short basic domain, secreted, (semaphorin) 3F	-2.066	1.259
204712_at	WIF1	WNT inhibitory factor 1	-2.051	3.976
204686_at	IRS1	insulin receptor substrate 1	-2.019	1.259
232914_s_at	SYTL2	synaptotagmin-like 2	-1.995	1.258
232118_at	CRLS1	cardiolipin synthase 1	-1.988	1.554
228377_at	KLHL14	kelch-like 14 (Drosophila)	-1.955	1.274
213169_at	SEMA5A	sema domain, 5A	-1.932	1.318
215717_s_at	FBN2	fibrillin 2	-1.924	3.078
1566901_at	TGIF1	TGFB-induced factor homeobox 1	-1.901	1.474
207540_s_at	SYK	spleen tyrosine kinase	-1.881	1.987
202149_at	NEDD9	neural precursor cell expressed, developmentally down-regulated 9	-1.879	1.407
206189_at	UNC5C	unc-5 homolog C (C. elegans)	-1.878	1.263
225664_at	COL12A1	collagen, type XII, alpha 1	-1.872	1.503
204529_s_at	TOX	thymocyte selection-associated high mobility group box	-1.862	3.227
204820_s_at	BTN3A3	butyrophilin, subfamily 3, member A3	-1.861	1.282
221558_s_at	LEF1	lymphoid enhancer-binding factor 1	-1.851	2.338
204724_s_at	COL9A3	--	-1.832	1.389
228104_at	PLXNA4	plexin A4	-1.814	1.985
235343_at	VASH2	vasohibin 2	-1.769	3.079
1563512_at	NOS1AP	nitric oxide synthase 1 (neuronal) adaptor protein	-1.755	1.259
229221_at	CD44	CD44 molecule (Indian blood group)	-1.747	1.672
33323_r_at	SFN	stratifin	-1.744	2.452
228776_at	GJC1	gap junction protein, gamma 1, 45kDa	-1.742	1.29
213716_s_at	SECTM1	secreted and transmembrane 1	-1.73	1.573
206377_at	FOXF2	forkhead box F2	-1.726	3.064
229275_at	IGFN1	immunoglobulin-like and fibronectin type III domain containing 1	-1.72	1.529
225167_at	FRMD4A	FERM domain containing 4A	-1.709	1.419
229638_at	IRX3	iroquois homeobox 3	-1.703	2.137
209487_at	RBPMS	--	-1.689	1.289
226279_at	PRSS23	protease, serine, 23	-1.682	2.274
214321_at	NOV	nephroblastoma overexpressed gene	-1.674	1.871
204151_x_at	AKR1C1/AKR1C2	aldo-keto reductase family 1, member C2	-1.652	1.317
1554469_at	ZBTB44	zinc finger and BTB domain containing 44	-1.652	1.282
215692_s_at	MPPED2	metallophosphoesterase domain containing 2	-1.648	2.307
203153_at	IFIT1	interferon-induced protein with tetratricopeptide repeats 1	-1.646	1.379
209699_x_at	AKR1C2	--	-1.644	1.302
229700_at	LOC148203	zinc finger protein 738	-1.642	2.304
217853_at	TNS3	tensin 3	-1.642	1.443
202267_at	LAMC2	laminin, gamma 2	-1.633	1.348
223821_s_at	SUSD4	sushi domain containing 4	-1.615	1.296
225973_at	TAP2	transporter 2, ATP-binding cassette, sub-family B (MDR/TAP)	-1.614	1.27
208928_at	POR	P450 (cytochrome) oxidoreductase	-1.606	1.492
225968_at	PRICKLE2	prickle homolog 2 (Drosophila)	-1.604	1.286
227875_at	KLHL13	kelch-like 13 (Drosophila)	-1.601	1.597
210220_at	FZD2	frizzled homolog 2 (Drosophila)	-1.598	1.273
232762_at	KIAA1217	KIAA1217	-1.589	1.374
227997_at	IL17RD	interleukin 17 receptor D	-1.582	2.894
232168_x_at	MACF1	--	-1.543	1.484
206307_s_at	FOXD1	forkhead box D1	-1.536	1.251
226360_at	ZNRF3	zinc and ring finger 3	-1.535	2.178
242260_at	MATR3	matrin 3	-1.533	2.264
227443_at	C9orf150	chromosome 9 open reading frame 150	-1.53	1.344
202949_s_at	FHL2	four and a half LIM domains 2	-1.522	1.339
232921_at	KIAA1549	KIAA1549	-1.516	1.488
212503_s_at	DIP2C	DIP2 disco-interacting protein 2 homolog C (Drosophila)	-1.511	1.261
216202_s_at	SPTLC2	serine palmitoyltransferase, long chain base subunit 2	-1.477	1.252
204288_s_at	SORBS2	--	-1.474	1.796
219427_at	FAT4	FAT tumor suppressor homolog 4 (Drosophila)	-1.468	1.499
231848_x_at	ZNF207	zinc finger protein 207	-1.463	1.492
206828_at	TXK	TXK tyrosine kinase	-1.462	1.88
220732_at	PREX2	phosphatidylinositol-3,4,5-trisphosphate-dependent Rac exchange factor 2	-1.46	3.685
1558306_at	THADA	thyroid adenoma associated	-1.46	1.952
218611_at	IER5	immediate early response 5	-1.456	1.779
225959_s_at	ZNRF1	zinc and ring finger 1	-1.451	1.363
225301_s_at	MYO5B	myosin VB	-1.439	1.372
202054_s_at	ALDH3A2	aldehyde dehydrogenase 3 family, member A2	-1.417	2.44
209153_s_at	TCF3	transcription factor 3 (E2A immunoglobulin enhancer binding factors E12/E47)	-1.392	1.462
211580_s_at	PIK3R3	phosphoinositide-3-kinase, regulatory subunit 3 (gamma)	-1.389	1.418
223642_at	ZIC2	Zic family member 2 (odd-paired homolog, Drosophila)	-1.387	3.866
203860_at	PCCA	propionyl CoA carboxylase, alpha polypeptide	-1.387	1.827
209897_s_at	SLIT2	slit homolog 2 (Drosophila)	-1.376	1.395
211576_s_at	SLC19A1	solute carrier family 19 (folate transporter), member 1	-1.375	1.25
201563_at	SORD	sorbitol dehydrogenase	-1.364	3.813
230369_at	GPR161	G protein-coupled receptor 161	-1.347	1.576
222258_s_at	SH3BP4	SH3-domain binding protein 4	-1.34	1.433
205743_at	STAC	SH3 and cysteine rich domain	-1.338	1.284
224428_s_at	CDCA7	--	-1.336	2.198
219014_at	PLAC8	placenta-specific 8	-1.334	1.568
219352_at	HERC6	hect domain and RLD 6	-1.327	1.414
202384_s_at	TCOF1	Treacher Collins-Franceschetti syndrome 1	-1.325	1.342
212533_at	WEE1	WEE1 homolog (S. pombe)	-1.316	1.255
212407_at	METTL13	methyltransferase like 13	-1.309	1.349
227259_at	CD47	CD47 molecule	1.273	-3.101
227021_at	KDM1B	lysine (K)-specific demethylase 1B	1.309	-2.11
212221_x_at	IDS	iduronate 2-sulfatase	1.314	-1.26
217904_s_at	BACE1	beta-site APP-cleaving enzyme 1	1.32	-1.335
222763_s_at	WDR33	WD repeat domain 33	1.328	-1.385
221245_s_at	FZD5	frizzled homolog 5 (Drosophila)	1.332	-2.255
219410_at	TMEM45A	transmembrane protein 45A	1.338	-2.213
207431_s_at	DEGS1	degenerative spermatocyte homolog 1, lipid desaturase (Drosophila)	1.34	-1.283
219654_at	PTPLA	protein tyrosine phosphatase-like (proline instead of catalytic arginine), member A	1.34	-3.225
227135_at	NAAA	N-acylethanolamine acid amidase	1.349	-1.258
203821_at	HBEGF	heparin-binding EGF-like growth factor	1.349	-1.383
228555_at	CAMK2D	calcium/calmodulin-dependent protein kinase II delta	1.349	-1.781
213407_at	PHLPP2	PH domain and leucine rich repeat protein phosphatase 2	1.354	-1.305
212110_at	SLC39A14	solute carrier family 39 (zinc transporter), member 14	1.355	-1.471
207332_s_at	TFRC	transferrin receptor (p90, CD71)	1.356	-1.539
202234_s_at	SLC16A1	solute carrier family 16, member 1 (monocarboxylic acid transporter 1)	1.359	-1.91
200931_s_at	VCL	vinculin	1.36	-1.405
213798_s_at	CAP1	CAP, adenylate cyclase-associated protein 1 (yeast)	1.362	-1.266
204085_s_at	CLN5	ceroid-lipofuscinosis, neuronal 5	1.362	-1.449
203855_at	WDR47	WD repeat domain 47	1.365	-1.558
226726_at	MBOAT2	membrane bound O-acyltransferase domain containing 2	1.368	-1.35
208876_s_at	PAK2	p21 protein (Cdc42/Rac)-activated kinase 2	1.37	-1.9
201828_x_at	FAM127A	family with sequence similarity 127, member A	1.372	-1.498
202064_s_at	SEL1L	sel-1 suppressor of lin-12-like (C. elegans)	1.373	-1.518
205219_s_at	GALK2	galactokinase 2	1.375	-1.328
222455_s_at	PARVA	parvin, alpha	1.384	-1.564
204899_s_at	SAP30	Sin3A-associated protein, 30kDa	1.389	-1.361
231990_at	USP15	ubiquitin specific peptidase 15	1.39	-1.286
219564_at	KCNJ16	potassium inwardly-rectifying channel, subfamily J, member 16	1.397	-1.444
202134_s_at	WWTR1	WW domain containing transcription regulator 1	1.399	-1.379
228635_at	PCDH10	protocadherin 10	1.408	-1.418
203691_at	PI3	--	1.415	-2.778
231137_at	IDH3A	isocitrate dehydrogenase 3 (NAD+) alpha	1.427	-1.359
226907_at	PPP1R14C	protein phosphatase 1, regulatory (inhibitor) subunit 14C	1.433	-1.954
224036_s_at	LMBR1	limb region 1 homolog (mouse)	1.439	-1.928
242984_at	MKLN1	muskelin 1, intracellular mediator containing kelch motifs	1.44	-1.257
209189_at	FOS	FBJ murine osteosarcoma viral oncogene homolog	1.441	-1.704
208814_at	HSPA4	heat shock 70kDa protein 4	1.444	-1.644
209668_x_at	CES2	carboxylesterase 2	1.445	-1.255
210317_s_at	YWHAE	tyrosine 3-monooxygenase/tryptophan 5-monooxygenase activation protein, epsilon polypeptide	1.448	-1.386
226752_at	FAM174A	family with sequence similarity 174, member A	1.45	-1.388
202890_at	MAP7	microtubule-associated protein 7	1.451	-1.472
238750_at	CCL28	chemokine (C-C motif) ligand 28	1.47	-1.396
219073_s_at	OSBPL10	oxysterol binding protein-like 10	1.474	-1.556
213361_at	TDRD7	tudor domain containing 7	1.478	-1.314
225999_at	RIMKLB	ribosomal modification protein rimK-like family member B	1.479	-1.357
223078_s_at	TMOD3	tropomodulin 3 (ubiquitous)	1.493	-1.418
212647_at	RRAS	related RAS viral (r-ras) oncogene homolog	1.502	-1.87
209373_at	MALL	mal, T-cell differentiation protein-like	1.503	-2.615
227256_at	USP31	ubiquitin specific peptidase 31	1.504	-1.304
220646_s_at	KLRF1	killer cell lectin-like receptor subfamily F, member 1	1.51	-1.73
224919_at	MRPS6	mitochondrial ribosomal protein S6	1.516	-1.527
1554242_a_at	COCH	coagulation factor C homolog, cochlin (Limulus polyphemus)	1.523	-1.549
215813_s_at	PTGS1	prostaglandin-endoperoxide synthase 1 (prostaglandin G/H synthase and cyclooxygenase)	1.53	-8.249
202442_at	AP3S1	adaptor-related protein complex 3, sigma 1 subunit	1.539	-1.371
242271_at	SLC26A9	solute carrier family 26, member 9	1.54	-1.655
225186_at	RAPH1	Ras association (RalGDS/AF-6) and pleckstrin homology domains 1	1.54	-2.415
213413_at	STON1	stonin 1	1.547	-1.386
244056_at	SFTA2	surfactant associated 2	1.55	-4.781
226275_at	MXD1	MAX dimerization protein 1	1.551	-1.804
212508_at	MOAP1	modulator of apoptosis 1	1.554	-1.365
226814_at	ADAMTS9	ADAM metallopeptidase with thrombospondin type 1 motif, 9	1.554	-2.563
210654_at	TNFRSF10D	tumor necrosis factor receptor superfamily, member 10d, decoy with truncated death domain	1.557	-2.134
217848_s_at	PPA1	pyrophosphatase (inorganic) 1	1.561	-1.669
209803_s_at	PHLDA2	pleckstrin homology-like domain, family A, member 2	1.57	-1.497
200935_at	CALR	calreticulin	1.571	-1.267
228783_at	BVES	blood vessel epicardial substance	1.579	-1.429
212586_at	CAST	calpastatin	1.579	-1.439
203592_s_at	FSTL3	follistatin-like 3 (secreted glycoprotein)	1.589	-1.301
216044_x_at	FAM69A	family with sequence similarity 69, member A	1.602	-1.457
211602_s_at	TRPC1	transient receptor potential cation channel, subfamily C, member 1	1.607	-2.098
209267_s_at	SLC39A8	solute carrier family 39 (zinc transporter), member 8	1.635	-11.341
211596_s_at	LRIG1	leucine-rich repeats and immunoglobulin-like domains 1	1.645	-1.635
210942_s_at	ST3GAL6	ST3 beta-galactoside alpha-2,3-sialyltransferase 6	1.645	-1.903
1552610_a_at	JAK1	Janus kinase 1	1.665	-1.323
230150_at	BCAP29	B-cell receptor-associated protein 29	1.669	-1.292
227126_at	PTPRG	protein tyrosine phosphatase, receptor type, G	1.67	-2.155
204803_s_at	RRAD	Ras-related associated with diabetes	1.672	-1.783
209575_at	IL10RB	interleukin 10 receptor, beta	1.682	-1.296
202609_at	EPS8	epidermal growth factor receptor pathway substrate 8	1.69	-1.403
204526_s_at	TBC1D8	TBC1 domain family, member 8 (with GRAM domain)	1.7	-1.551
203881_s_at	DMD	--	1.717	-1.302
223274_at	TCF19	transcription factor 19	1.728	-1.365
202283_at	SERPINF1	serpin peptidase inhibitor, clade F (alpha-2 antiplasmin, pigment epithelium derived factor), member 1	1.738	-1.522
224911_s_at	DCBLD2	discoidin, CUB and LCCL domain containing 2	1.739	-1.618
212274_at	LPIN1	lipin 1	1.742	-1.379
210829_s_at	SSBP2	single-stranded DNA binding protein 2	1.76	-1.387
1555266_a_at	ASXL2	additional sex combs like 2 (Drosophila)	1.763	-1.513
207173_x_at	CDH11	cadherin 11, type 2, OB-cadherin (osteoblast)	1.778	-1.574
205896_at	SLC22A4	solute carrier family 22 (organic cation/ergothioneine transporter), member 4	1.778	-2.388
201559_s_at	CLIC4	chloride intracellular channel 4	1.787	-2.957
226911_at	EGFLAM	EGF-like, fibronectin type III and laminin G domains	1.789	-1.39
216836_s_at	ERBB2	v-erb-b2 erythroblastic leukemia viral oncogene homolog 2, neuro/glioblastoma derived oncogene homolog (avian)	1.793	-1.274
225010_at	CCDC6	coiled-coil domain containing 6	1.797	-3.828
207264_at	KDELR3	KDEL (Lys-Asp-Glu-Leu) endoplasmic reticulum protein retention receptor 3	1.801	-2.169
210148_at	HIPK3	homeodomain interacting protein kinase 3	1.804	-2.734
1558365_at	PGK1	phosphoglycerate kinase 1	1.805	-1.804
209105_at	NCOA1	nuclear receptor coactivator 1	1.823	-1.334
202812_at	GAA	glucosidase, alpha; acid	1.83	-1.32
202620_s_at	PLOD2	procollagen-lysine, 2-oxoglutarate 5-dioxygenase 2	1.835	-1.273
203810_at	DNAJB4	DnaJ (Hsp40) homolog, subfamily B, member 4	1.846	-1.255
221238_at	HMGN5	high-mobility group nucleosome binding domain 5	1.871	-1.452
203434_s_at	MME	membrane metallo-endopeptidase	1.875	-2.256
207717_s_at	PKP2	plakophilin 2	1.899	-1.647
205579_at	HRH1	histamine receptor H1	1.9	-2.244
201850_at	CAPG	capping protein (actin filament), gelsolin-like	1.924	-1.323
208622_s_at	EZR	ezrin	1.934	-1.508
1555326_a_at	ADAM9	ADAM metallopeptidase domain 9	1.936	-1.655
221004_s_at	ITM2C	integral membrane protein 2C	1.942	-2.221
221566_s_at	NOL3	nucleolar protein 3 (apoptosis repressor with CARD domain)	1.974	-1.259
226436_at	RASSF4	Ras association (RalGDS/AF-6) domain family member 4	1.975	-1.699
1555830_s_at	ESYT2	extended synaptotagmin-like protein 2	2.005	-2.253
226939_at	CPEB2	cytoplasmic polyadenylation element binding protein 2	2.014	-1.436
208779_x_at	DDR1	discoidin domain receptor tyrosine kinase 1	2.017	-1.304
223216_x_at	ZNF395	zinc finger protein 395	2.046	-1.252
207178_s_at	FRK	fyn-related kinase	2.049	-2.914
215294_s_at	SMARCA1	SWI/SNF related, matrix associated, actin dependent regulator of chromatin, subfamily a, member 1	2.057	-1.482
241703_at	RUNDC3B	RUN domain containing 3B	2.071	-1.525
226576_at	ARHGAP26	Rho GTPase activating protein 26	2.086	-2.056
206517_at	CDH16	cadherin 16, KSP-cadherin	2.094	-2.763
1554557_at	ATP11B	ATPase, class VI, type 11B	2.103	-1.77
202887_s_at	DDIT4	DNA-damage-inducible transcript 4	2.111	-1.353
215236_s_at	PICALM	phosphatidylinositol binding clathrin assembly protein	2.112	-1.432
217887_s_at	EPS15	epidermal growth factor receptor pathway substrate 15	2.134	-1.279
225575_at	LIFR	leukemia inhibitory factor receptor alpha	2.139	-1.425
227404_s_at	EGR1	early growth response 1	2.142	-1.763
210740_s_at	ITPK1	inositol 1,3,4-triphosphate 5/6 kinase	2.143	-1.496
209184_s_at	IRS2	insulin receptor substrate 2	2.144	-2.391
242722_at	LMO7	LIM domain 7	2.164	-1.273
229168_at	COL23A1	collagen, type XXIII, alpha 1	2.176	-2.008
214053_at	ERBB4	v-erb-a erythroblastic leukemia viral oncogene homolog 4 (avian)	2.186	-1.645
225626_at	PAG1	phosphoprotein associated with glycosphingolipid microdomains 1	2.193	-1.424
201110_s_at	THBS1	thrombospondin 1	2.195	-1.352
201617_x_at	CALD1	--	2.199	-1.357
207543_s_at	P4HA1	prolyl 4-hydroxylase, alpha polypeptide I	2.235	-1.479
219630_at	PDZK1IP1	PDZK1 interacting protein 1	2.236	-2.879
201041_s_at	DUSP1	dual specificity phosphatase 1	2.243	-1.268
229603_at	BBS12	Bardet-Biedl syndrome 12	2.265	-1.398
202861_at	PER1	period homolog 1 (Drosophila)	2.283	-1.632
202765_s_at	FBN1	fibrillin 1	2.305	-1.792
211665_s_at	SOS2	son of sevenless homolog 2 (Drosophila)	2.344	-1.404
213012_at	NEDD4	neural precursor cell expressed, developmentally down-regulated 4	2.344	-1.799
210286_s_at	SLC4A7	solute carrier family 4, sodium bicarbonate cotransporter, member 7	2.362	-2.198
226039_at	MGAT4A	mannosyl (alpha-1,3-)-glycoprotein beta-1,4-N-acetylglucosaminyltransferase, isozyme A	2.402	-2.027
213436_at	CNR1	cannabinoid receptor 1 (brain)	2.42	-2.746
211986_at	AHNAK	AHNAK nucleoprotein	2.431	-1.314
226452_at	PDK1	pyruvate dehydrogenase kinase, isozyme 1	2.433	-1.675
206884_s_at	SCEL	sciellin	2.547	-3.035
224606_at	KLF6	Kruppel-like factor 6	2.574	-1.456
226982_at	ELL2	elongation factor, RNA polymerase II, 2	2.578	-1.79
1553678_a_at	ITGB1	integrin, beta 1 (fibronectin receptor, beta polypeptide, antigen CD29 includes MDF2, MSK12)	2.608	-1.471
244780_at	SGPP2	sphingosine-1-phosphate phosphatase 2	2.614	-2.201
203607_at	INPP5F	inositol polyphosphate-5-phosphatase F	2.623	-1.35
203453_at	SCNN1A	sodium channel, nonvoltage-gated 1 alpha	2.728	-1.305
221478_at	BNIP3L	BCL2/adenovirus E1B 19kDa interacting protein 3-like	2.836	-1.28
205776_at	FMO5	flavin containing monooxygenase 5	3.003	-2.026
202733_at	P4HA2	prolyl 4-hydroxylase, alpha polypeptide II	3.037	-1.302
207761_s_at	METTL7A	methyltransferase like 7A	3.224	-1.54
201531_at	ZFP36	zinc finger protein 36, C3H type, homolog (mouse)	3.305	-1.562
203713_s_at	LLGL2	lethal giant larvae homolog 2 (Drosophila)	3.357	-1.269
213167_s_at	SLC5A3	solute carrier family 5 (sodium/myo-inositol cotransporter), member 3	3.649	-1.871
236420_s_at	ANO4	anoctamin 4	3.718	-1.379
202644_s_at	TNFAIP3	tumor necrosis factor, alpha-induced protein 3	3.805	-1.531
224209_s_at	GDA	guanine deaminase	3.908	-1.669
215446_s_at	LOX	lysyl oxidase	4.101	-1.353
222802_at	EDN1	endothelin 1	4.105	-1.584
201502_s_at	NFKBIA	nuclear factor of kappa light polypeptide gene enhancer in B-cells inhibitor, alpha	4.582	-1.368
228754_at	SLC6A6	solute carrier family 6 (neurotransmitter transporter, taurine), member 6	4.83	-1.748
220643_s_at	FAIM	Fas apoptotic inhibitory molecule	4.895	-1.304
225165_at	PPP1R1B	protein phosphatase 1, regulatory (inhibitor) subunit 1B	5.345	-1.919
208763_s_at	TSC22D3	--	5.854	-1.604
204254_s_at	VDR	vitamin D (1,25- dihydroxyvitamin D3) receptor	9.73	-1.418
222940_at	SULT1E1	sulfotransferase family 1E, estrogen-preferring, member 1	11.33	-1.736
204363_at	F3	coagulation factor III (thromboplastin, tissue factor)	11.404	-4.472
210538_s_at	BIRC3	baculoviral IAP repeat containing 3	11.873	-3.136
222073_at	COL4A3	collagen, type IV, alpha 3 (Goodpasture antigen)	18.068	-3.665
204560_at	FKBP5	FK506 binding protein 5	22.547	-1.645
210223_s_at	MR1	major histocompatibility complex, class I-related	1.277	1.828
205756_s_at	F8	coagulation factor VIII, procoagulant component	1.28	1.438
202825_at	SLC25A4	solute carrier family 25 (mitochondrial carrier; adenine nucleotide translocator), member 4	1.281	1.491
202990_at	PYGL	phosphorylase, glycogen, liver	1.301	1.523
228306_at	CNIH4	cornichon homolog 4 (Drosophila)	1.314	1.41
225729_at	C6orf89	chromosome 6 open reading frame 89	1.314	1.328
44783_s_at	HEY1	hairy/enhancer-of-split related with YRPW motif 1	1.32	3.002
214719_at	SLC46A3	solute carrier family 46, member 3	1.328	1.579
205373_at	CTNNA2	catenin (cadherin-associated protein), alpha 2	1.334	2.005
212880_at	WDR7	WD repeat domain 7	1.34	1.28
231927_at	ATF6	activating transcription factor 6	1.347	1.752
209355_s_at	PPAP2B	phosphatidic acid phosphatase type 2B	1.349	1.781
216541_x_at	IGHM	immunoglobulin heavy constant mu	1.355	2.638
220014_at	PRR16	proline rich 16	1.36	3.119
221903_s_at	CYLD	cylindromatosis (turban tumor syndrome)	1.369	1.492
228461_at	SH3RF3	SH3 domain containing ring finger 3	1.39	1.427
204061_at	PRKX	protein kinase, X-linked	1.399	1.558
209276_s_at	GLRX	glutaredoxin (thioltransferase)	1.407	1.945
204745_x_at	MT1G	metallothionein 1G	1.409	1.936
212412_at	PDLIM5	PDZ and LIM domain 5	1.416	1.617
201841_s_at	HSPB1	heat shock 27kDa protein 1	1.419	1.861
209101_at	CTGF	connective tissue growth factor	1.427	1.507
201522_x_at	SNRPN	small nuclear ribonucleoprotein polypeptide N	1.43	2.192
205885_s_at	ITGA4	integrin, alpha 4 (antigen CD49D, alpha 4 subunit of VLA-4 receptor)	1.43	1.441
203914_x_at	HPGD	hydroxyprostaglandin dehydrogenase 15-(NAD)	1.442	4.011
208228_s_at	FGFR2	fibroblast growth factor receptor 2	1.446	2.043
226478_at	TM7SF3	transmembrane 7 superfamily member 3	1.457	1.477
226609_at	DCBLD1	discoidin, CUB and LCCL domain containing 1	1.462	1.46
205979_at	SCGB2A1	secretoglobin, family 2A, member 1	1.463	1.729
200760_s_at	ARL6IP5	ADP-ribosylation-like factor 6 interacting protein 5	1.466	1.332
210222_s_at	RTN1	reticulon 1	1.467	3.405
203126_at	IMPA2	inositol(myo)-1(or 4)-monophosphatase 2	1.468	1.938
207847_s_at	MUC1	mucin 1, cell surface associated	1.478	1.27
214270_s_at	MAPRE3	microtubule-associated protein, RP/EB family, member 3	1.484	1.361
205161_s_at	PEX11A	peroxisomal biogenesis factor 11 alpha	1.485	1.271
210732_s_at	LGALS8	lectin, galactoside-binding, soluble, 8	1.487	1.569
1554049_s_at	DCAF8	DDB1 and CUL4 associated factor 8	1.493	1.413
209794_at	SRGAP3	SLIT-ROBO Rho GTPase activating protein 3	1.507	1.447
205348_s_at	DYNC1I1	dynein, cytoplasmic 1, intermediate chain 1	1.514	1.346
201141_at	GPNMB	glycoprotein (transmembrane) nmb	1.516	1.433
204476_s_at	PC	pyruvate carboxylase	1.522	1.275
236884_at	RIMKLA	ribosomal modification protein rimK-like family member A	1.524	1.282
1554789_a_at	PDE8B	phosphodiesterase 8B	1.536	2.499
212859_x_at	MT1E	metallothionein 1F	1.536	1.479
209049_s_at	ZMYND8	zinc finger, MYND-type containing 8	1.544	1.336
203069_at	SV2A	synaptic vesicle glycoprotein 2A	1.547	2.105
225266_at	ZNF652	zinc finger protein 652	1.548	1.425
210479_s_at	RORA	RAR-related orphan receptor A	1.549	1.427
240310_at	TOR1AIP1	torsin A interacting protein 1	1.552	1.416
206766_at	ITGA10	integrin, alpha 10	1.556	1.339
206461_x_at	MT1H	metallothionein 1H	1.56	1.665
230226_s_at	KDM5A	lysine (K)-specific demethylase 5A	1.565	1.317
227209_at	CNTN1	contactin 1	1.574	1.399
202017_at	EPHX1	epoxide hydrolase 1, microsomal (xenobiotic)	1.578	2.524
217967_s_at	FAM129A	family with sequence similarity 129, member A	1.58	1.442
217856_at	RBM8A	RNA binding motif protein 8A	1.58	1.285
202158_s_at	CELF2	CUGBP, Elav-like family member 2	1.582	2.348
235518_at	SLC8A1	solute carrier family 8 (sodium/calcium exchanger), member 1	1.582	1.425
218618_s_at	FNDC3B	fibronectin type III domain containing 3B	1.582	1.337
219181_at	LIPG	lipase, endothelial	1.588	1.313
224435_at	C10ORF58	chromosome 10 open reading frame 58	1.593	1.552
211467_s_at	NFIB	nuclear factor I/B	1.595	2.575
201482_at	QSOX1	quiescin Q6 sulfhydryl oxidase 1	1.597	1.69
226925_at	ACPL2	acid phosphatase-like 2	1.617	1.696
226602_s_at	BCR	breakpoint cluster region	1.617	1.283
204364_s_at	REEP1	receptor accessory protein 1	1.618	1.921
241989_at	GRK4	G protein-coupled receptor kinase 4	1.631	2.102
204424_s_at	LMO3	LIM domain only 3 (rhombotin-like 2)	1.654	2.174
1558101_at	NFIA	nuclear factor I/A	1.655	1.384
212185_x_at	MT2A	metallothionein 2A	1.671	1.601
220493_at	DMRT1	doublesex and mab-3 related transcription factor 1	1.674	3.476
226281_at	DNER	delta/notch-like EGF repeat containing	1.68	1.493
212446_s_at	LASS6	LAG1 homolog, ceramide synthase 6	1.683	1.456
215111_s_at	TSC22D1	TSC22 domain family, member 1	1.683	1.387
203185_at	RASSF2	Ras association (RalGDS/AF-6) domain family member 2	1.708	1.302
203088_at	FBLN5	fibulin 5	1.714	1.531
201847_at	LIPA	lipase A, lysosomal acid, cholesterol esterase	1.722	2.553
209305_s_at	GADD45B	growth arrest and DNA-damage-inducible, beta	1.725	1.328
205076_s_at	MTMR11	myotubularin related protein 11	1.731	1.288
208683_at	CAPN2	calpain 2, (m/II) large subunit	1.741	1.299
205625_s_at	CALB1	calbindin 1, 28kDa	1.751	2.032
227758_at	RERG	RAS-like, estrogen-regulated, growth inhibitor	1.771	4.23
227347_x_at	HES4	hairy and enhancer of split 4 (Drosophila)	1.794	1.873
237400_at	ATP5S	ATP synthase, H+ transporting, mitochondrial Fo complex, subunit s (factor B)	1.803	1.536
208033_s_at	ZFHX3	zinc finger homeobox 3	1.813	1.426
209822_s_at	VLDLR	very low density lipoprotein receptor	1.819	1.294
214157_at	GNAS	GNAS (guanine nucleotide binding protein, alpha stimulating) complex locus	1.834	2.732
227642_at	TFCP2L1	transcription factor CP2-like 1	1.835	4.54
208581_x_at	MT1X	metallothionein 1X	1.844	2.716
201010_s_at	TXNIP	thioredoxin interacting protein	1.848	1.906
216064_s_at	AGA	aspartylglucosaminidase	1.855	1.675
231166_at	GPR155	G protein-coupled receptor 155	1.93	2.154
209082_s_at	COL18A1	collagen, type XVIII, alpha 1	1.952	1.464
242138_at	DLX1	distal-less homeobox 1	1.96	1.327
223492_s_at	LRRFIP1	--	1.966	1.355
212687_at	LIMS1	--	1.979	1.817
38918_at	SOX13	SRY (sex determining region Y)-box 13	1.979	1.43
212099_at	RHOB	ras homolog gene family, member B	1.993	1.712
204368_at	SLCO2A1	solute carrier organic anion transporter family, member 2A1	2.008	2.144
225177_at	RAB11FIP1	RAB11 family interacting protein 1 (class I)	2.02	1.559
227067_x_at	NOTCH2NL	notch 2 N-terminal like	2.028	1.419
212240_s_at	PIK3R1	phosphoinositide-3-kinase, regulatory subunit 1 (alpha)	2.031	2.427
202898_at	SDC3	syndecan 3	2.034	1.259
229975_at	BMPR1B	bone morphogenetic protein receptor, type IB	2.072	2.356
225016_at	APCDD1	adenomatosis polyposis coli down-regulated 1	2.109	3.638
213006_at	CEBPD	CCAAT/enhancer binding protein (C/EBP), delta	2.116	1.561
202786_at	STK39	serine threonine kinase 39	2.151	1.28
1553672_at	ENAH	--	2.163	1.718
232693_s_at	FBXO16	F-box protein 16	2.186	1.601
211470_s_at	SULT1C2	--	2.198	1.358
203895_at	PLCB4	phospholipase C, beta 4	2.223	1.711
227481_at	CNKSR3	CNKSR family member 3	2.237	1.651
222582_at	PRKAG2	protein kinase, AMP-activated, gamma 2 non-catalytic subunit	2.247	1.285
227948_at	FGD4	FYVE, RhoGEF and PH domain containing 4	2.366	1.323
206385_s_at	ANK3	ankyrin 3, node of Ranvier (ankyrin G)	2.463	1.305
207826_s_at	ID3	inhibitor of DNA binding 3, dominant negative helix-loop-helix protein	2.504	3.124
209098_s_at	JAG1	jagged 1	2.538	1.947
209587_at	PITX1	paired-like homeodomain 1	2.54	1.979
230722_at	BNC2	basonuclin 2	2.546	1.402
206028_s_at	MERTK	c-mer proto-oncogene tyrosine kinase	2.765	1.371
227719_at	SMAD9	SMAD family member 9	2.772	2.535
1555579_s_at	PTPRM	protein tyrosine phosphatase, receptor type, M	2.781	1.479
217202_s_at	GLUL	glutamate-ammonia ligase	2.785	1.846
228401_at	ATAD2	ATPase family, AAA domain containing 2	2.811	1.413
226552_at	IER5L	immediate early response 5-like	2.818	1.703
205862_at	GREB1	growth regulation by estrogen in breast cancer 1	2.947	1.308
211382_s_at	TACC2	transforming, acidic coiled-coil containing protein 2	3.044	1.28
203021_at	SLPI	--	3.053	1.595
221584_s_at	KCNMA1	potassium large conductance calcium-activated channel, subfamily M, alpha member 1	3.083	1.907
202363_at	SPOCK1	sparc/osteonectin, cwcv and kazal-like domains proteoglycan (testican) 1	3.135	2.298
220948_s_at	ATP1A1	ATPase, Na+/K+ transporting, alpha 1 polypeptide	3.205	1.303
206799_at	SCGB1D2	secretoglobin, family 1D, member 2	3.243	1.546
200974_at	ACTA2	actin, alpha 2, smooth muscle, aorta	3.295	1.725
203429_s_at	C1ORF9	chromosome 1 open reading frame 9	3.322	1.448
1556037_s_at	HHIP	hedgehog interacting protein	3.325	1.405
213182_x_at	CDKN1C	cyclin-dependent kinase inhibitor 1C (p57, Kip2)	3.376	3.433
201951_at	ALCAM	activated leukocyte cell adhesion molecule	3.916	1.265
228885_at	MAMDC2	MAM domain containing 2	3.935	1.468
220677_s_at	ADAMTS8	ADAM metallopeptidase with thrombospondin type 1 motif, 8	3.995	4.299
225667_s_at	FAM84A	family with sequence similarity 84, member A	4.071	2.064
219529_at	CLIC3	chloride intracellular channel 3	4.413	2.576
209493_at	PDZD2	PDZ domain containing 2	4.701	3.04
202948_at	IL1R1	interleukin 1 receptor, type I	5.097	1.444
219127_at	PRR15L	proline rich 15-like	5.403	1.429
207996_s_at	C18orf1	chromosome 18 open reading frame 1	5.468	1.313
226269_at	GDAP1	ganglioside-induced differentiation-associated protein 1	5.766	1.536
201830_s_at	NET1	neuroepithelial cell transforming 1	5.775	1.369
211959_at	IGFBP5	insulin-like growth factor binding protein 5	7.352	3.323
213385_at	CHN2	--	10.382	1.741
223168_at	RHOU	ras homolog gene family, member U	11.133	1.716
214595_at	KCNG1	potassium voltage-gated channel, subfamily G, member 1	11.797	1.298
217028_at	CXCR4	chemokine (C-X-C motif) receptor 4	14.041	1.496
208555_x_at	CST2	cystatin SA	34.619	1.399
